# Supplementary material for: Reductive cross-coupling to access C–N bonds from aryl halides and diazoesters under dual nickel/photoredox-catalyzed conditions
Source: Royal Society of Chemistry journal article supplement (doi:10.1039/d1qo00548k), 2021-01-01

**Supporting Information for**

**Reductive Cross-Coupling to Access C-N Bond from Aryl**

**Halides and Diazoesters under Dual Nickel/Photoredox-**

**Catalyzed Conditions**

|                                                          |    |
|----------------------------------------------------------|----|
| 1. General Information .....                             | 1  |
| 2. Light Sources .....                                   | 1  |
| 3. Screening Results.....                                | 2  |
| 4. General Procedures .....                              | 6  |
| 4.1. General procedure for synthesis of hydrazones ..... | 6  |
| 4.2. Preparation of diazoacetates.....                   | 7  |
| 4.3. Procedure for synthesis of compound 4a .....        | 8  |
| 4.4. Procedure for synthesis of compound 4b .....        | 8  |
| 4.5. Procedure for synthesis of compound 4c .....        | 9  |
| 4.6. Procedure for synthesis of compound 4d .....        | 9  |
| 4.7. Comparison reactions.....                           | 10 |
| 4.8. Origin of Z/E-selectivity: time study .....         | 10 |
| 5. Mechanism Studies. ....                               | 11 |
| 6. The Characterization of the New Products .....        | 13 |
| 7. References.....                                       | 23 |
| 8. The Spectra of the New Products.....                  | 25 |

## 1. General Information

All commercially available compounds were used as received.  $^1\text{H}$  and  $^{13}\text{C}$  spectra were recorded on a Bruker Avance 400, 600 spectrometers, and  $\text{CDCl}_3$  was purchased from J&K. Chemical shifts ( $\delta$ ) are given in ppm with the internal standards as TMS (0 ppm for  $^1\text{H}$ ) and  $\text{CDCl}_3$  (77.0 ppm for  $^{13}\text{C}$ ). Flash column chromatography was performed on silica gel 60 (particle size 200-400 mesh ASTM, purchased from Yantai, China) and eluted with petroleum ether/ethyl acetate. Solvents were dried and purified according to the procedure from 'Purification of Laboratory Chemicals book'. Unless otherwise noted, all other reagents and starting materials were purchased from commercial sources and used without further purification.

## 2. Light Sources

Reactions were optimized with 30 W blue LED lamps (450-455 nm) purchased from [www.taobao.com](http://www.taobao.com).

<https://item.taobao.com/item.htm?spm=a1z10.3-c.w4002-15754154531.36.2e3cdeabd55EgT&id=603545564757>

The Schlenk tube was kept 1-2 cm away from the lights, with cooling fan to keep the reaction temperature at 20-30 °C. A fan was placed 6 cm above the LED lamps for cooling and a second fan was placed in front (**Supplementary Figure S1**).

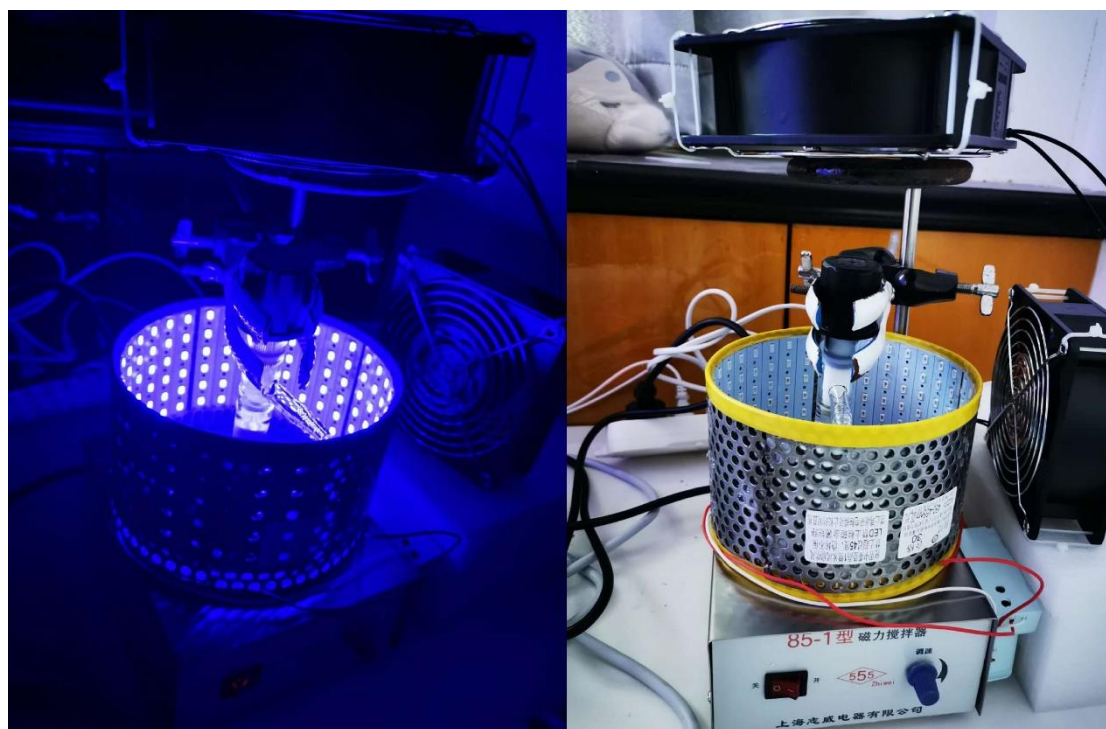

Supplementary Figure S1. Photochemical Setup

### 3. Screening Results

The standard condition was listed below and the screening experiments were tested by changing the relevant parameters based on this procedure:

In the nitrogen filled glovebox, a 25 mL oven-dried Schlenk tube with a magnetic bar were charged with nickel catalyst (10 mol%), ligand (12 mol%), base (2.0 equiv.), reductant (2.0 equiv.) and the photocatalyst (0.001 mmol, 1 mol%). The tube was capped with a septum and took out of the glove box. Under N<sub>2</sub> atmosphere, solvent (2 mL), aryl halide (0.2 mmol) and aryl diazoacetate (0.1 mmol) were added to the reaction vial, then it was immediately set to stir at 800 rpm and irradiated by 30 W blue LEDs for 12 h. The reaction mixture was quenched by saturated NaCl aqueous solution before the internal standard (dodecane) was added to the reaction vial, and extracted with ethyl acetate (2 mL ×2). The crude product was submitted to GC for analysis.

Table S1 screening results on the ligand.

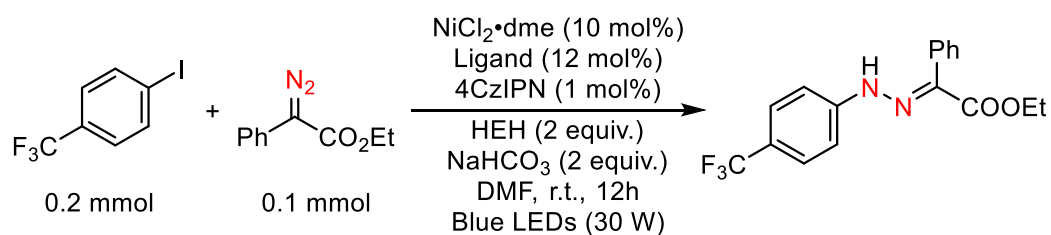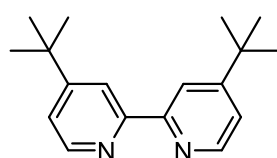

**L1** dtbpy  
23%

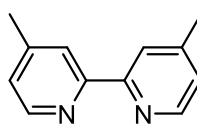

**L2**  
16%

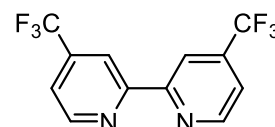

**L3**  
0%

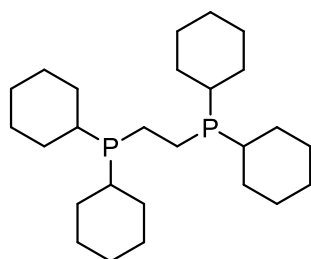

**L4**  
0%

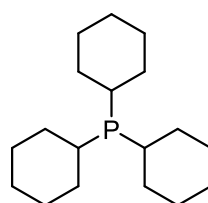

**L5**  
13%

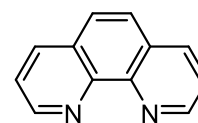

**L6** phen  
14%

Table S2 screening results on the catalyst.

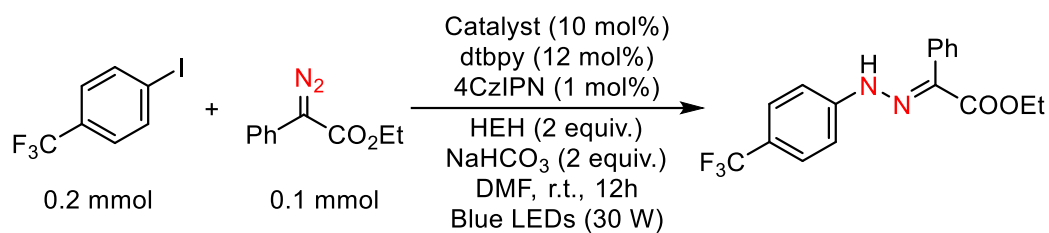

| Entry | Catalyst               | Yield (%) |
|-------|------------------------|-----------|
| 1     | Ni(acac) <sub>2</sub>  | n.d.      |
| 2     | NiI <sub>2</sub>       | n.d.      |
| 3     | NiBr <sub>2</sub> ·dme | 40%       |
| 4     | NiCl <sub>2</sub> ·dme | 23%       |
| 5     | Ni(cod) <sub>2</sub>   | trace     |
| 6     | Ni(OTf) <sub>2</sub>   | n.d.      |

Table S3 screening results on the base.

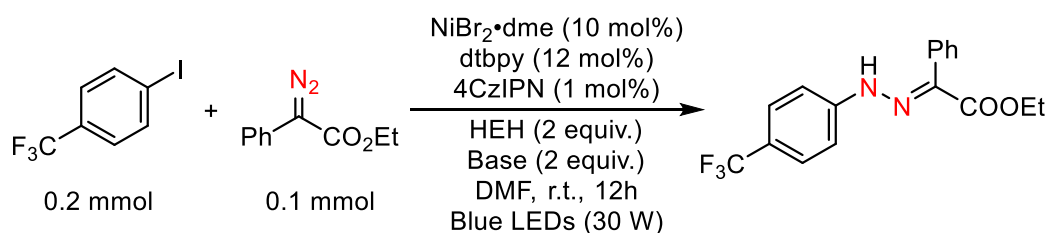

| Entry | Base                            | Yield (%) |
|-------|---------------------------------|-----------|
| 1     | K <sub>2</sub> CO <sub>3</sub>  | 12%       |
| 2     | K <sub>3</sub> PO <sub>4</sub>  | trace     |
| 3     | K <sub>2</sub> HPO <sub>4</sub> | 8%        |
| 4     | Na <sub>2</sub> CO <sub>3</sub> | 20%       |
| 5     | DIPEA                           | trace     |
| 6     | DIPA                            | trace     |
| 7     | TMEDA                           | n.d.      |
| 8     | Et <sub>3</sub> N               | n.d.      |
| 9     | NaHCO <sub>3</sub>              | 40%       |
| 10    | KHCO <sub>3</sub>               | 24%       |
| 11    | Li <sub>2</sub> CO <sub>3</sub> | 10%       |
| 12    | DABCO                           | 24%       |
| 13    | KF                              | trace     |
| 14    | NaOAc                           | trace     |
| 15    | LiOH                            | 12%       |

Table S4 screening results on the solvent.

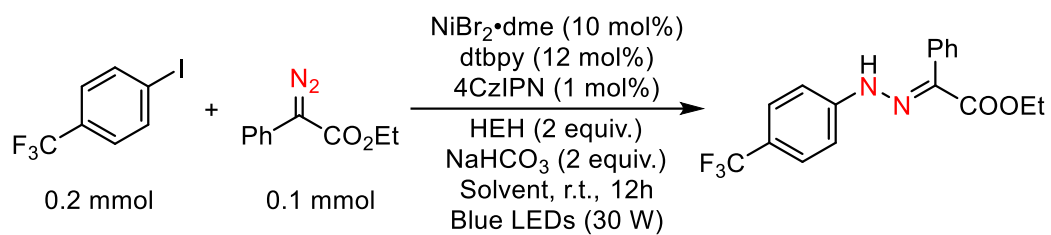

| Entry | Solvent     | Yield (%) |
|-------|-------------|-----------|
| 1     | DMF         | 40%       |
| 2     | DMA         | 66%       |
| 3     | MeCN        | trace     |
| 4     | DMSO        | 10%       |
| 5     | DCE         | trace     |
| 6     | DCM         | trace     |
| 7     | 1,4-dioxane | trace     |
| 8     | THF         | trace     |

Table S5 screening results on the photocatalyst.

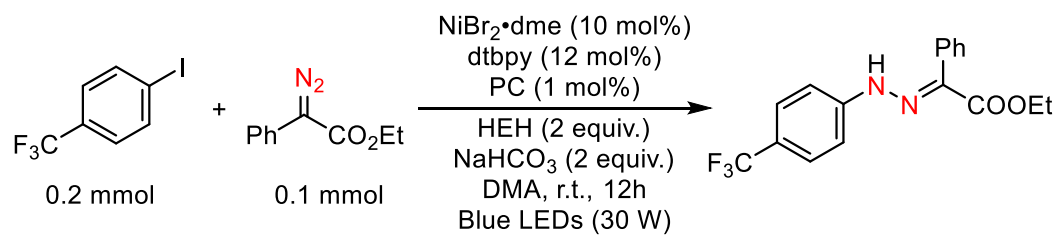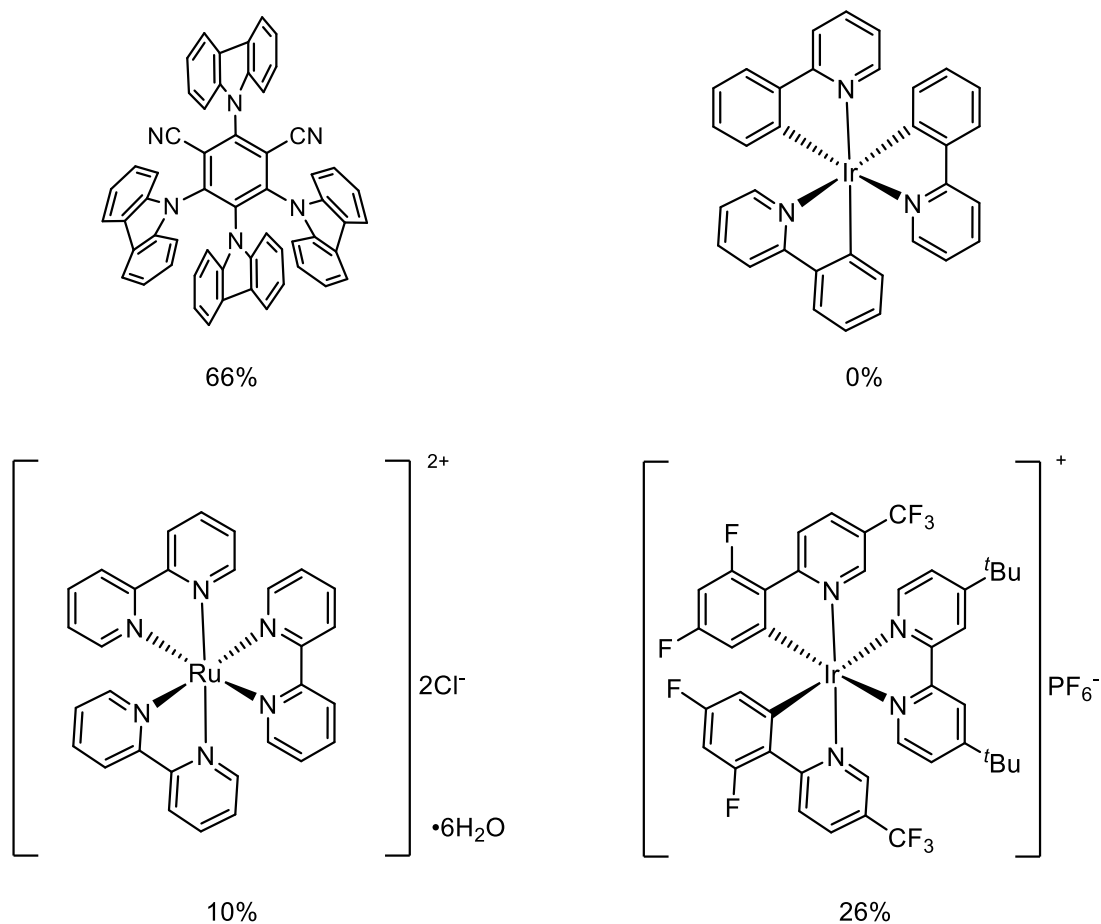

Table S6 screening results on the equivalent of the base.

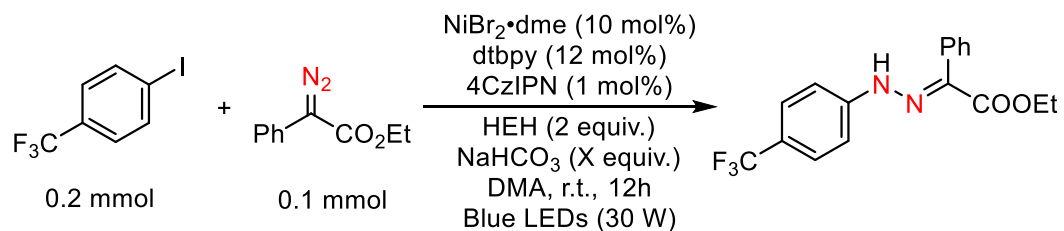

| Entry | X equiv | Yield (%) |
|-------|---------|-----------|
| 1     | 1.0     | 9%        |
| 2     | 2.0     | 66%       |

|   |     |     |
|---|-----|-----|
| 3 | 2.5 | 69% |
| 4 | 3.0 | 65% |
| 5 | 3.5 | 60% |

Table S7 screening results on the ratio of the substrate.

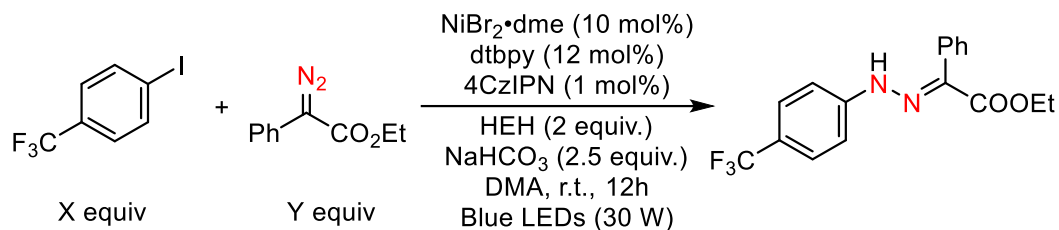

| Entry | X:Y     | Yield(%) |
|-------|---------|----------|
| 1     | 1.0:1.0 | 16%      |
| 2     | 1.5:1.0 | 33%      |
| 3     | 2.0:1.0 | 69%      |
| 4     | 2.5:1.0 | 69%      |
| 5     | 3.0:1.0 | 71%      |
| 6     | 4.0:1.0 | 71%      |
| 7     | 1.0:1.5 | 23%      |
| 8     | 1.0:2.0 | 73%      |
| 9     | 1.0:3.0 | 55%      |

Table S8 control experiments

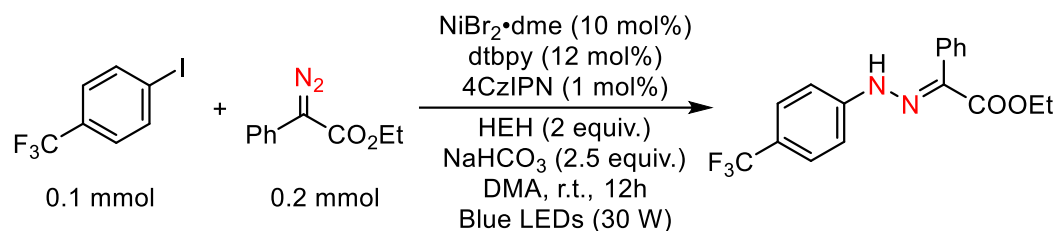

| Entry | Change from standard conditions | Yield (%) |
|-------|---------------------------------|-----------|
| 1     | None                            | 73%       |
| 2     | Without Ni                      | n.d.      |
| 3     | Without Ligand                  | 10%       |
| 4     | Without PC                      | n.d.      |
| 5     | Without NaHCO <sub>3</sub>      | n.d.      |
| 6     | Without HEH                     | n.d.      |

## 4. General Procedures

### 4.1. General procedure for synthesis of hydrazones

In the nitrogen filled glovebox, a 10 mL oven-dried Schlenk tube with a magnetic bar was charged with NiBr<sub>2</sub>·DME (0.02 mmol, 10 mol%), dtbpy (0.024 mmol, 12

mol%), NaHCO<sub>3</sub> (0.5 mmol, 42.0 mg, 2.5 equiv.), HEH (0.4 mmol, 101.2 mg, 2 equiv.) and 4CzIPN (0.002 mmol, 1 mol%). The tube was capped with a septum and took out of the glove box. Under N<sub>2</sub> atmosphere, anhydrous DMA (4 mL), aryl halide (0.2 mmol) and aryl diazoacetate (0.4 mmol, 2 equiv.) were added to the reaction vial, then it was immediately set to stir at 800 rpm and irradiated by 30 W blue LEDs for 12 h. The reaction mixture was quenched by saturated NaCl aqueous solution (2 mL) and the aqueous layer was extracted with ethyl acetate (2 mL × 3). The combined organic layers were dried over MgSO<sub>4</sub>, filtered, and concentrated under vacuo. The residue was purified carefully by column chromatography on silica gel with a gradient eluent of petroleum/ethyl acetate affording the product.

*On 1 mmol scale:* In the nitrogen filled glovebox, a 50 mL oven-dried Schlenk tube with a magnetic bar was charged with NiBr<sub>2</sub>•DME (0.1 mmol, 10 mol%), dtbpy (0.12 mmol, 12 mol%), NaHCO<sub>3</sub> (2.5 mmol, 210.0 mg, 2.5 equiv.), HEH (2 mmol, 506.0 mg, 2 equiv.) and the 4CzIPN (0.01 mmol, 1 mol%). The tube was capped with a septum and took out of the glove box. Under N<sub>2</sub> atmosphere, anhydrous DMA (20 mL), aryl halide (1.0 mmol) and aryl diazoacetate (2.0 mmol, 2 equiv.) were added to the reaction vial, then it was immediately set to stir at 800 rpm and irradiated by 30 W blue LEDs for 30 h. The reaction mixture was quenched by saturated NaCl aqueous solution (10 mL) and the aqueous layer was extracted with ethyl acetate (10 mL × 3). The combined organic layers were dried over MgSO<sub>4</sub>, filtered, and concentrated under vacuo. The residue was purified carefully by column chromatography on silica gel with a gradient eluent of petroleum/ethyl acetate affording the product **3a** (40% isolated yield, 134.8 mg).

#### 4.2. Preparation of diazoacetates<sup>[1]</sup>

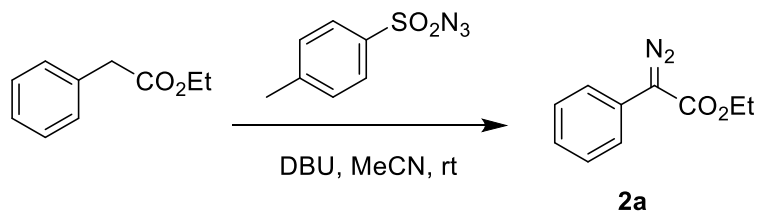

To a solution of ethyl phenylacetate (1.64 g, 10 mmol) and tosyl azide (2.37 g, 12 mmol) in dry CH<sub>3</sub>CN (20 mL) was added 1,8-Diazabicyclo[5.4.0]undec-7-ene (1.79 mL, 13 mmol) dropwise at 0 °C. Then the mixture was stirred overnight at room temperature. The reaction was then quenched with saturated NH<sub>4</sub>Cl aqueous solution, followed by extraction with ethyl acetate (2×20 mL). The combined organic extracts



were dried over anhydrous  $\text{Na}_2\text{SO}_4$ , filtered and concentrated under reduced pressure. The crude product was purified by silica gel column chromatography (petroleum ether:ethyl acetate = 30:1) to give the product **2a** as a yellow oil (1.76 g, 93% yield). The other  $\alpha$ -aryl  $\alpha$ -diazoesters were prepared by the similar procedure.

#### 4.3. Procedure for synthesis of compound **4a**

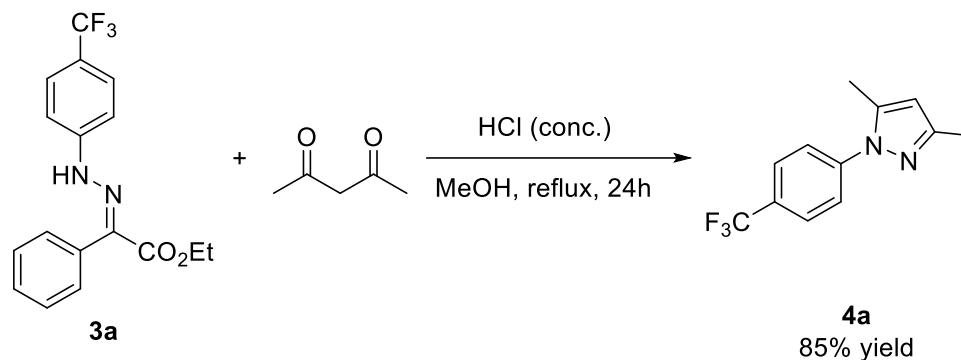

To a 25 mL round bottomed flask equipped with a condenser and a magnetic stirrer was added **3a** (0.1 mmol, 33.6 mg), 2.0 mL methanol (0.10 M), acetylacetone (51  $\mu\text{L}$ , 0.975 g/mL, 0.5 mmol), and 120  $\mu\text{L}$  conc. HCl. The reaction mixture was warmed up to 70  $^\circ\text{C}$ , and stirred for 24 h. After cooling to room temperature, the reaction mixture was quenched with water (10 mL) and extracted with EtOAc (10 mL  $\times$  3). The combined organic layers were dried over anhydrous  $\text{MgSO}_4$ , filtered, and concentrated by rotary evaporation. The residue was purified by column chromatography on silica gel with a gradient eluent of petroleum/ethyl acetate to afford the desired product **4a** (20.3 mg, 85% yield).  $^1\text{H}$  NMR was in agreement with the literature<sup>[2]</sup>.

#### 4.4. Procedure for synthesis of compound **4b**

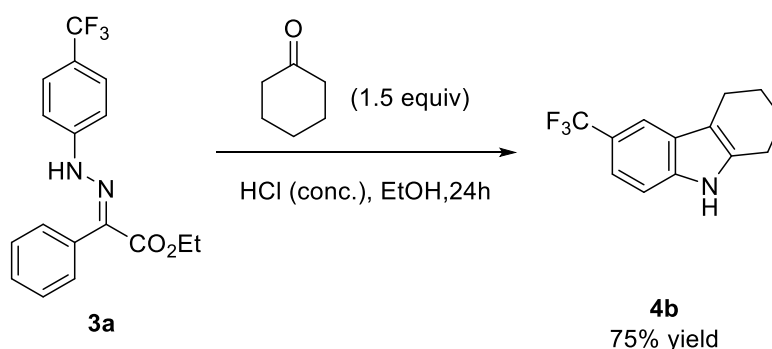

To a 25 mL round bottomed flask equipped with a condenser and a magnetic stirrer was added **3a** (0.1 mmol, 33.6mg), 16  $\mu\text{L}$  (0.947 g/mL, 0.15 mmol) of cyclohexanone, 100  $\mu\text{L}$  of conc. HCl, and 3 mL of anhydrous ethanol. The reaction mixture was warmed up to 85  $^\circ\text{C}$ , and stirred for 24 h until complete conversion (monitored by TLC). After cooling to room temperature, the reaction mixture was quenched with water (10 mL)

and extracted with EtOAc (10 mL × 3). The combined organic layers were dried over anhydrous MgSO<sub>4</sub>, filtered, and concentrated by rotary evaporation. The residue was purified by column chromatography on silica gel with a gradient eluent of petroleum/ethyl acetate to afford the desired product **4b** (18.0 mg, 75% yield). <sup>1</sup>H NMR was in agreement with the literature<sup>[3]</sup>.

#### 4.5. Procedure for synthesis of compound 4c

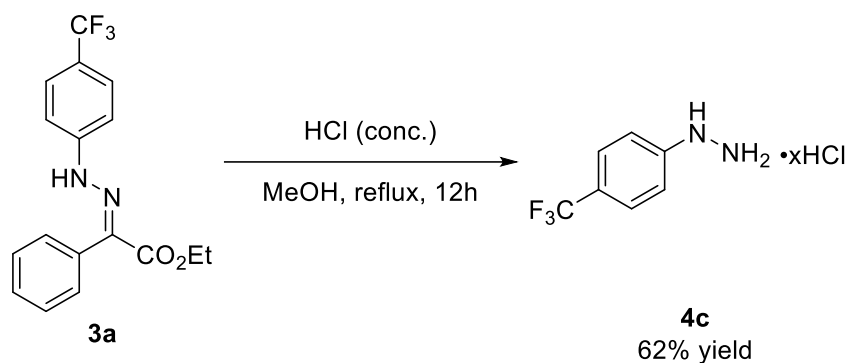

To a 25 mL round-bottom flask equipped with a condenser and a magnetic stirrer were added **3a** (0.1 mmol, 33.6 mg) and 3 mL of MeOH. Then 100 μL of conc. HCl was added slowly. The reaction mixture was warmed up to 80 °C and stirred for 12 h. After cooling to room temperature, the reaction mixture was quenched with water (5 mL). And ethyl acetate (10 mL × 3) was added, the solvent was removed under reduced pressure. After H<sub>2</sub>O was removed, the colorless solid precipitated out of the solvent. The solid residues were washed three times with Et<sub>2</sub>O (10 mL × 3), dried over anhydrous MgSO<sub>4</sub>, and concentrated under vacuum. The residue was purified by column chromatography on silica gel with a gradient eluent of petroleum/ethyl acetate to afford the desired product **4c** (13.1 mg, 62% yield, beige solid). <sup>1</sup>H NMR was in agreement with the literature<sup>[4]</sup>.

#### 4.6. Procedure for synthesis of compound 4d

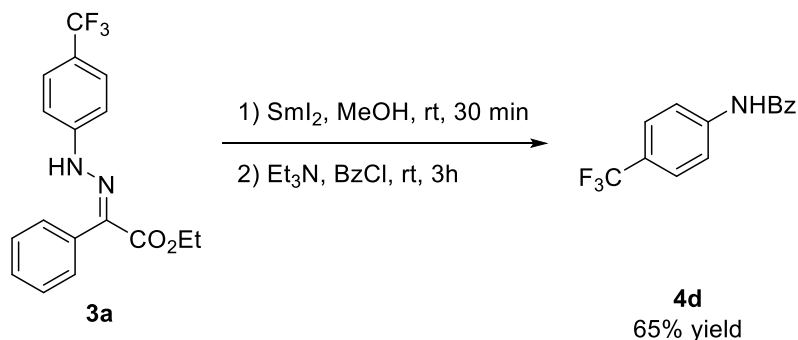

**Step A :** To a 25 mL round bottomed flask equipped with a magnetic stirrer, it was vacuumed and flushed with N<sub>2</sub> and repeated for three times. To the flask, 33.6 mg (0.1

mmol) of **3a**, 3 mL of anhydrous MeOH was added. Then, a solution of samarium(II) iodide (5 mL of a 0.1 M solution in THF) was added rapidly dropwise. The solution maintained blue for a few minutes. After complete addition, the reaction was allowed to stir for 30 min. The solution was concentrated to afford a yellow oil which was used for the next step without further purification. **Step B** : To the above oil, 3 mL (0.1 M) of THF, 35  $\mu$ L (1.211 g/mL, 0.3 mmol) of BzCl, and 54  $\mu$ L (0.728 g/mL, 0.4 mmol) of Et<sub>3</sub>N were added, followed by 3 h stirring. The mixture was quenched with water (10 mL) and then extracted with EtOAc (10 mL  $\times$  4). The combined organic layers were dried over anhydrous MgSO<sub>4</sub>, filtered, and concentrated by rotary evaporation. The residue was purified by column chromatography on silica gel with a gradient eluent of petroleum/ethyl acetate to afford the desired product **4d** (17.2 mg, 65% yield). <sup>1</sup>H NMR was in agreement with the literature<sup>[5]</sup>.

#### 4.7. Comparison reactions

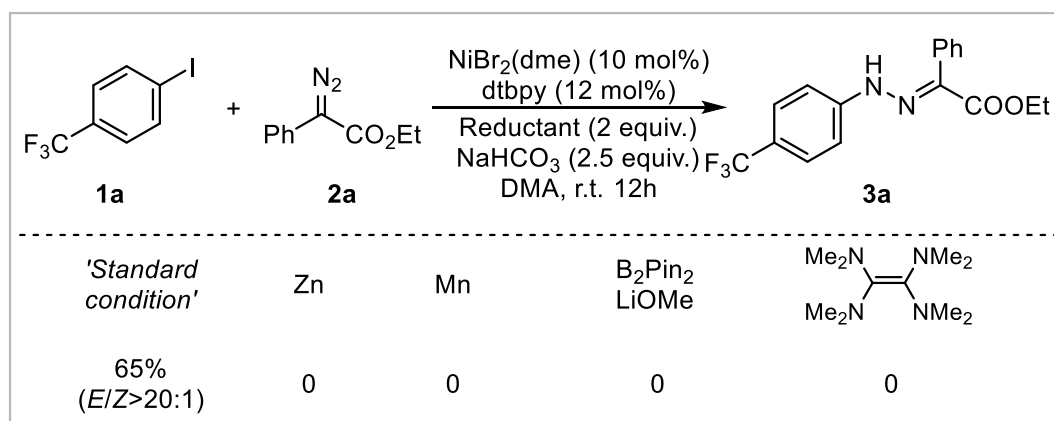

In the nitrogen filled glovebox, a 10 mL oven-dried Schlenk tube with a magnetic bar was charged with NiBr<sub>2</sub>•DME (0.02 mmol, 10 mol%), dtbpy (0.024 mmol, 12 mol%), NaHCO<sub>3</sub> (0.5 mmol, 42.0 mg, 2.5 equiv.), HEH (0.4 mmol, 101.2 mg, 2 equiv.) and 4CzIPN (0.002 mmol, 1 mol%). The tube was capped with a septum and took out of the glove box. Under N<sub>2</sub> atmosphere, anhydrous DMA (4 mL), aryl halide (0.2 mmol) and aryl diazoacetate (0.4 mmol, 2 equiv.) were added to the reaction vial, then it was immediately set to stir at 800 rpm and irradiated by 30 W blue LEDs for 12 h. Upon completed, the mixture was diluted with EtOAc and n-Dodecane as a GC internal standard was added. The yield was determined by GC analysis.

#### 4.8. Origin of Z/E-selectivity: time study

According to General Procedure (SI 4.1), the reaction was stopped at different time points. The yield was determined by <sup>1</sup>H NMR with use CH<sub>2</sub>Br<sub>2</sub> as an internal

standard. Z:E ratios were determined using crude products via  $^1\text{H}$  NMR.

Table S9 time study

| Entry | Time    | Yield (%) | E:Z( <b>3a</b> ) |
|-------|---------|-----------|------------------|
| 1     | 4 hour  | 28        | 1:2              |
| 2     | 8 hour  | 45        | 3:1              |
| 3     | 12 hour | 70        | >20:1            |

| Entry | Time    | Yield (%) | Z:E( <b>3h</b> ) |
|-------|---------|-----------|------------------|
| 1     | 4 hour  | 18        | 2:1              |
| 2     | 8 hour  | 33        | 16:1             |
| 3     | 12 hour | 54        | >20:1            |

## 5. Mechanism Studies.

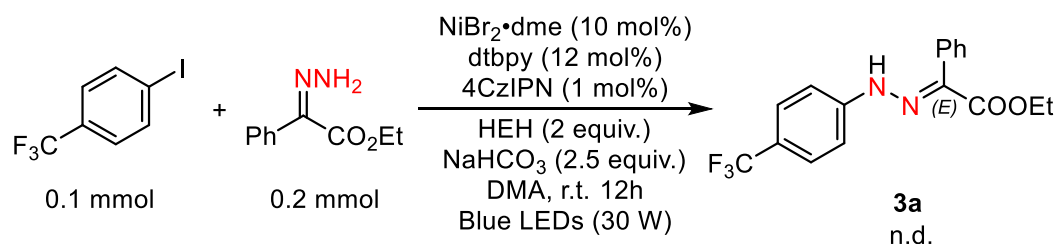

In the nitrogen filled glovebox, a 10 mL oven-dried Schlenk tube with a magnetic bar was charged with  $\text{NiBr}_2\cdot\text{DME}$  (0.01 mmol, 10 mol%), dtbpy (0.012 mmol, 12 mol%),  $\text{NaHCO}_3$  (0.25 mmol, 21.0 mg, 2.5 equiv.), HEH (0.2 mmol, 50.6 mg, 2 equiv.) and 4CzIPN (0.001 mmol, 1 mol%). The tube was capped with a septum and took out of the glove box. Under  $\text{N}_2$  atmosphere, anhydrous DMA (2 mL), aryl halide (0.1 mmol) and *E*-hydrazine (0.2 mmol, 2 equiv.) were added to the reaction vial, then it was immediately set to stir at 800 rpm and irradiated by 30 W blue LEDs for 12 h. The reaction mixture was quenched by saturated NaCl aqueous solution before the internal

standard (dodecane) was added to the reaction vial, and extracted with ethyl acetate (2 mL × 2). The crude product was submitted to GC for analysis.

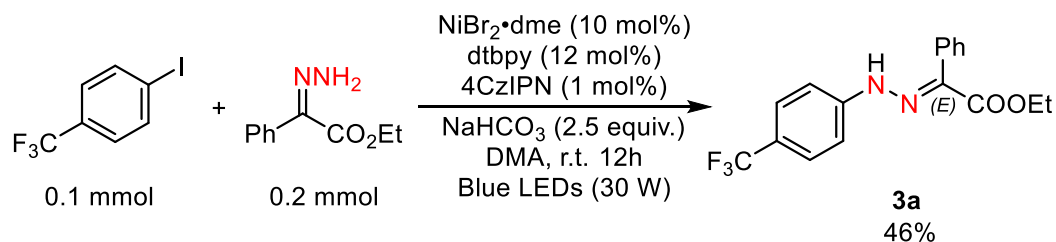

In the nitrogen filled glovebox, a 10 mL oven-dried Schlenk tube with a magnetic bar was charged with  $\text{NiBr}_2 \cdot \text{DME}$  (0.01 mmol, 10 mol%), dtbpy (0.012 mmol, 12 mol%),  $\text{NaHCO}_3$  (0.25 mmol, 21.0 mg, 2.5 equiv.) and 4CzIPN (0.001 mmol, 1 mol%). The tube was capped with a septum and took out of the glove box. Under  $\text{N}_2$  atmosphere, anhydrous DMA (2 mL), aryl halide (0.1 mmol) and *E*-hydrazine (0.2 mmol, 2 equiv.) were added to the reaction vial, then it was immediately set to stir at 800 rpm and irradiated by 30 W blue LEDs for 12 h. The reaction mixture was quenched by saturated  $\text{NaCl}$  aqueous solution (2 mL) and the aqueous layer was extracted with ethyl acetate (2 mL × 3). The combined organic layers were dried over  $\text{MgSO}_4$ , filtered, and concentrated under vacuo. The residue was purified carefully by column chromatography on silica gel with a gradient eluent of petroleum/ethyl acetate affording the product **3a** (30.9 mg, 46% yield, white solid).

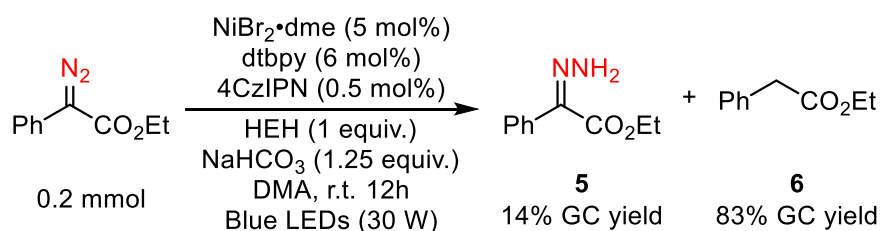

In the nitrogen filled glovebox, a 10 mL oven-dried Schlenk tube with a magnetic bar was charged with  $\text{NiBr}_2 \cdot \text{DME}$  (0.01 mmol, 5 mol%), dtbpy (0.012 mmol, 6 mol%),  $\text{NaHCO}_3$  (0.25 mmol, 21.0 mg, 1.25 equiv.), HEH (0.2 mmol, 50.6 mg, 1 equiv.) and 4CzIPN (0.001 mmol, 0.5 mol%). The tube was capped with a septum and took out of the glove box. Under  $\text{N}_2$  atmosphere, anhydrous DMA (2 mL), aryl diazoacetate (0.2 mmol) were added to the reaction vial, then it was immediately set to stir at 800 rpm and irradiated by 30 W blue LEDs for 12 h. The reaction mixture was quenched by saturated  $\text{NaCl}$  aqueous solution before the internal standard (dodecane) was added to the reaction vial, and extracted with ethyl acetate (2 mL × 2). The crude product was submitted to GC for analysis.

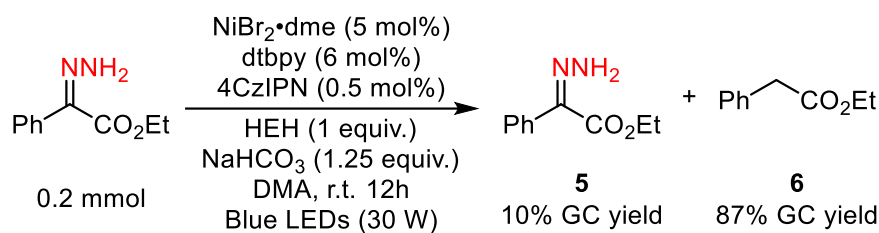

In the nitrogen filled glovebox, a 10 mL oven-dried Schlenk tube with a magnetic bar was charged with NiBr<sub>2</sub>•DME (0.01 mmol, 5 mol%), dtbpy (0.012 mmol, 12 mol%), NaHCO<sub>3</sub> (0.25 mmol, 21.0 mg, 1.25 equiv.), HEH (0.2 mmol, 50.6 mg, 1 equiv.) and 4CzIPN (0.001 mmol, 0.5 mol%). The tube was capped with a septum and took out of the glove box. Under N<sub>2</sub> atmosphere, anhydrous DMA (2 mL), *E*-hydrazine (0.2 mmol) were added to the reaction vial, then it was immediately set to stir at 800 rpm and irradiated by 30 W blue LEDs for 12 h. The reaction mixture was quenched by saturated NaCl aqueous solution before the internal standard (dodecane) was added to the reaction vial, and extracted with ethyl acetate (2 mL ×2). The crude product was submitted to GC for analysis.

## 6. The Characterization of the New Products

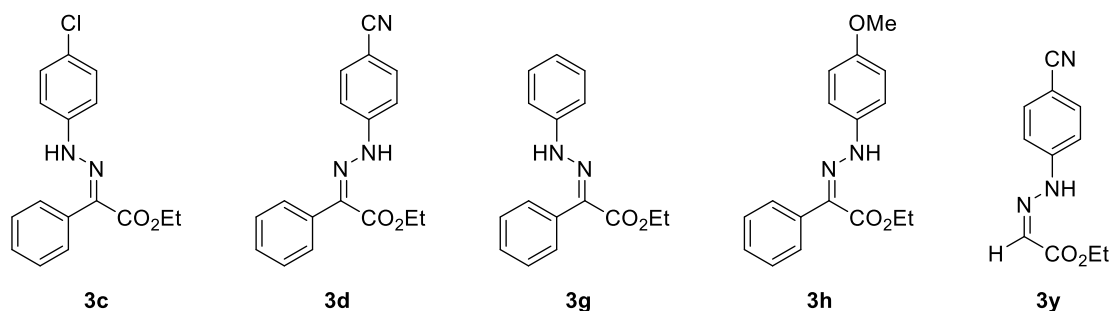

Compounds **3c**<sup>[6]</sup>, **3d**<sup>[7]</sup>, **3g**<sup>[8]</sup>, **3h**<sup>[7]</sup>, **3y**<sup>[9]</sup> were synthesized according to General Procedure (SI 4.1), and purified by column chromatography on silica gel with a gradient eluent of petroleum/ethyl acetate. The spectral data match those previously reported.

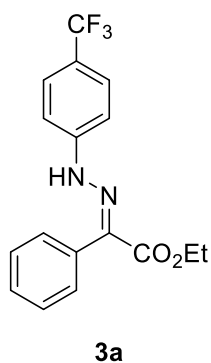

The title compound **3a** was synthesized according to General Procedure (SI 4.1), and purified by column chromatography on silica gel with a gradient eluent of petroleum/ethyl acetate (43.6 mg, 65% yield, white solid).  $^1\text{H}$  NMR (400 MHz,  $\text{CDCl}_3$ )  $\delta$  8.18 (s, 1H), 7.55 (m, 5H), 7.40 – 7.30 (m, 2H), 7.19 (d,  $J = 8.4$  Hz, 2H), 4.34 (q,  $J = 7.1$  Hz, 2H), 1.37 (t,  $J = 7.1$  Hz, 3H).  $^{13}\text{C}$  NMR (101 MHz,  $\text{CDCl}_3$ )  $\delta$  164.14, 145.35, 136.64, 129.90, 129.56, 129.44, 128.84, 126.62 (q,  $J = 3.8$  Hz), 123.86 (q,  $J = 32.7$  Hz), 121.65 (q,  $J = 273.2$  Hz), 113.73, 61.53, 14.27. HRMS:  $m/z$  (ESI) calculated  $[\text{M}+\text{Na}]^+$ :359.0983, found: 359.0980.

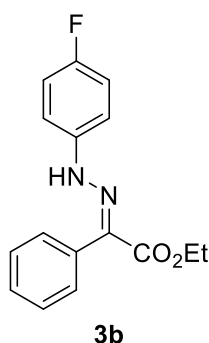

The title compound **3b** was synthesized according to General Procedure (SI 4.1), and purified by column chromatography on silica gel with a gradient eluent of petroleum/ethyl acetate (34.8 mg, 61% yield, white solid).  $^1\text{H}$  NMR (400 MHz,  $\text{CDCl}_3$ )  $\delta$  8.05 (s, 1H), 7.61 – 7.45 (m, 3H), 7.39 – 7.30 (m, 2H), 7.13 – 7.04 (m, 2H), 6.98 (t,  $J = 8.6$  Hz, 2H), 4.33 (q,  $J = 7.1$  Hz, 2H), 1.36 (t,  $J = 7.1$  Hz, 3H).  $^{13}\text{C}$  NMR (101 MHz,  $\text{CDCl}_3$ )  $\delta$  164.41, 158.44 (d,  $J = 239.9$  Hz), 139.01, 134.57, 129.82, 129.63, 129.49, 128.99, 115.92 (d,  $J = 22.8$  Hz), 115.17 (d,  $J = 7.9$  Hz), 61.30, 14.32. HRMS:  $m/z$  (ESI) calculated  $[\text{M}+\text{Na}]^+$ :309.1015, found: 309.1010.

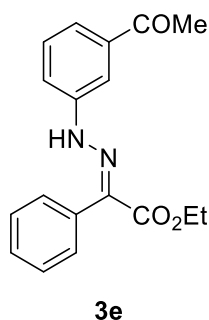

The title compound **3e** was synthesized according to General Procedure (SI 4.1), and purified by column chromatography on silica gel with a gradient eluent of petroleum/ethyl acetate (43.1 mg, 66% yield, yellow solid).  $^1\text{H}$  NMR (600 MHz,  $\text{CDCl}_3$ )  $\delta$  8.17 (s, 1H), 7.59 – 7.49 (m, 6H), 7.42 – 7.38 (m, 1H), 7.36 – 7.33 (m, 2H), 4.34 (q,  $J = 7.1$  Hz, 2H), 2.59 (s, 3H), 1.37 (t,  $J = 7.1$  Hz, 3H).  $^{13}\text{C}$  NMR (151 MHz,  $\text{CDCl}_3$ )  $\delta$

197.9, 164.3, 143.1, 138.0, 135.7, 129.8, 129.7, 129.6, 129.6, 128.9, 122.2, 118.5, 113.3, 61.4, 26.7, 14.3. HRMS:  $m/z$  (ESI) calculated  $[M+Na]^+$ :333.1215, found: 333.1197.

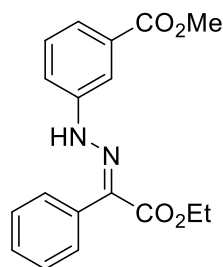

**3f**

The title compound **3f** was synthesized according to General Procedure (**SI 4.1**), and purified by column chromatography on silica gel with a gradient eluent of petroleum/ethyl acetate (43.9 mg, 67% yield, yellow solid).  $^1\text{H}$  NMR (600 MHz,  $\text{CDCl}_3$ )  $\delta$  8.16 (s, 1H), 7.62 (d,  $J = 7.7$  Hz, 1H), 7.59 (d,  $J = 2.1$  Hz, 1H), 7.56 (t,  $J = 7.5$  Hz, 2H), 7.53 – 7.48 (m, 2H), 7.40 – 7.32 (m, 3H), 4.34 (q,  $J = 7.1$  Hz, 2H), 3.89 (s, 3H), 1.37 (t,  $J = 7.1$  Hz, 3H).  $^{13}\text{C}$  NMR (151 MHz,  $\text{CDCl}_3$ )  $\delta$  166.8, 164.3, 142.9, 135.6, 131.1, 129.7, 129.6, 129.5, 129.5, 128.9, 123.1, 118.3, 114.9, 61.4, 52.1, 14.3. HRMS:  $m/z$  (ESI) calculated  $[M+Na]^+$ :349.1164, found: 349.1151.

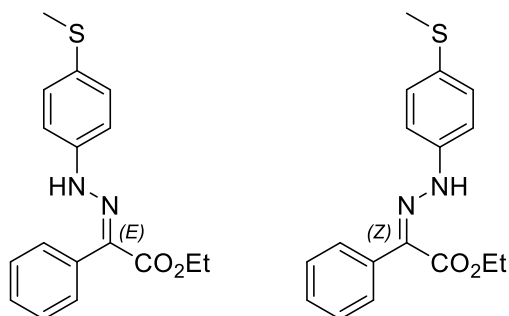

**E-3i**

**Z-3i**

The title compound **3i** was synthesized according to General Procedure (**SI 4.1**), and purified by column chromatography on silica gel with a gradient eluent of petroleum/ethyl acetate (33.3 mg, 53% yield, E/Z= 3:1, yellow solid).  $^1\text{H}$  NMR (600 MHz,  $\text{CDCl}_3$ )  $\delta$  12.44 (s, 0.24H), 8.08 (s, 0.76H), 7.67 – 7.63 (m, 0.50H), 7.54 (t,  $J = 7.5$  Hz, 1.55H), 7.51 – 7.46 (m, 0.77H), 7.38 (t,  $J = 7.6$  Hz, 0.57H), 7.35 – 7.31 (m, 1.81H), 7.27 (dd,  $J = 7.3, 5.2$  Hz, 0.65H), 7.24 – 7.20 (m, 2.09H), 7.11 – 7.05 (m, 1.60H), 4.34 (m, 2.12H), 2.46 (s, 0.78H), 2.44 (s, 2.26H), 1.36 (m, 3.18H).  $^{13}\text{C}$  NMR (101 MHz,  $\text{CDCl}_3$ )  $\delta$  164.37, 163.72, 141.40, 140.86, 136.40, 134.55, 130.96, 130.68, 129.78, 129.57, 129.44, 129.30, 129.27, 128.97, 128.56, 128.00, 127.82, 127.53,



114.80, 114.64, 61.25, 61.03, 29.65, 17.43, 14.29, 14.13. HRMS:  $m/z$  (ESI) calculated  $[M+Na]^+$ :337.0987, found:337.0974.

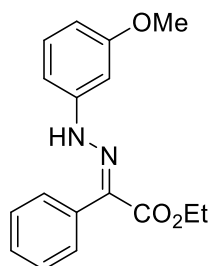

**3j**

The title compound **3j** was synthesized according to General Procedure (**SI 4.1**), and purified by column chromatography on silica gel with a gradient eluent of petroleum/ethyl acetate (17.8 mg, 30% yield, white solid).  $^1\text{H}$  NMR (400 MHz,  $\text{CDCl}_3$ )  $\delta$  8.07 (s, 1H), 7.61 – 7.44 (m, 3H), 7.38 – 7.30 (m, 2H), 7.15 (t,  $J = 8.1$  Hz, 1H), 6.79 (t,  $J = 2.3$  Hz, 1H), 6.63 (d,  $J = 8.1$  Hz, 1H), 6.51 (dd,  $J = 8.1, 2.5$  Hz, 1H), 4.33 (q,  $J = 7.1$  Hz, 2H), 3.81 (s, 3H), 1.36 (t,  $J = 7.1$  Hz, 3H).  $^{13}\text{C}$  NMR (101 MHz,  $\text{CDCl}_3$ )  $\delta$  164.6, 160.8, 144.0, 134.6, 130.1, 129.9, 129.6, 129.5, 129.0, 108.1, 106.6, 99.8, 61.3, 55.3, 14.3. HRMS:  $m/z$  (ESI) calculated  $[M+Na]^+$ :321.1215, found: 321.1210.

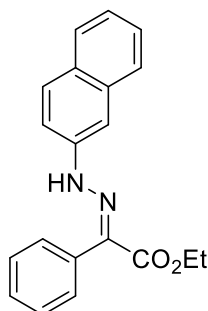

**3k**

The title compound **3k** was synthesized according to General Procedure (**SI 4.1**), and purified by column chromatography on silica gel with a gradient eluent of petroleum/ethyl acetate (30.5 mg, 48% yield, yellow solid).  $^1\text{H}$  NMR (400 MHz,  $\text{CDCl}_3$ )  $\delta$  8.28 (s, 1H), 7.82 – 7.67 (m, 3H), 7.62 – 7.48 (m, 3H), 7.48 – 7.35 (m, 5H), 7.32 (t,  $J = 7.5$  Hz, 1H), 4.36 (q,  $J = 7.2$  Hz, 2H), 1.39 (t,  $J = 7.2$  Hz, 3H).  $^{13}\text{C}$  NMR (101 MHz,  $\text{CDCl}_3$ )  $\delta$  164.5, 140.3, 134.9, 134.2, 129.9, 129.9, 129.7, 129.5, 129.4, 129.1, 127.8, 126.9, 126.7, 123.9, 115.5, 109.2, 61.4, 14.4. HRMS:  $m/z$  (ESI) calculated  $[M+Na]^+$ :341.1266, found: 341.1260.

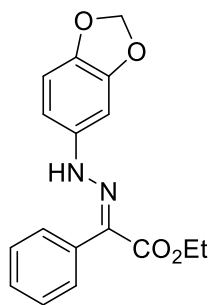

**3l**

The title compound **3l** was synthesized according to General Procedure (SI 4.1), and purified by column chromatography on silica gel with a gradient eluent of petroleum/ethyl acetate (25.3 mg, 40% yield, yellow solid).  $^1\text{H}$  NMR (600 MHz,  $\text{CDCl}_3$ )  $\delta$  8.02 (s, 1H), 7.54 (dd,  $J = 8.1, 6.8$  Hz, 2H), 7.50 – 7.44 (m, 1H), 7.35 – 7.30 (m, 2H), 6.89 (d,  $J = 2.2$  Hz, 1H), 6.69 (d,  $J = 8.4$  Hz, 1H), 6.40 (dd,  $J = 8.4, 2.2$  Hz, 1H), 5.93 (s, 2H), 4.32 (q,  $J = 7.1$  Hz, 2H), 1.36 (t,  $J = 7.1$  Hz, 3H).  $^{13}\text{C}$  NMR (151 MHz,  $\text{CDCl}_3$ )  $\delta$  164.5, 148.6, 142.9, 138.1, 133.6, 129.9, 129.5, 129.5, 129.0, 108.3, 106.3, 101.1, 96.7, 61.2, 14.3. HRMS:  $m/z$  (ESI) calculated  $[\text{M}+\text{Na}]^+$ :335.1008, found: 335.1002.

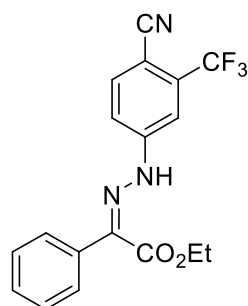

**3m**

The title compound **3m** was synthesized according to General Procedure (SI 4.1), and purified by column chromatography on silica gel with a gradient eluent of petroleum/ethyl acetate (41.4 mg, 57% yield, yellow solid).  $^1\text{H}$  NMR (400 MHz,  $\text{CDCl}_3$ )  $\delta$  12.57 (s, 1H), 7.73 (d,  $J = 8.6$  Hz, 1H), 7.68 – 7.55 (m, 3H), 7.43 (m, 4H), 4.41 (q,  $J = 7.1$  Hz, 2H), 1.38 (t,  $J = 7.2$  Hz, 3H).  $^{13}\text{C}$  NMR (151 MHz,  $\text{CDCl}_3$ )  $\delta$  163.42, 146.70, 136.18, 135.10, 134.51 (q,  $J = 33.0$  Hz), 133.34, 128.77, 128.74, 128.11, 122.28 (q,  $J = 273.8$  Hz), 116.22, 116.16, 111.98 (q,  $J = 5.4$  Hz), 101.39, 62.03, 14.04. HRMS:  $m/z$  (ESI) calculated  $[\text{M}+\text{Na}]^+$ :384.0936, found: 384.0930.

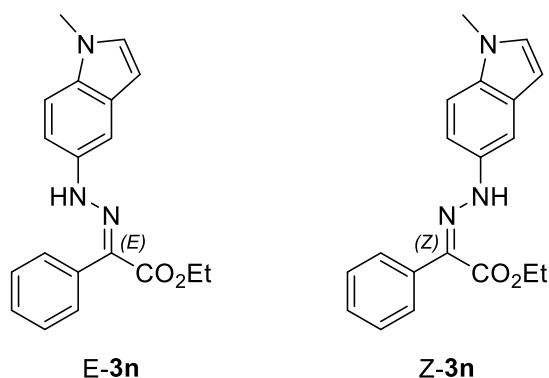

The title compound **3n** was synthesized according to General Procedure (SI 4.1), and purified by column chromatography on silica gel with a gradient eluent of petroleum/ethyl acetate (30.8 mg, 48% yield, E/Z = 10:1, yellow solid). <sup>1</sup>H NMR (400 MHz, CDCl<sub>3</sub>) δ 12.63 (s, 0.09H), 8.20 (s, 0.91H), 7.70 (d, *J* = 7.6 Hz, 0.20H), 7.60 – 7.43 (m, 2.99H), 7.42 – 7.31 (m, 3.14H), 7.22 (d, *J* = 8.8 Hz, 1.04H), 7.09 (dd, *J* = 8.8, 2.2 Hz, 0.98H), 7.01 (d, *J* = 3.0 Hz, 1.08H), 6.49-6.34 (m, 0.98H), 4.34 (m, 2.19H), 3.75 (d, 3.20H), 1.37 (m, *J* = 7.1 Hz, 3.58H). <sup>13</sup>C NMR (101 MHz, CDCl<sub>3</sub>) δ 164.79, 163.98, 137.09, 136.17, 133.62, 132.44, 130.36, 129.72, 129.39, 129.27, 128.90, 128.58, 127.96, 127.77, 127.08, 127.00, 110.48, 110.23, 109.82, 109.78, 105.46, 105.22, 100.75, 100.57, 61.03, 60.68, 32.94, 31.91, 31.61, 29.68, 29.34, 22.68, 14.40, 14.10. HRMS: *m/z* (ESI) calculated [M+Na]<sup>+</sup>:344.1375, found:344.1380.

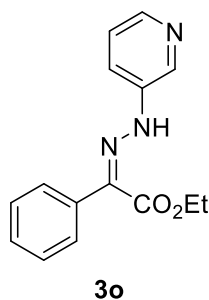

The title compound **3o** was synthesized according to General Procedure (SI 4.1), and purified by column chromatography on silica gel with a gradient eluent of petroleum/ethyl acetate (16.7 mg, 31% yield, yellow solid). <sup>1</sup>H NMR (400 MHz, CDCl<sub>3</sub>) δ 12.39 (s, 1H), 8.53 (d, *J* = 2.6 Hz, 1H), 8.25 (d, *J* = 4.7 Hz, 1H), 7.65 (d, *J* = 7.6 Hz, 3H), 7.39 (m, 3H), 7.24 (m, 1H), 4.38 (q, *J* = 7.1 Hz, 2H), 1.38 (t, *J* = 7.0 Hz, 3H). <sup>13</sup>C NMR (101 MHz, CDCl<sub>3</sub>) δ 163.7, 143.6, 139.6, 136.9, 136.0, 128.6, 128.0, 127.9, 123.9, 120.8, 93.9, 61.4, 14.1. HRMS: *m/z* (ESI) calculated [M+Na]<sup>+</sup>:292.1062, found: 292.1065.

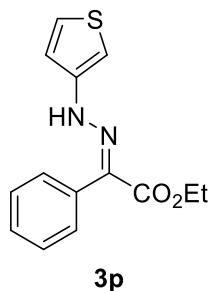

The title compound **3p** was synthesized according to General Procedure (SI 4.1), and purified by column chromatography on silica gel with a gradient eluent of petroleum/ethyl acetate (20.2 mg, 37% yield, yellow solid). <sup>1</sup>H NMR (400 MHz, CDCl<sub>3</sub>) δ 8.17 (s, 1H), 7.59 – 7.43 (m, 3H), 7.33 (d, *J* = 7.4 Hz, 2H), 7.22 (dd, *J* = 5.2, 3.2 Hz, 1H), 6.95 (d, *J* = 5.2 Hz, 1H), 6.69 (d, *J* = 3.2 Hz, 1H), 4.31 (q, *J* = 7.1 Hz, 2H), 1.35 (t, *J* = 7.1 Hz, 3H). <sup>13</sup>C NMR (101 MHz, CDCl<sub>3</sub>) δ 164.4, 142.8, 134.3, 129.8, 129.5, 129.4, 129.0, 125.8, 118.3, 102.3, 61.2, 14.3. HRMS: *m/z* (ESI) calculated [M+Na]<sup>+</sup>:297.0674, found: 297.0660.

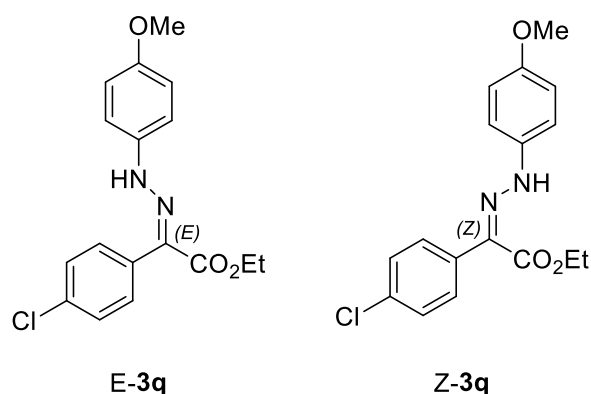

The title compound **3q** was synthesized according to General Procedure (SI 4.1), and purified by column chromatography on silica gel with a gradient eluent of petroleum/ethyl acetate (35.8 mg, 54% yield, E/Z = 5:1, yellow oil). <sup>1</sup>H NMR (600 MHz, CDCl<sub>3</sub>) δ 12.50 (s, 0.16H), 7.99 (s, 0.84H), 7.59 (d, *J* = 8.6 Hz, 0.33H), 7.53 – 7.48 (m, 1.59H), 7.35 – 7.31 (m, 0.43H), 7.31 – 7.27 (m, 1.60H), 7.23 – 7.20 (m, 0.40H), 7.10 – 7.06 (m, 1.65H), 6.91 – 6.87 (m, 0.34H), 6.86 – 6.81 (m, 1.64H), 4.33 (m, 2.04H), 3.80 (s, 0.56H), 3.77 (s, 2.42H), 1.35 (m, 3.05H). <sup>13</sup>C NMR (151 MHz, CDCl<sub>3</sub>) δ 164.31, 163.62, 155.68, 155.40, 136.86, 136.35, 135.49, 135.19, 131.98, 130.64, 129.77, 129.74, 128.69, 128.36, 127.95, 127.85, 115.45, 115.31, 114.72, 114.63, 61.24, 60.95, 55.58, 55.55, 14.32, 14.17. HRMS: *m/z* (ESI) calculated [M+Na]<sup>+</sup>:355.0825, found: 355.0820.

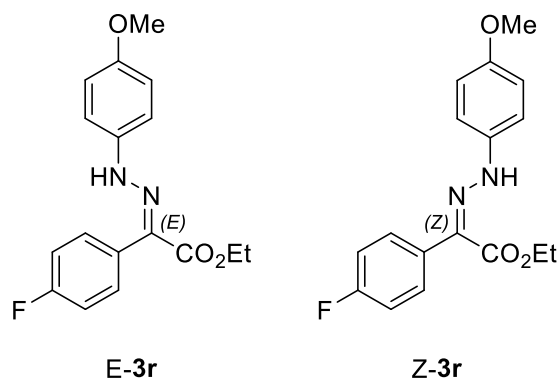

The title compound **3r** was synthesized according to General Procedure (**SI 4.1**), and purified by column chromatography on silica gel with a gradient eluent of petroleum/ethyl acetate (35.4 mg, 56% yield, E/Z = 9:1, yellow solid).  $^1\text{H}$  NMR (600 MHz,  $\text{CDCl}_3$ )  $\delta$  12.47 (s, 0.1H), 7.97 (s, 0.89H), 7.62 (m, 0.25H), 7.33 (ddd,  $J = 8.8, 5.3, 1.8$  Hz, 1.87H), 7.23 (m, 2.30H), 7.12 – 7.01 (m, 2.26H), 6.92 – 6.79 (m, 2.17H), 4.32 (m, 2.12H), 3.80 (d,  $J = 1.6$  Hz, 0.35H), 3.78 (d,  $J = 1.6$  Hz, 2.51H), 1.36 (m, 3.36H).  $^{13}\text{C}$  NMR (151 MHz,  $\text{CDCl}_3$ )  $\delta$  164.50, 155.35, 136.41, 132.28, 131.26 (d,  $J = 8.8$  Hz), 130.22 (d,  $J = 8.7$  Hz), 125.59, 116.68 (d,  $J = 21.9$  Hz), 115.28, 114.64, 61.23, 55.57, 14.34. HRMS:  $m/z$  (ESI) calculated  $[\text{M}+\text{Na}]^+$ :339.1121, found:339.1129.

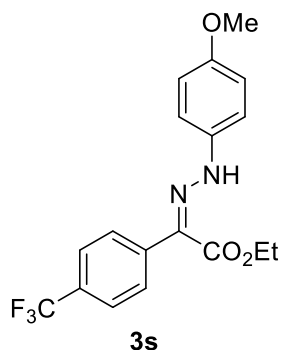

The title compound **3s** was synthesized according to General Procedure (**SI 4.1**), and purified by column chromatography on silica gel with a gradient eluent of petroleum/ethyl acetate (43.9 mg, 60% yield, yellow oil).  $^1\text{H}$  NMR (400 MHz,  $\text{CDCl}_3$ )  $\delta$  12.62 (s, 1H), 7.78 (d,  $J = 8.2$  Hz, 2H), 7.61 (d,  $J = 8.2$  Hz, 2H), 7.25 (d,  $J = 5.6$  Hz, 2H), 6.95 – 6.86 (m, 2H), 4.37 (q,  $J = 7.2$  Hz, 2H), 3.81 (s, 3H), 1.38 (t,  $J = 7.2$  Hz, 3H).  $^{13}\text{C}$  NMR (101 MHz,  $\text{CDCl}_3$ )  $\delta$  163.59, 155.96, 140.21, 136.68, 128.90 (q,  $J = 32.6$  Hz), 128.57, 125.08, 124.72 (q,  $J = 3.8$  Hz), 121.62 (q,  $J = 271.7$  Hz), 115.67, 114.78, 61.06, 55.60, 14.19. HRMS:  $m/z$  (ESI) calculated  $[\text{M}+\text{Na}]^+$ :389.1089, found:389.1092.

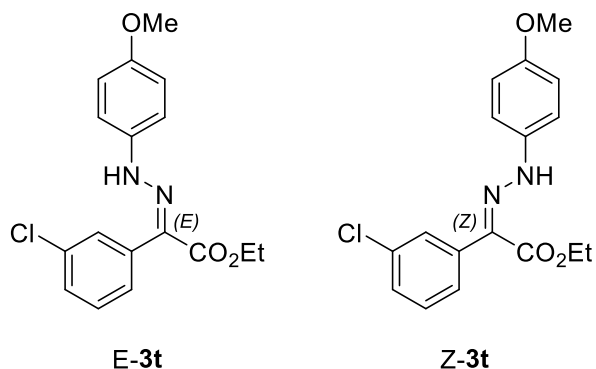

The title compound **3t** was synthesized according to General Procedure (**SI 4.1**), and purified by column chromatography on silica gel with a gradient eluent of petroleum/ethyl acetate (37.2 mg, 56% yield, E/Z = 13:1, yellow solid). <sup>1</sup>H NMR (400 MHz, CDCl<sub>3</sub>) δ 12.55 (s, 0.07H), 7.99 (s, 0.93H), 7.47 (d, *J* = 7.2 Hz, 1.90H), 7.33 (d, *J* = 2.0 Hz, 1.11H), 7.22 (m, 1.03H), 7.13 – 7.03 (m, 1.89H), 6.85 (d, *J* = 8.9 Hz, 1.79H), 4.32 (m, 2.11H), 3.78 (s, 0.31H), 3.8 (s, 2.65H), 1.35 (m, 2.90H). <sup>13</sup>C NMR (101 MHz, CDCl<sub>3</sub>) δ 164.2, 163.6, 155.8, 155.5, 138.5, 136.8, 136.3, 135.5, 133.7, 131.8, 131.6, 130.7, 129.7, 129.3, 128.9, 128.5, 127.3, 127.1, 126.6, 125.1, 115.6, 115.4, 114.7, 114.6, 61.3, 61.0, 55.6, 29.7, 14.3, 14.2. HRMS: *m/z* (ESI) calculated [M+Na]<sup>+</sup>:355.0825, found:355.0832.

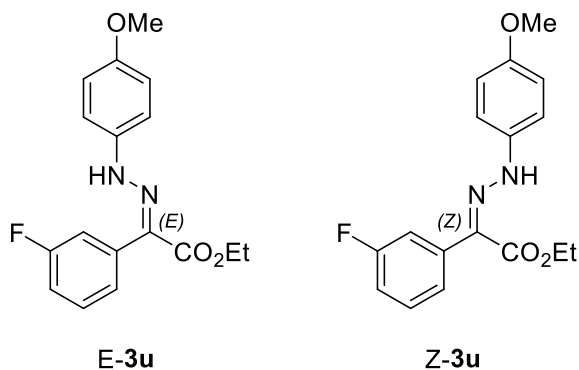

The title compound **3t** was synthesized according to General Procedure (**SI 4.1**), and purified by column chromatography on silica gel with a gradient eluent of petroleum/ethyl acetate (35.4 mg, 56% yield, E/Z = 3:1 yellow solid). <sup>1</sup>H NMR (600 MHz, CDCl<sub>3</sub>) δ 12.54 (s, 0.27H), 8.02 (s, 0.73H), 7.55 – 7.45 (m, 1.08H), 7.42 – 7.28 (m, 0.75H), 7.25 – 7.15 (m, 1.38H), 7.14 – 7.04 (m, 2.99H), 6.99 (m, 0.39H), 6.93 – 6.82 (m, 2.07H), 4.34 (m, 2.07H), 3.79 (d, *J* = 15.2 Hz, 3.03H), 1.37 (m, 3.15H). <sup>13</sup>C NMR (151 MHz, CDCl<sub>3</sub>) δ 164.21, 164.09, 163.61, 162.44, 155.77, 155.44, 136.81, 136.32, 132.05 (d, *J* = 7.7 Hz), 131.71, 131.14 (d, *J* = 8.0 Hz), 129.10 (d, *J* = 8.6 Hz), 125.21 (d, *J* = 3.3 Hz), 124.79 (d, *J* = 3.3 Hz), 124.02 (d, *J* = 2.2 Hz), 116.64, 116.50,

116.35, 115.56, 115.37, 115.20, 114.74, 114.64, 113.93 (d,  $J = 21.8$  Hz), 61.25, 61.00, 55.59, 55.56, 14.32, 14.18. HRMS:  $m/z$  (ESI) calculated  $[M+Na]^+$ :339.1121, found:339.1129.

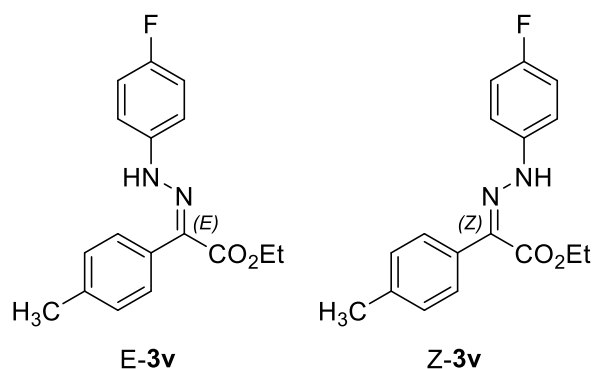

The title compound **3v** was synthesized according to General Procedure (**SI 4.1**), and purified by column chromatography on silica gel with a gradient eluent of petroleum/ethyl acetate (33.6 mg, 56% yield, Z/E = 16:1, yellow oil).  $^1\text{H}$  NMR (600 MHz,  $\text{CDCl}_3$ )  $\delta$  12.38 (s, 0.94H), 8.07 (s, 0.06H), 7.58 – 7.50 (m, 1.79H), 7.34 (s, 0.16H), 7.24 – 7.14 (m, 3.84H), 7.11 – 7.05 (m, 0.18H), 7.04 – 6.93 (m, 1.98H), 4.35 (m, 2.08H), 2.43 (s, 0.22H), 2.38 (s, 2.81H), 1.36 (m, 3.17H).  $^{13}\text{C}$  NMR (151 MHz,  $\text{CDCl}_3$ )  $\delta$  163.88, 158.58 (d,  $J = 240.5$  Hz), 139.66 (d,  $J = 2.4$  Hz), 137.50, 133.64, 128.65, 128.52, 128.04, 115.99 (d,  $J = 23.1$  Hz), 115.18 (d,  $J = 7.8$  Hz), 61.06, 21.24, 14.21. HRMS:  $m/z$  (ESI) calculated  $[M+Na]^+$ :323.1172, found:323.1177.

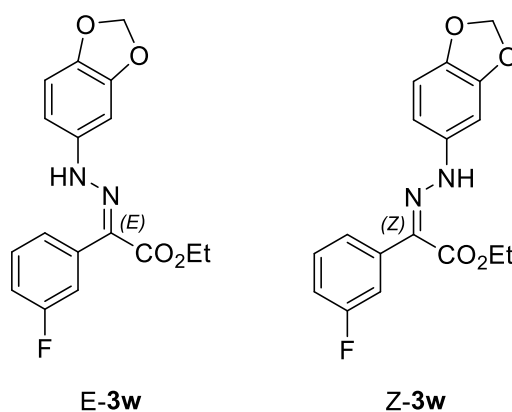

The title compound **3w** was synthesized according to General Procedure (**SI 4.1**), and purified by column chromatography on silica gel with a gradient eluent of petroleum/ethyl acetate (38.9 mg, 59% yield, yellow solid, E/Z = 2:1).  $^1\text{H}$  NMR (400 MHz,  $\text{CDCl}_3$ )  $\delta$  12.51 (s, 0.40H), 8.01 (s, 0.59H), 7.55 – 7.27 (m, 2.30H), 7.09 (m, 3.18H), 6.90 (m, 0.66H), 6.76 (d,  $J = 8.3$  Hz, 0.40H), 6.69 (d,  $J = 8.3$  Hz, 0.65H), 6.62 (dd,  $J = 8.3, 2.2$  Hz, 0.45H), 6.42 (dd,  $J = 8.3, 2.2$  Hz, 0.65H), 5.94 (d,  $J = 7.2$  Hz,

2.13H), 4.44 – 4.24 (m, 2.36H), 1.37 (m, 3.62H). <sup>13</sup>C NMR (101 MHz, CDCl<sub>3</sub>) δ 164.50, 164.12, 163.57, 162.02, 148.71, 148.61, 143.49, 143.19, 138.67 (d, *J* = 8.5 Hz), 138.38, 137.88, 131.92 (d, *J* = 7.7 Hz), 131.16 (d, *J* = 8.4 Hz), 129.13 (d, *J* = 8.4 Hz), 124.72 (d, *J* = 3.2 Hz), 124.03 (d, *J* = 2.5 Hz), 116.76, 116.52 (d, *J* = 5.9 Hz), 116.27, 115.31 (d, *J* = 23.2 Hz), 114.06 (d, *J* = 21.6 Hz), 108.45, 108.31, 107.07, 106.47, 101.20 (d, *J* = 1.6 Hz), 96.78, 96.51, 61.31, 61.09, 29.68, 29.64, 14.31, 14.16. HRMS: *m/z* (ESI) calculated [M+Na]<sup>+</sup>:353.0914, found:353.0917.

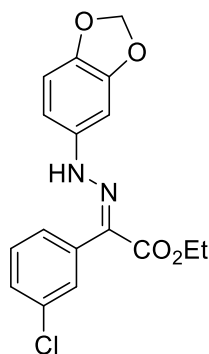

**3x**

The title compound **3x** was synthesized according to General Procedure (SI 4.1), and purified by column chromatography on silica gel with a gradient eluent of petroleum/ethyl acetate (38.0 mg, 55% yield, yellow solid). <sup>1</sup>H NMR (600 MHz, CDCl<sub>3</sub>) δ 7.96 (s, 1H), 7.51 – 7.43 (m, 2H), 7.33 (d, *J* = 2.1 Hz, 1H), 7.21 (d, *J* = 6.7 Hz, 1H), 6.90 (d, *J* = 2.3 Hz, 1H), 6.70 (d, *J* = 8.4 Hz, 1H), 6.43 (dd, *J* = 8.3, 2.3 Hz, 1H), 5.93 (s, 2H), 4.32 (q, *J* = 7.1 Hz, 2H), 1.36 (t, *J* = 7.1 Hz, 3H). <sup>13</sup>C NMR (151 MHz, CDCl<sub>3</sub>) δ 164.1, 148.6, 143.2, 137.8, 135.5, 131.9, 131.7, 130.7, 129.8, 129.3, 127.2, 108.3, 106.5, 101.2, 96.8, 61.3, 14.3. HRMS: *m/z* (ESI) calculated [M+Na]<sup>+</sup>:369.0618, found:369.0614.

## 7. References

- [1] M. Hu, J. Rong, W. Miao, C. Ni, Y. Han, J. Hu, *Org. Lett.* **2014**, *16*, 2030-2033.
- [2] S. H. Kwak, N. Gulia, O. Daugulis, *J. Org. Chem.* **2018**, *83*, 5844-5850.
- [3] L. C. Misal Castro, I. Sultan, K. Nishi, H. Tsurugi, K. Mashima, *J. Org. Chem.* **2021**, *86*, 3287-3299.
- [4] A. Mata, D. N. Tran, U. Weigl, J. D. Williams, C. O. Kappe, *Chem. Commun.* **2020**, *56*, 14621-14624.
- [5] G. Li, M. Szostak, *Nat. Commun.* **2018**, *9*, 4165.
- [6] G. Corsi, G. Palazzo, C. Germani, P. Scorza Barcellona, B. Silvestrini, *J. Med. Chem.* **1976**, *19*, 778-783.
- [7] B. Shao, H. Qian, Q. Li, I. Aprahamian, *J. Am. Chem. Soc.* **2019**, *141*, 8364-8371.



- [8] H. Qian, I. Aprahamian, *Chem. Commun.* **2015**, *51*, 11158-11161.
- [9] J.-N. Zhu, W.-K. Wang, J. Zheng, H.-P. Lin, Y.-X. Deng, S.-Y. Zhao, *J. Org. Chem.* **2019**, *84*, 11032-11041.

## 8. The Spectra of the New Products

Compound **3a**  $^1\text{H}$  NMR (400 MHz,  $\text{CDCl}_3$ )

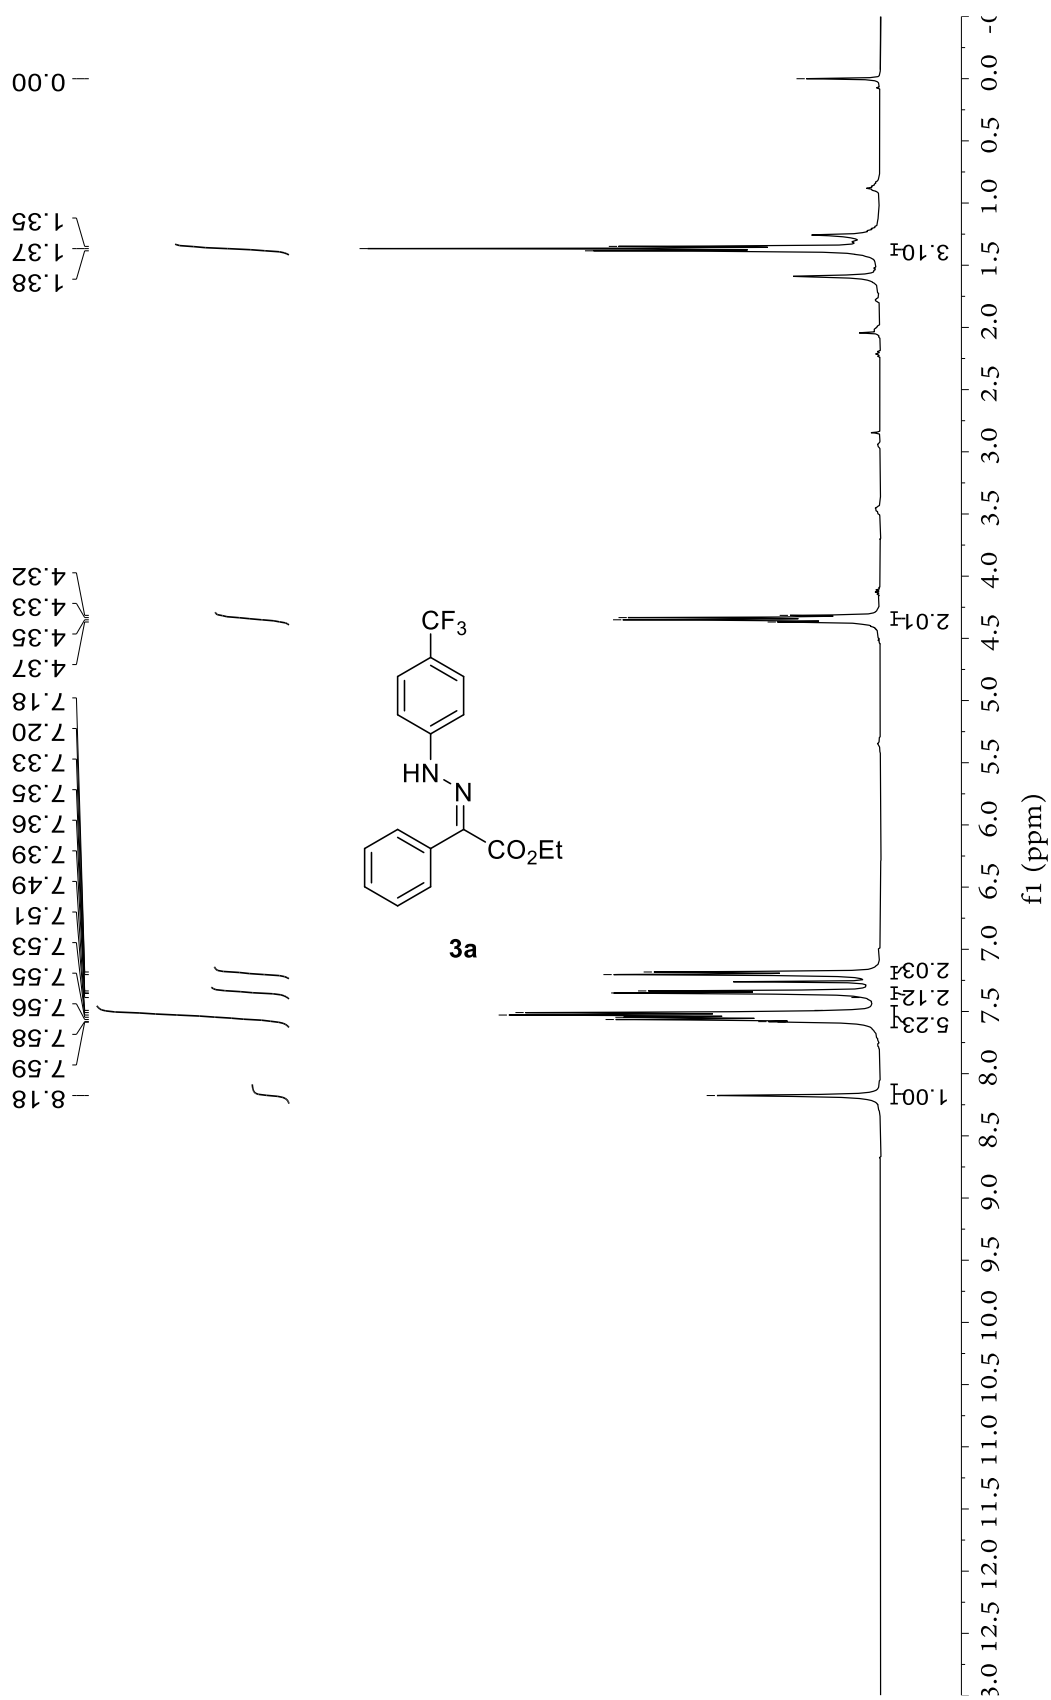

Compound **3a**  $^{13}\text{C}$  NMR (101 MHz,  $\text{CDCl}_3$ )

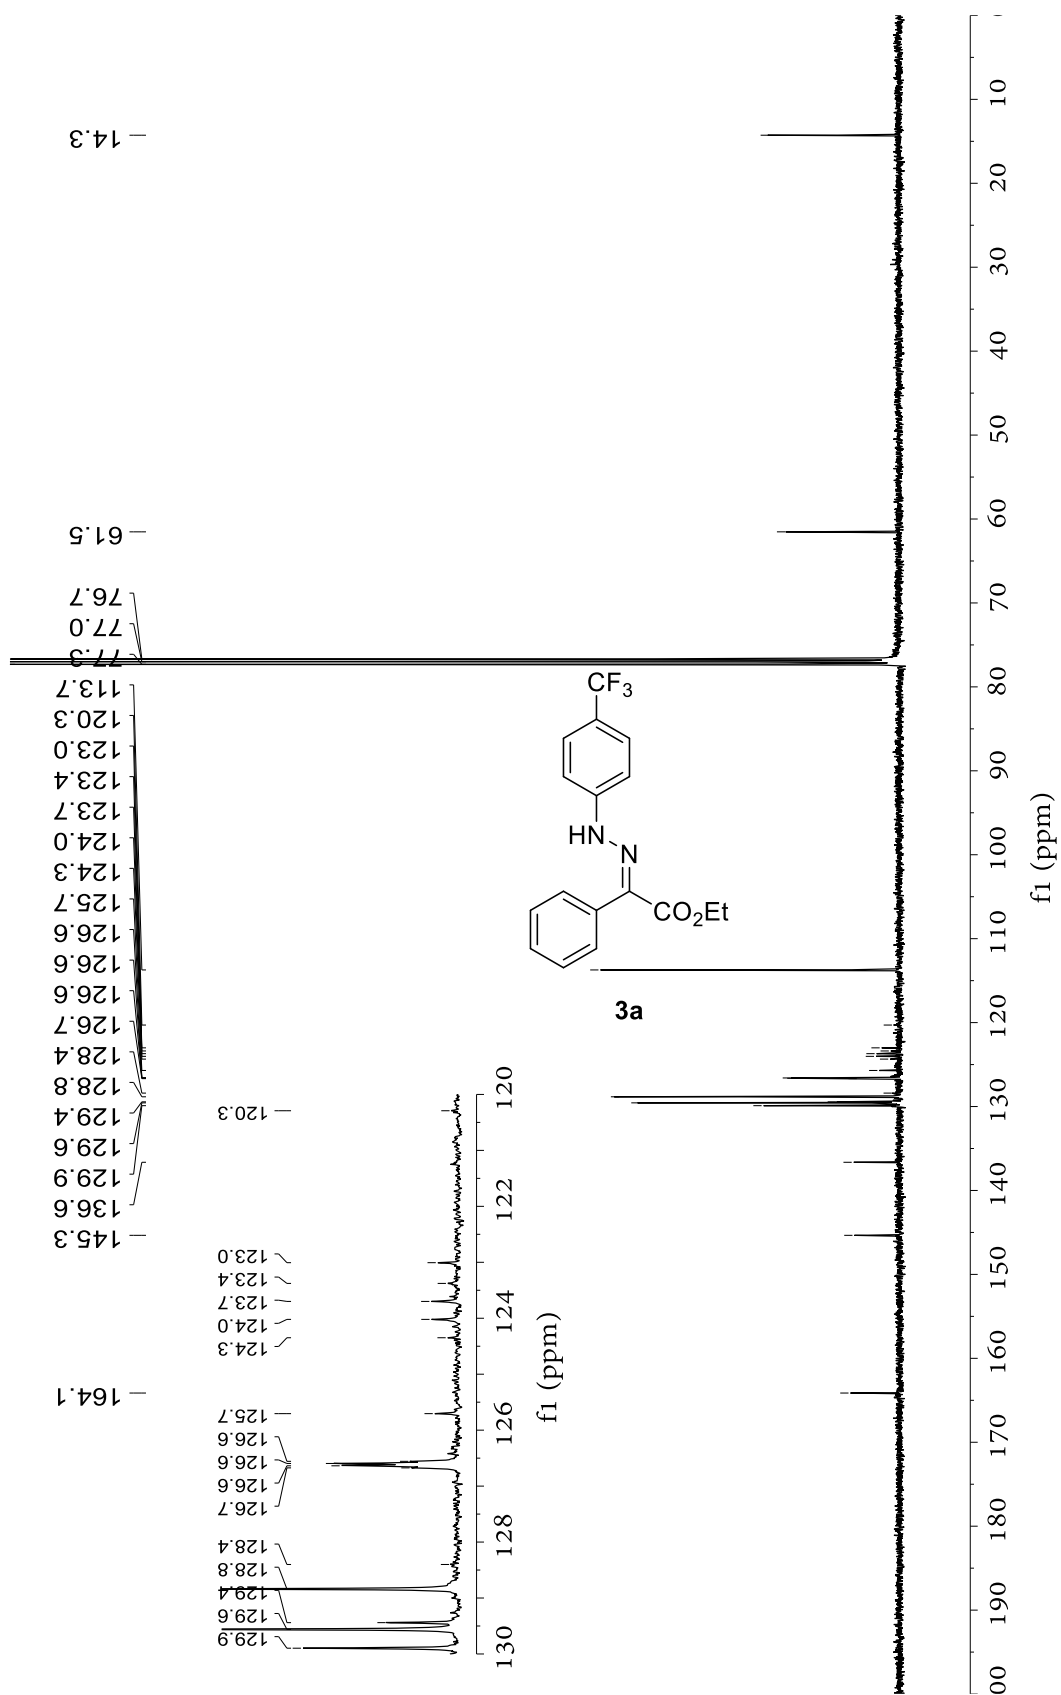

Compound **3a**  $^{19}\text{F}$  NMR (376 MHz,  $\text{CDCl}_3$ )

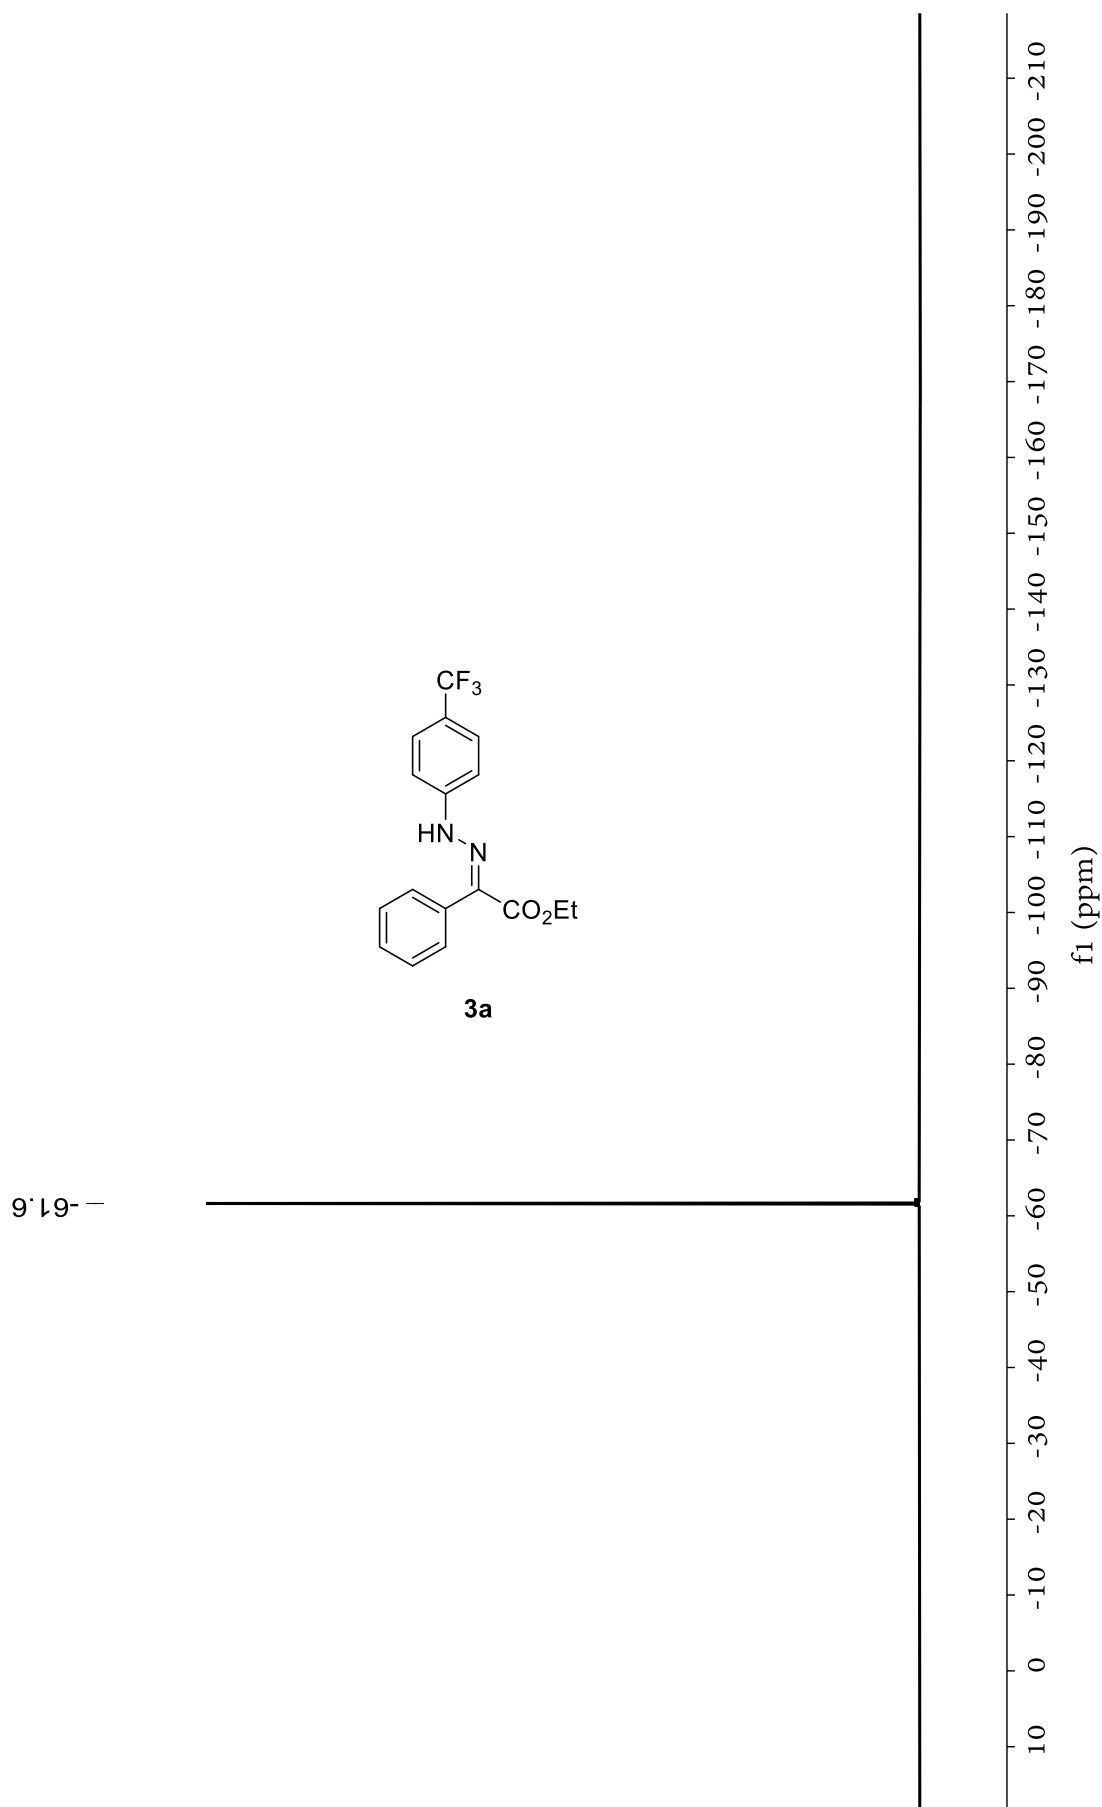

Compound **3b**  $^1\text{H}$  NMR (400 MHz,  $\text{CDCl}_3$ )

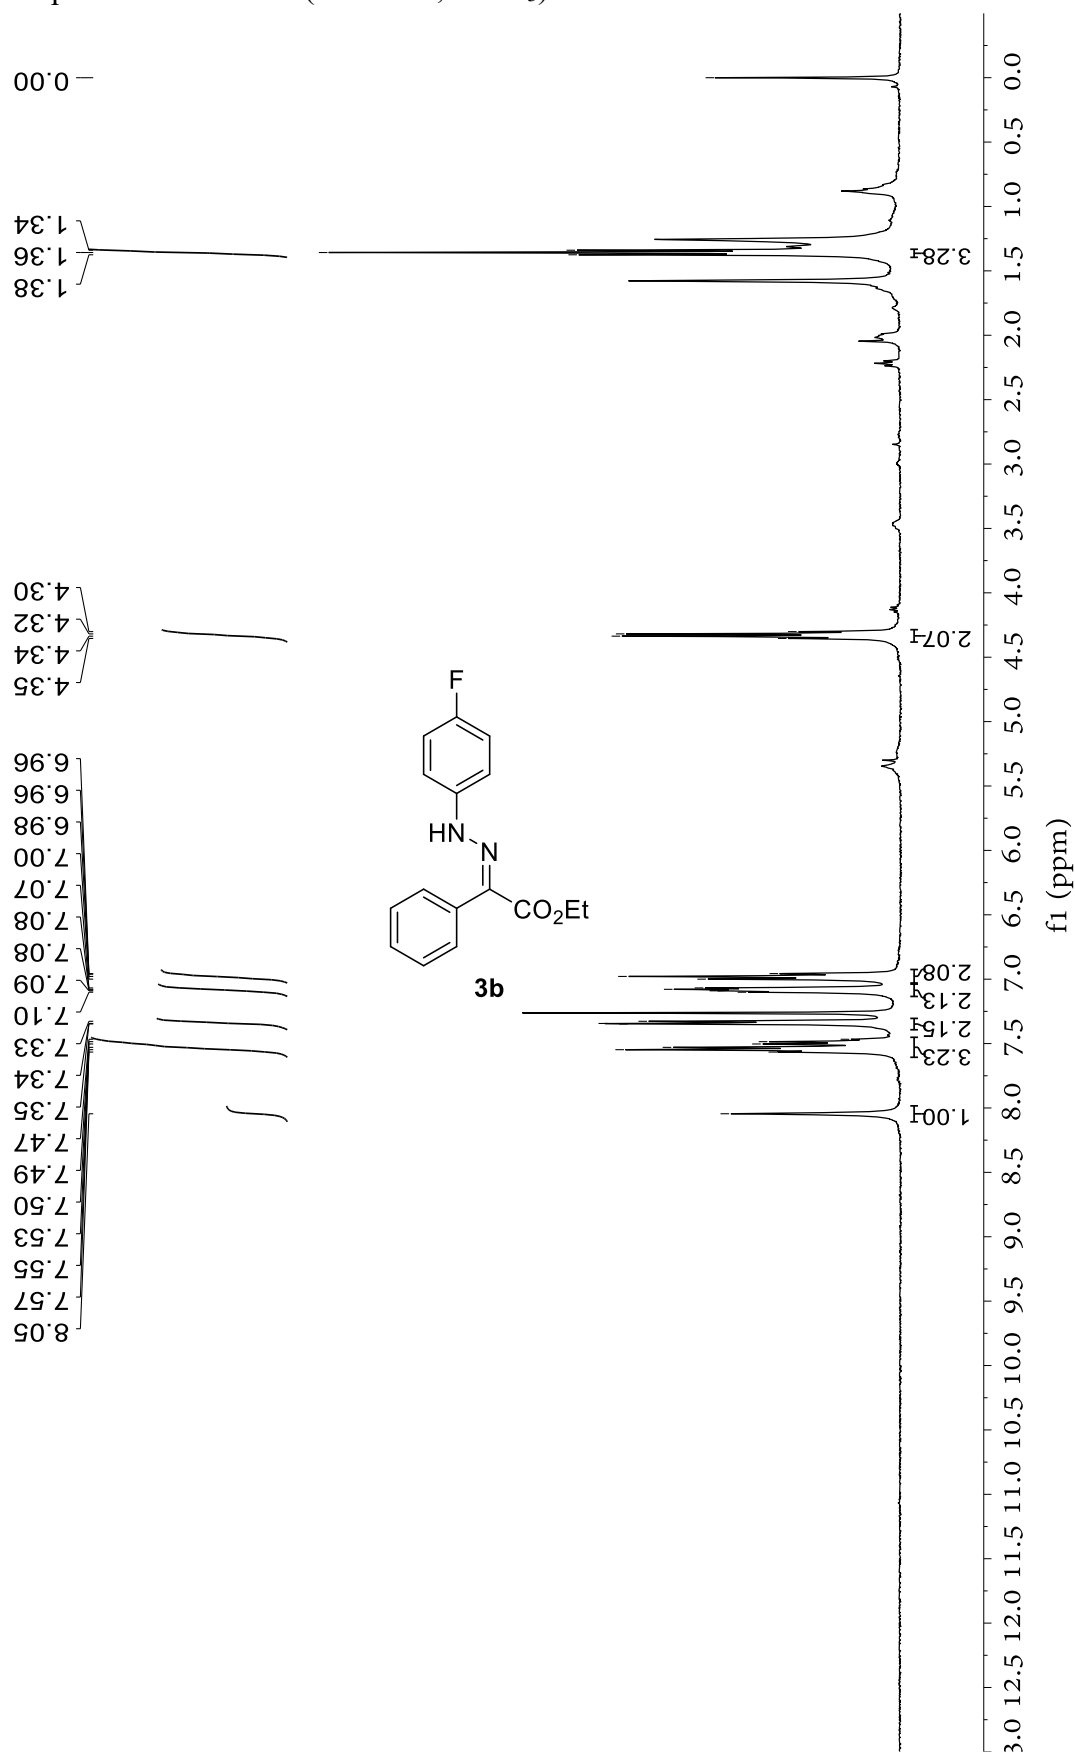

Compound **3b**  $^{13}\text{C}$  NMR (101 MHz,  $\text{CDCl}_3$ )

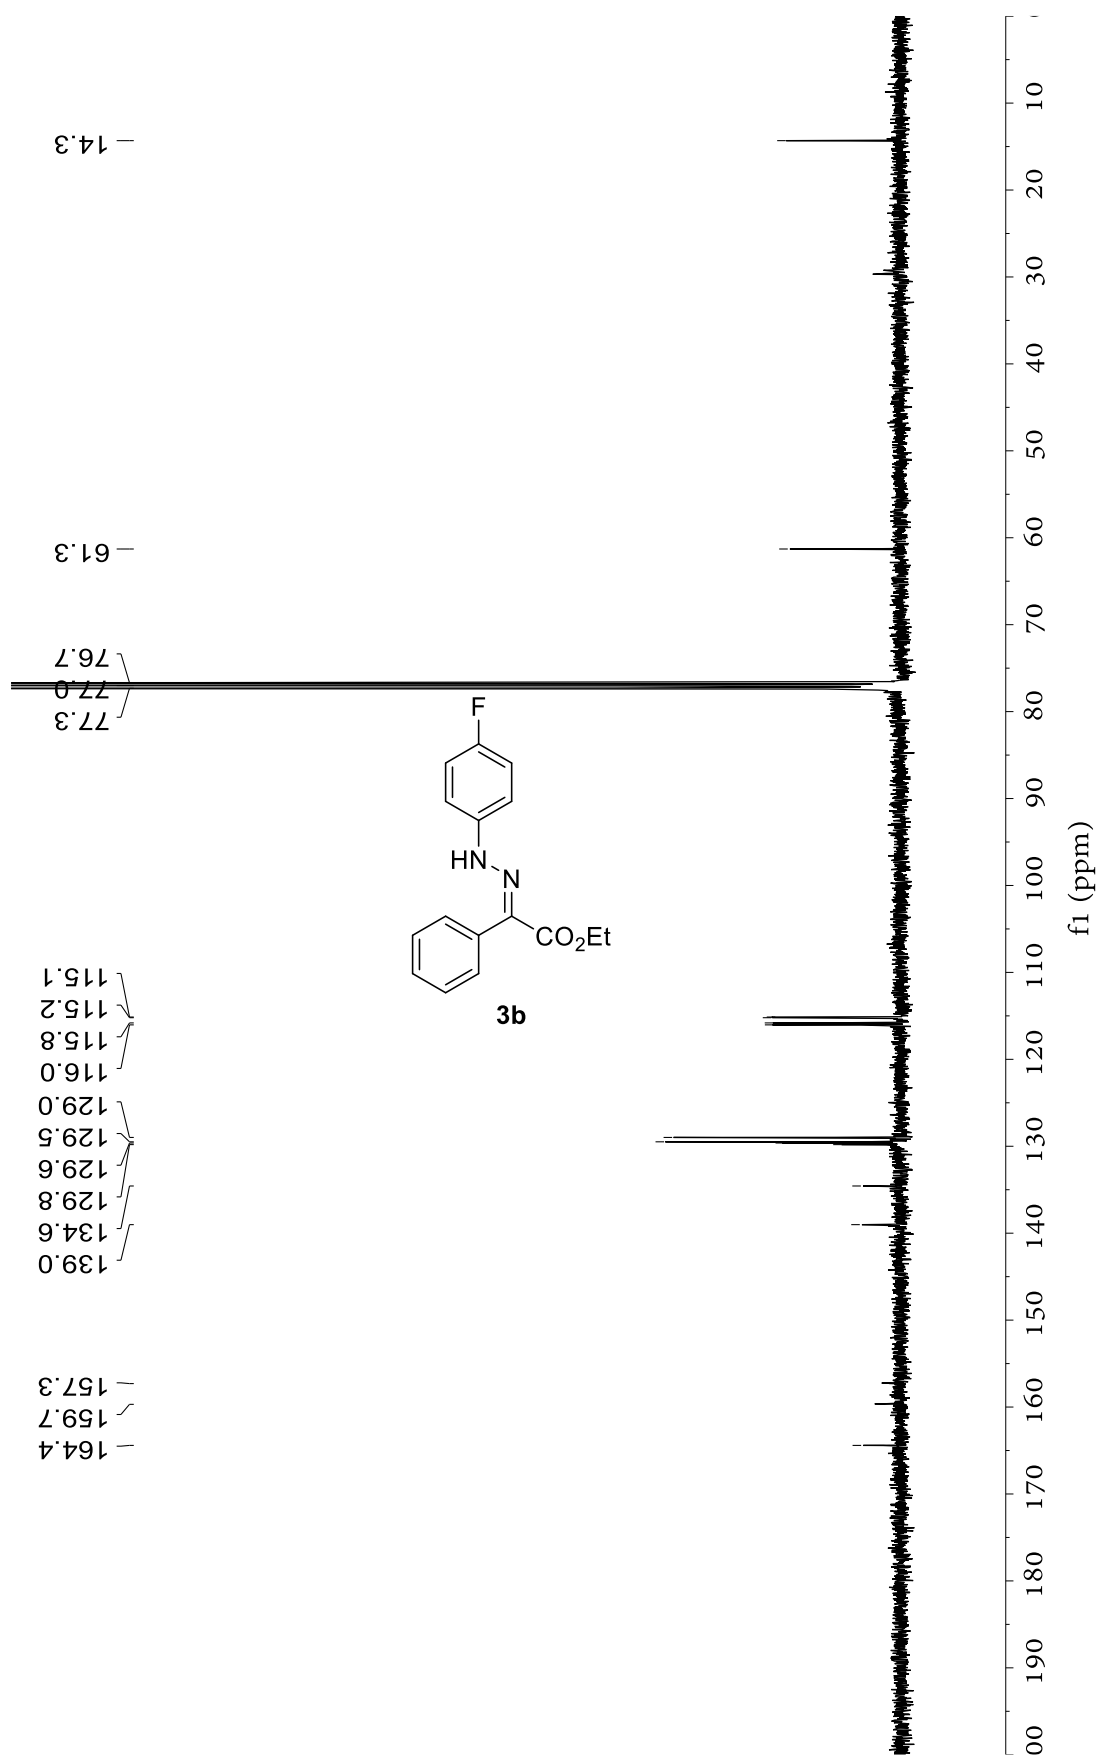

Compound **3b**  $^{19}\text{F}$  NMR (376 MHz,  $\text{CDCl}_3$ )

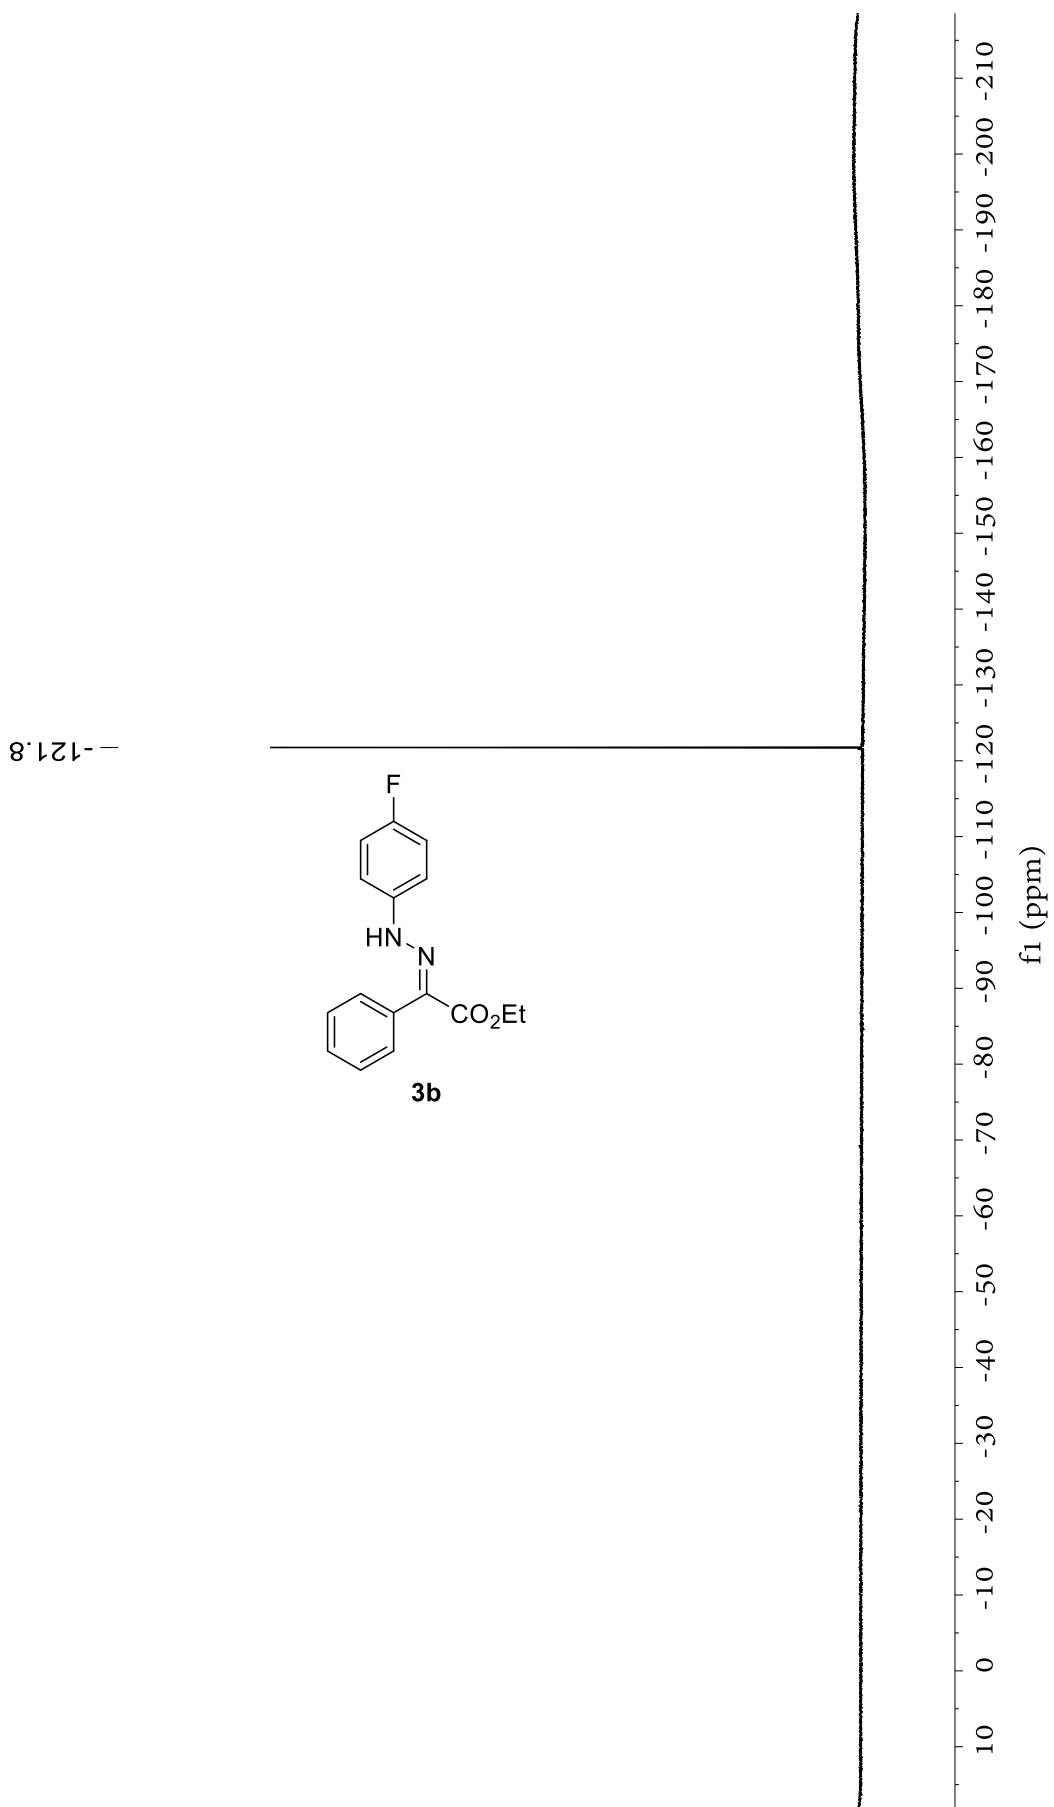

Compound **3e**  $^1\text{H}$  NMR (600 MHz,  $\text{CDCl}_3$ )

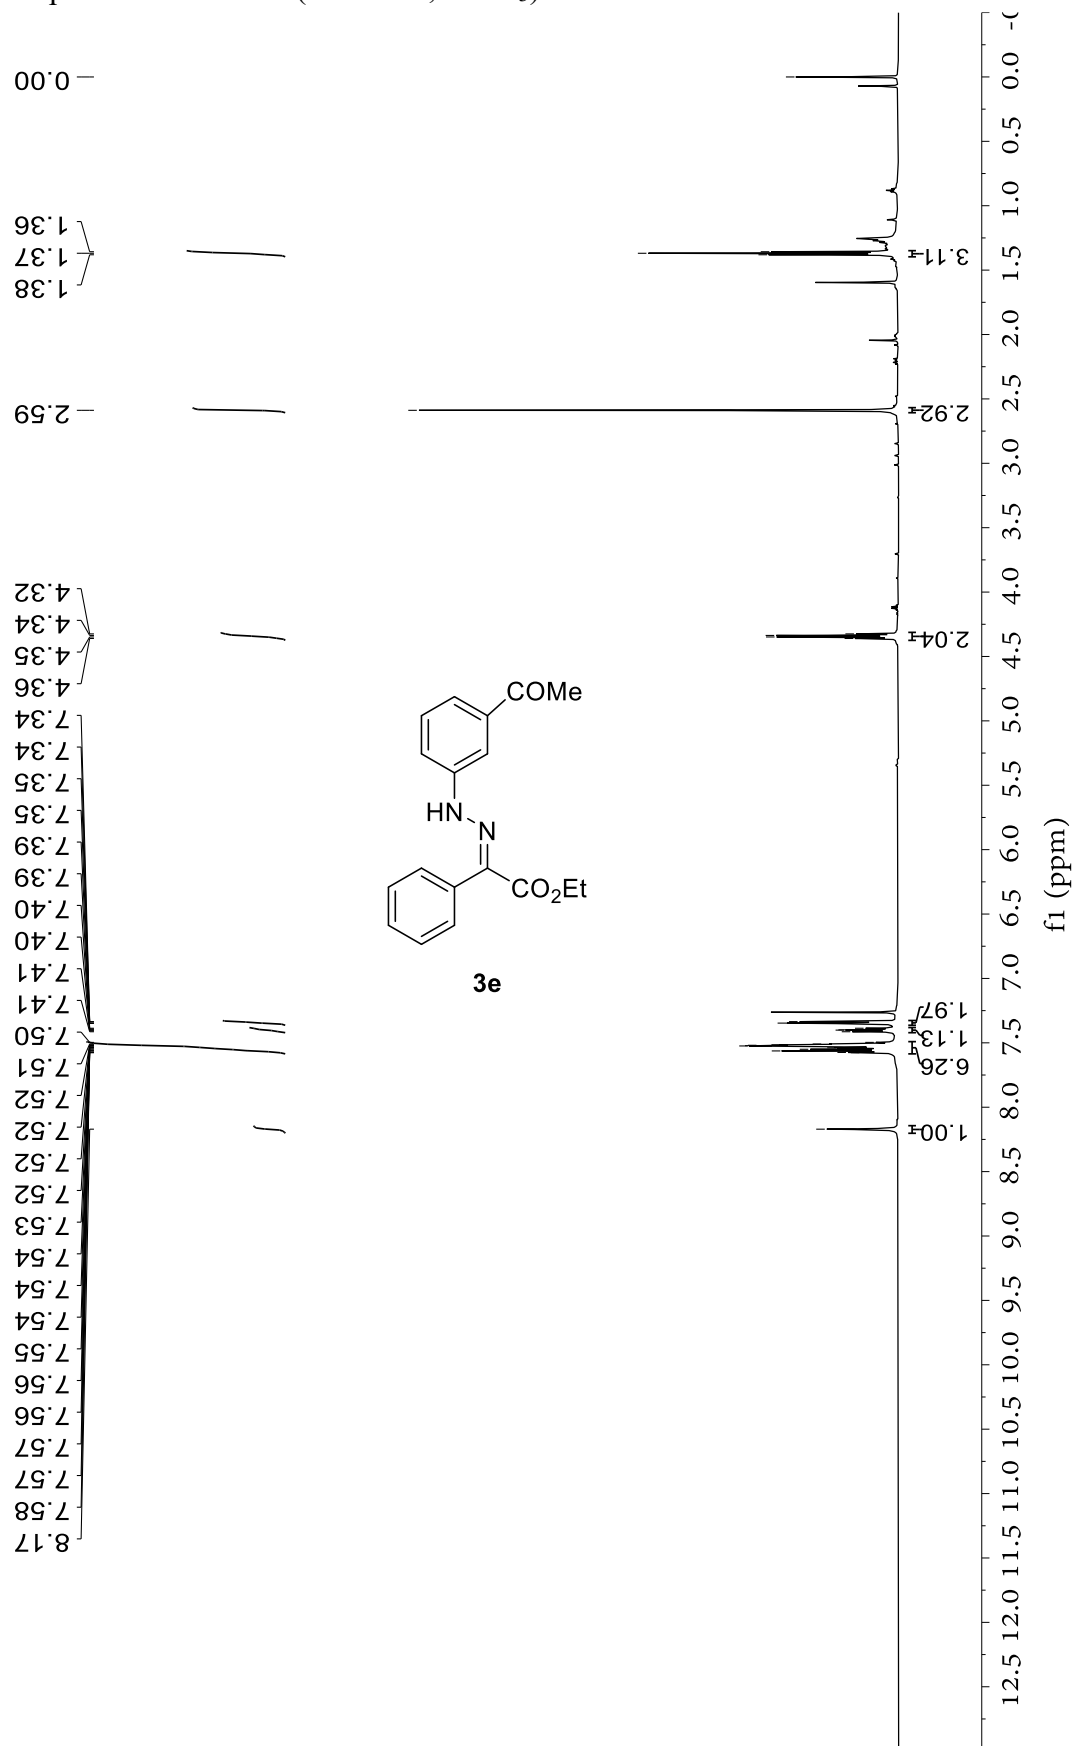



Compound **3e**  $^{13}\text{C}$  NMR (151 MHz,  $\text{CDCl}_3$ )

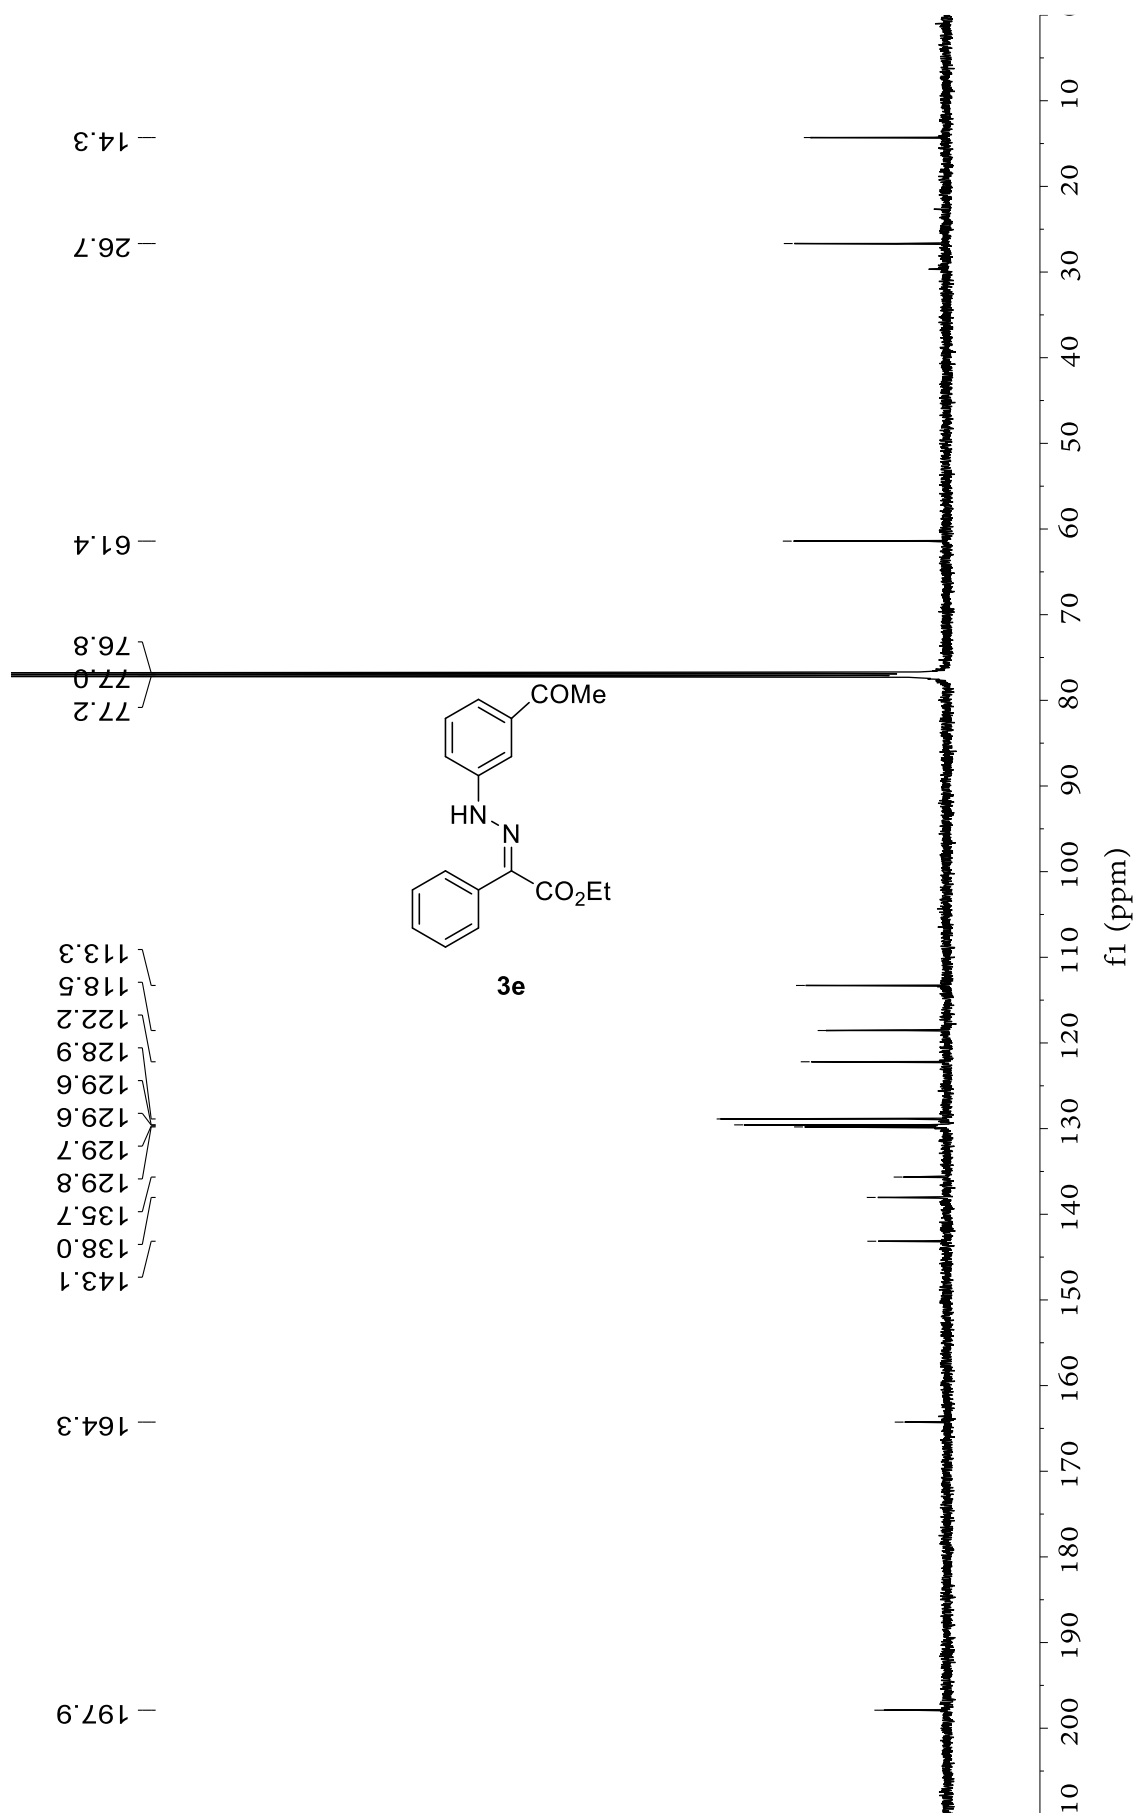

Compound **3f**  $^1\text{H}$  NMR (600 MHz,  $\text{CDCl}_3$ )

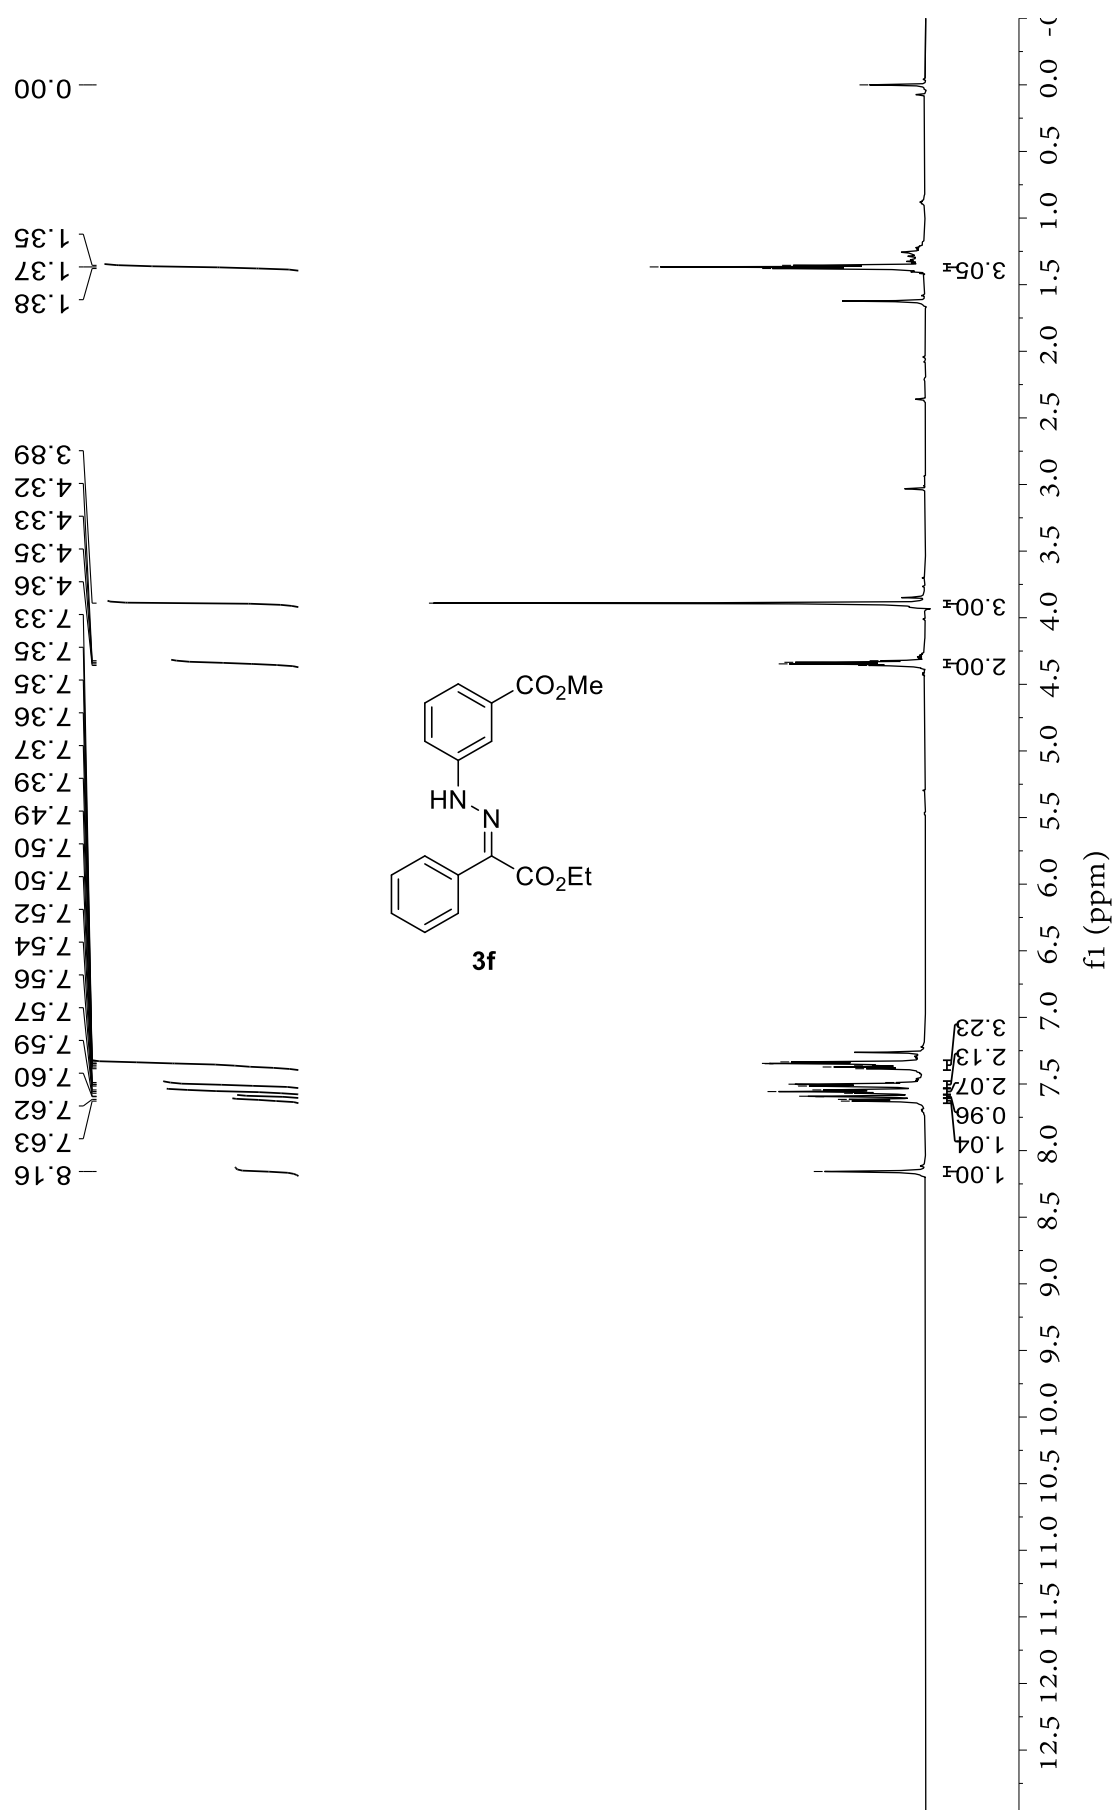

Compound **3f**  $^{13}\text{C}$  NMR (151 MHz,  $\text{CDCl}_3$ )

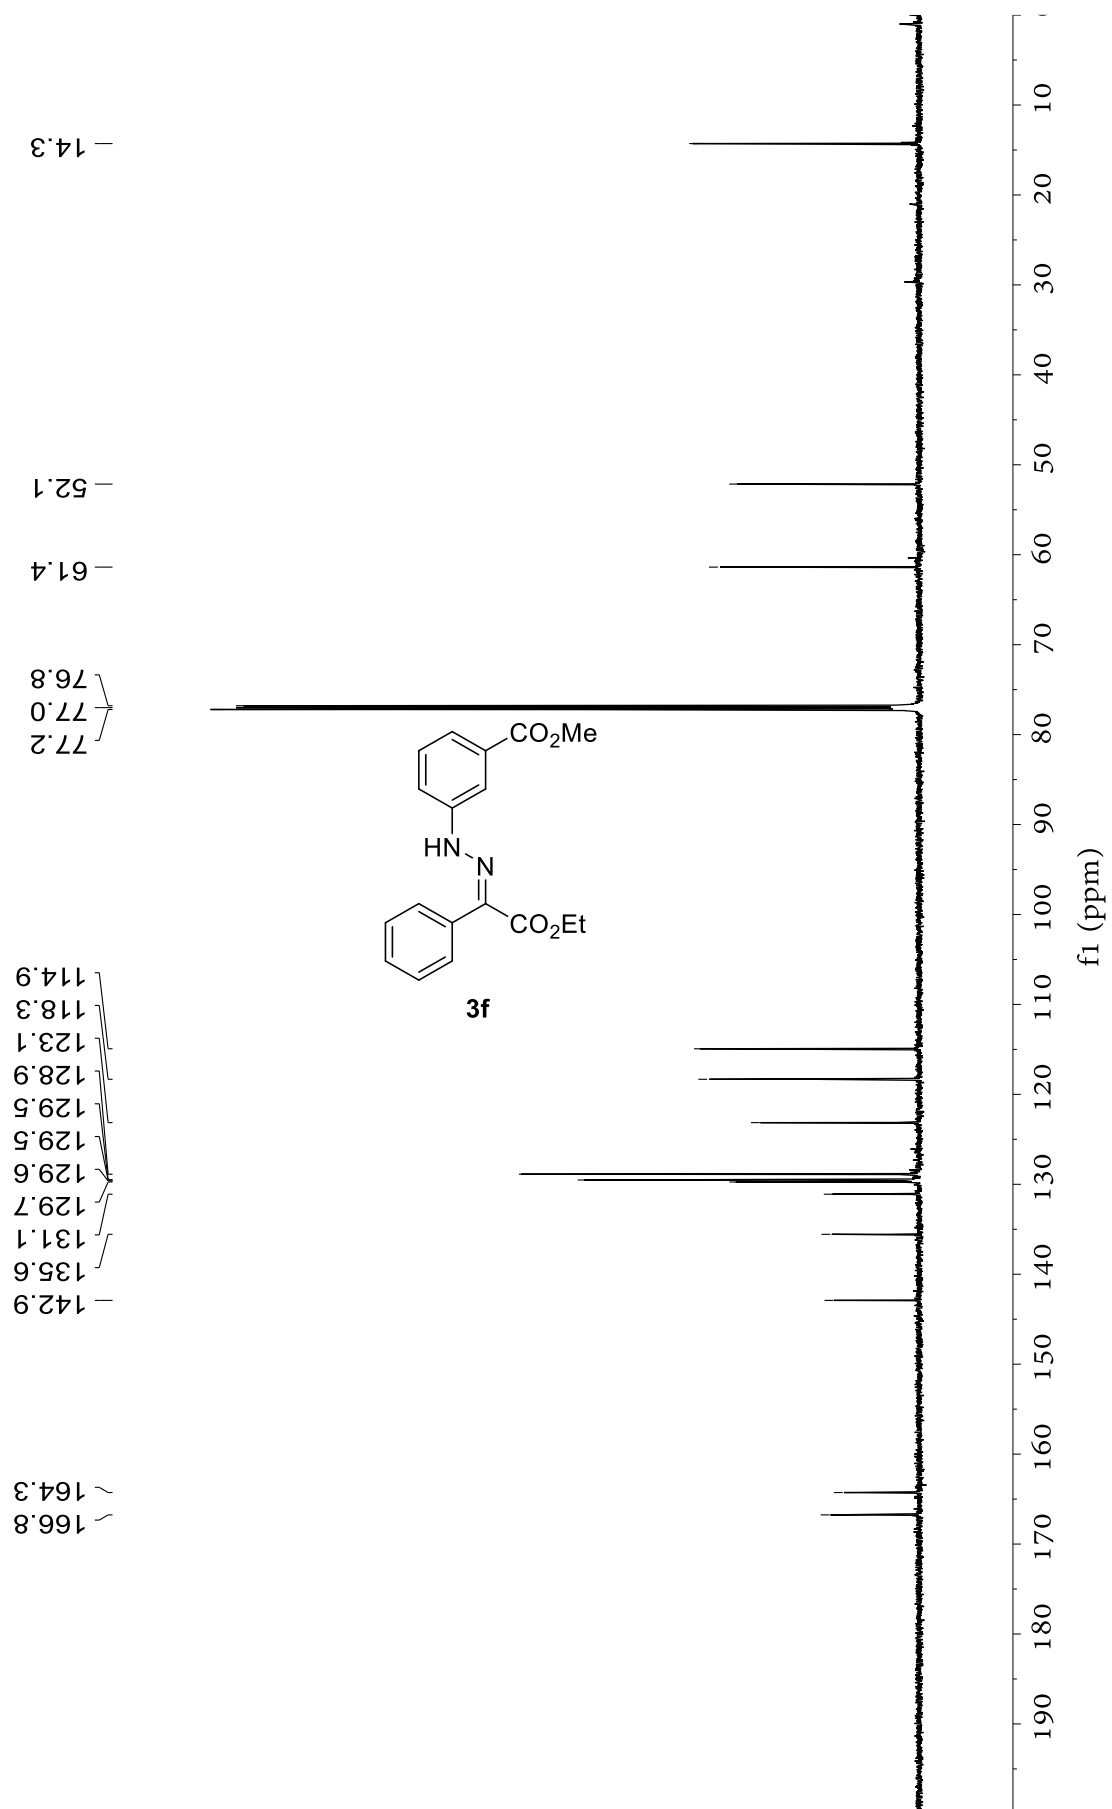

Compound **3i**  $^1\text{H}$  NMR (600 MHz,  $\text{CDCl}_3$ )

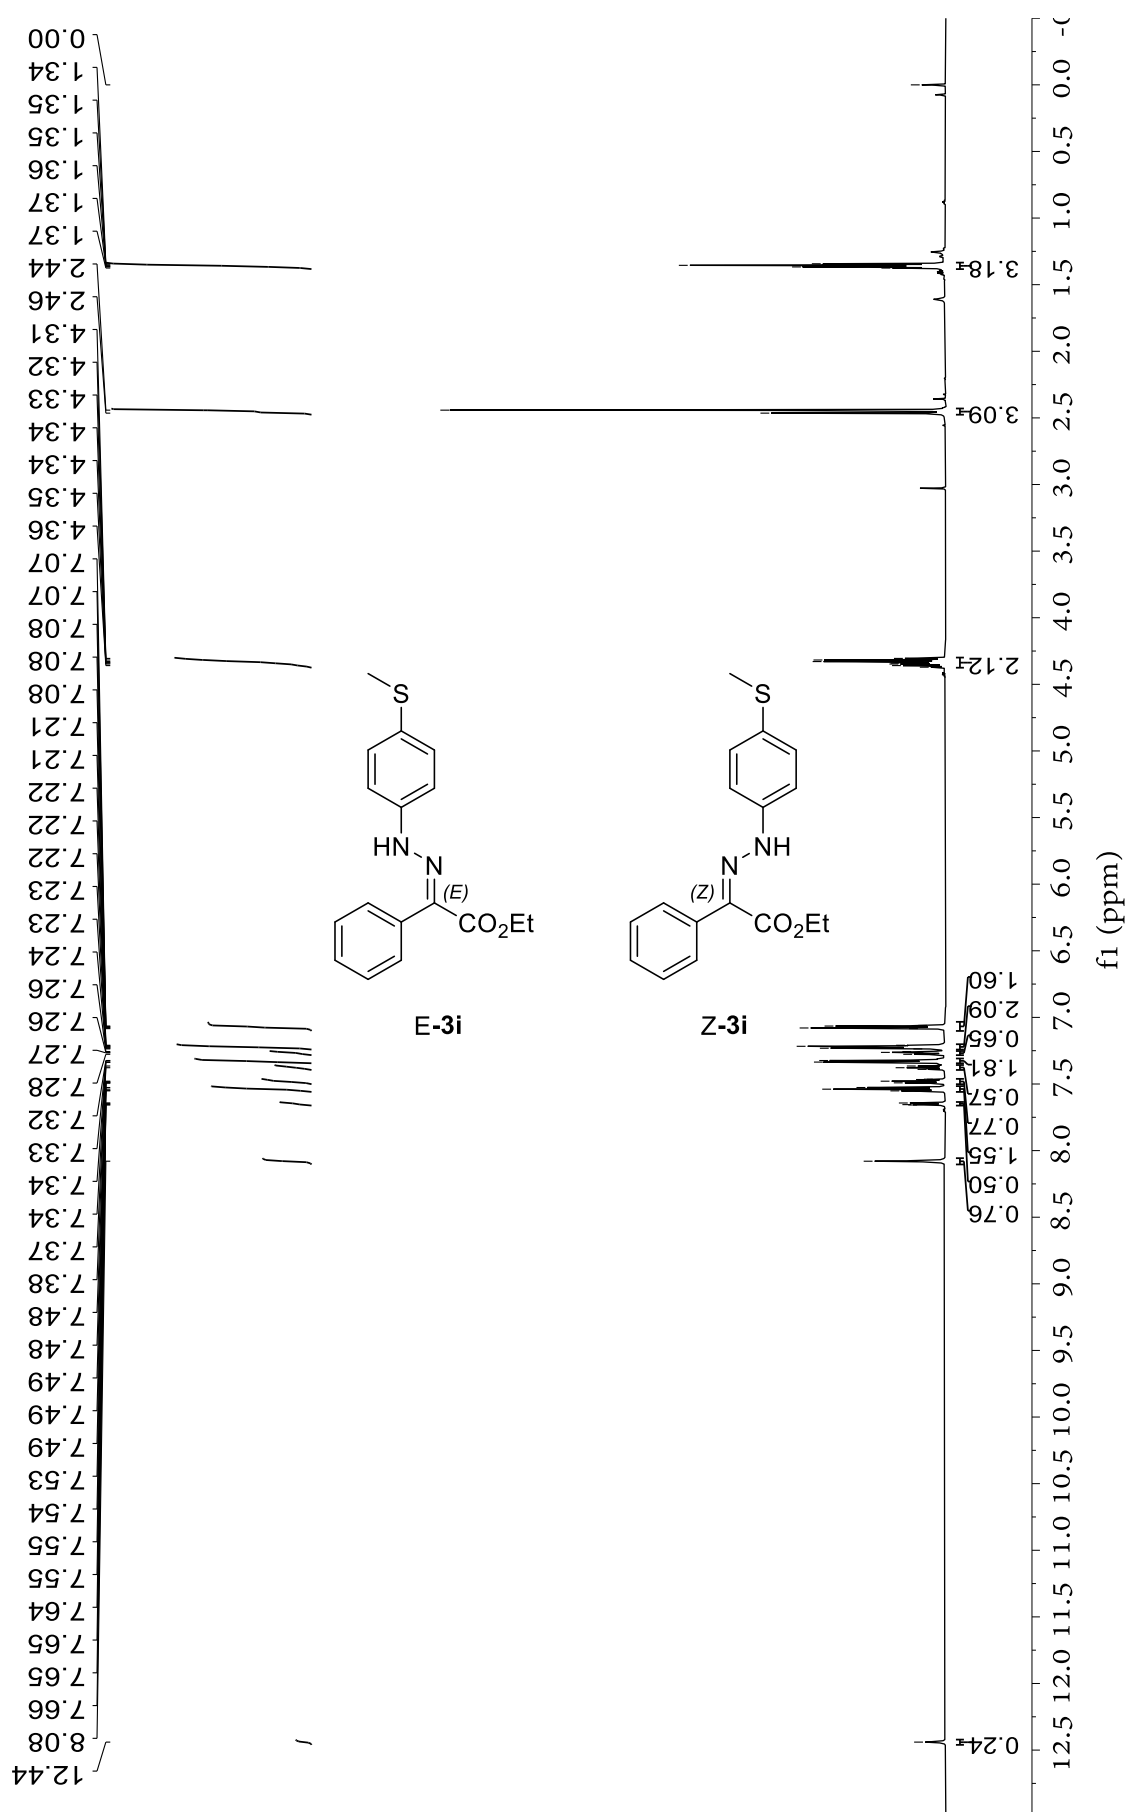

Compound **3i**  $^{13}\text{C}$  NMR (151 MHz,  $\text{CDCl}_3$ )

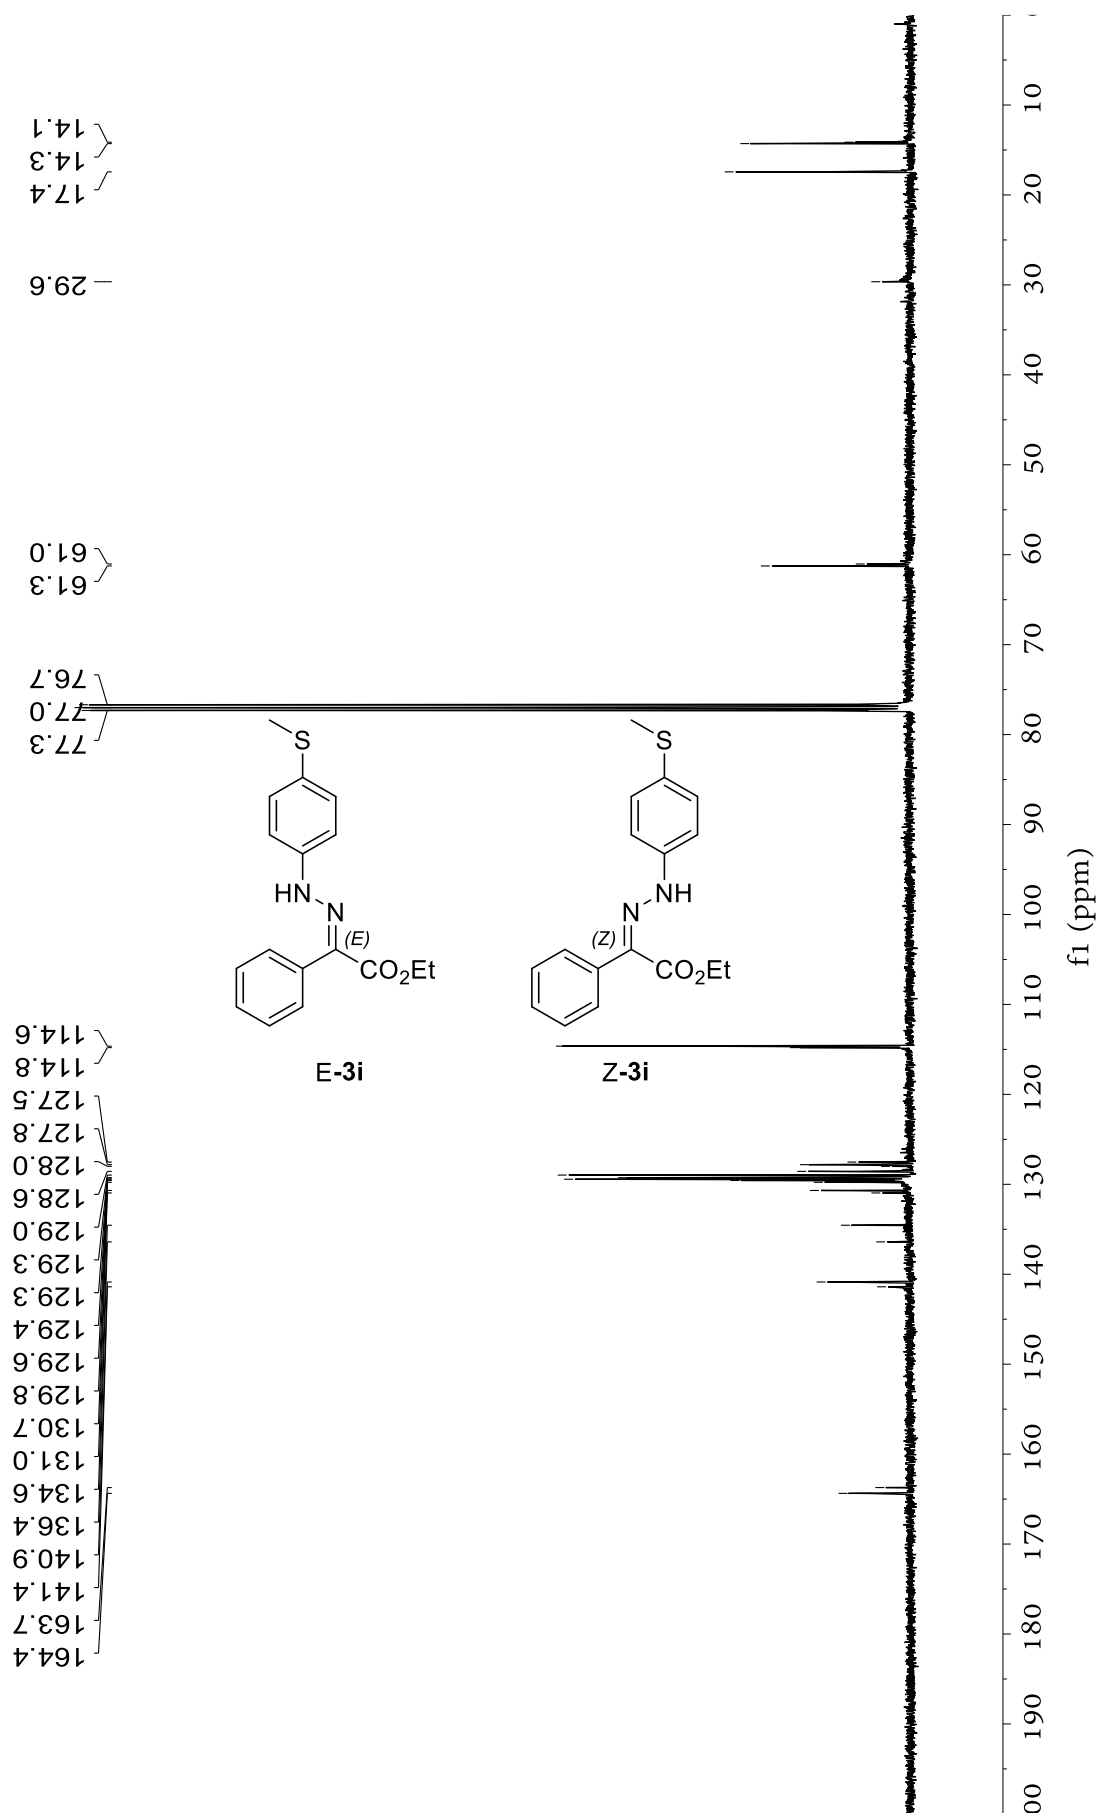

Compound **3j**  $^1\text{H}$  NMR (400 MHz,  $\text{CDCl}_3$ )

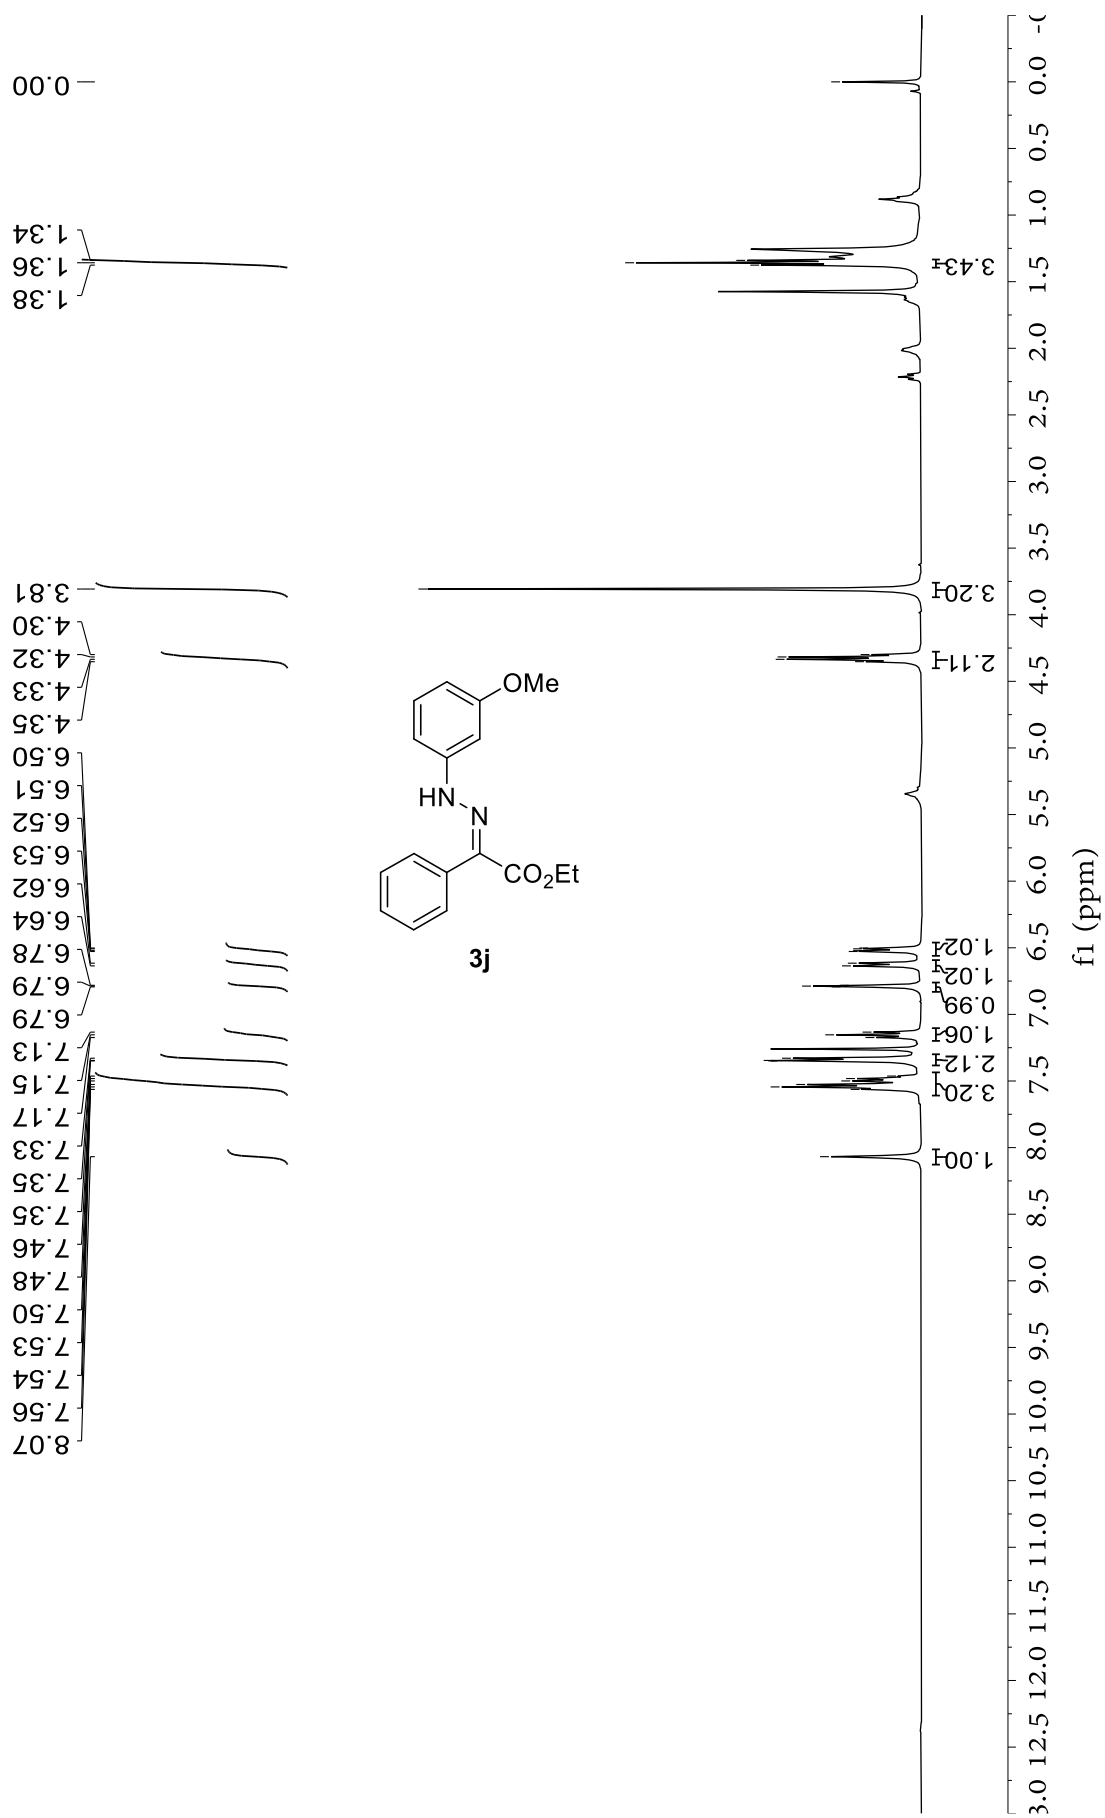

Compound **3j**  $^{13}\text{C}$  NMR (101 MHz,  $\text{CDCl}_3$ )

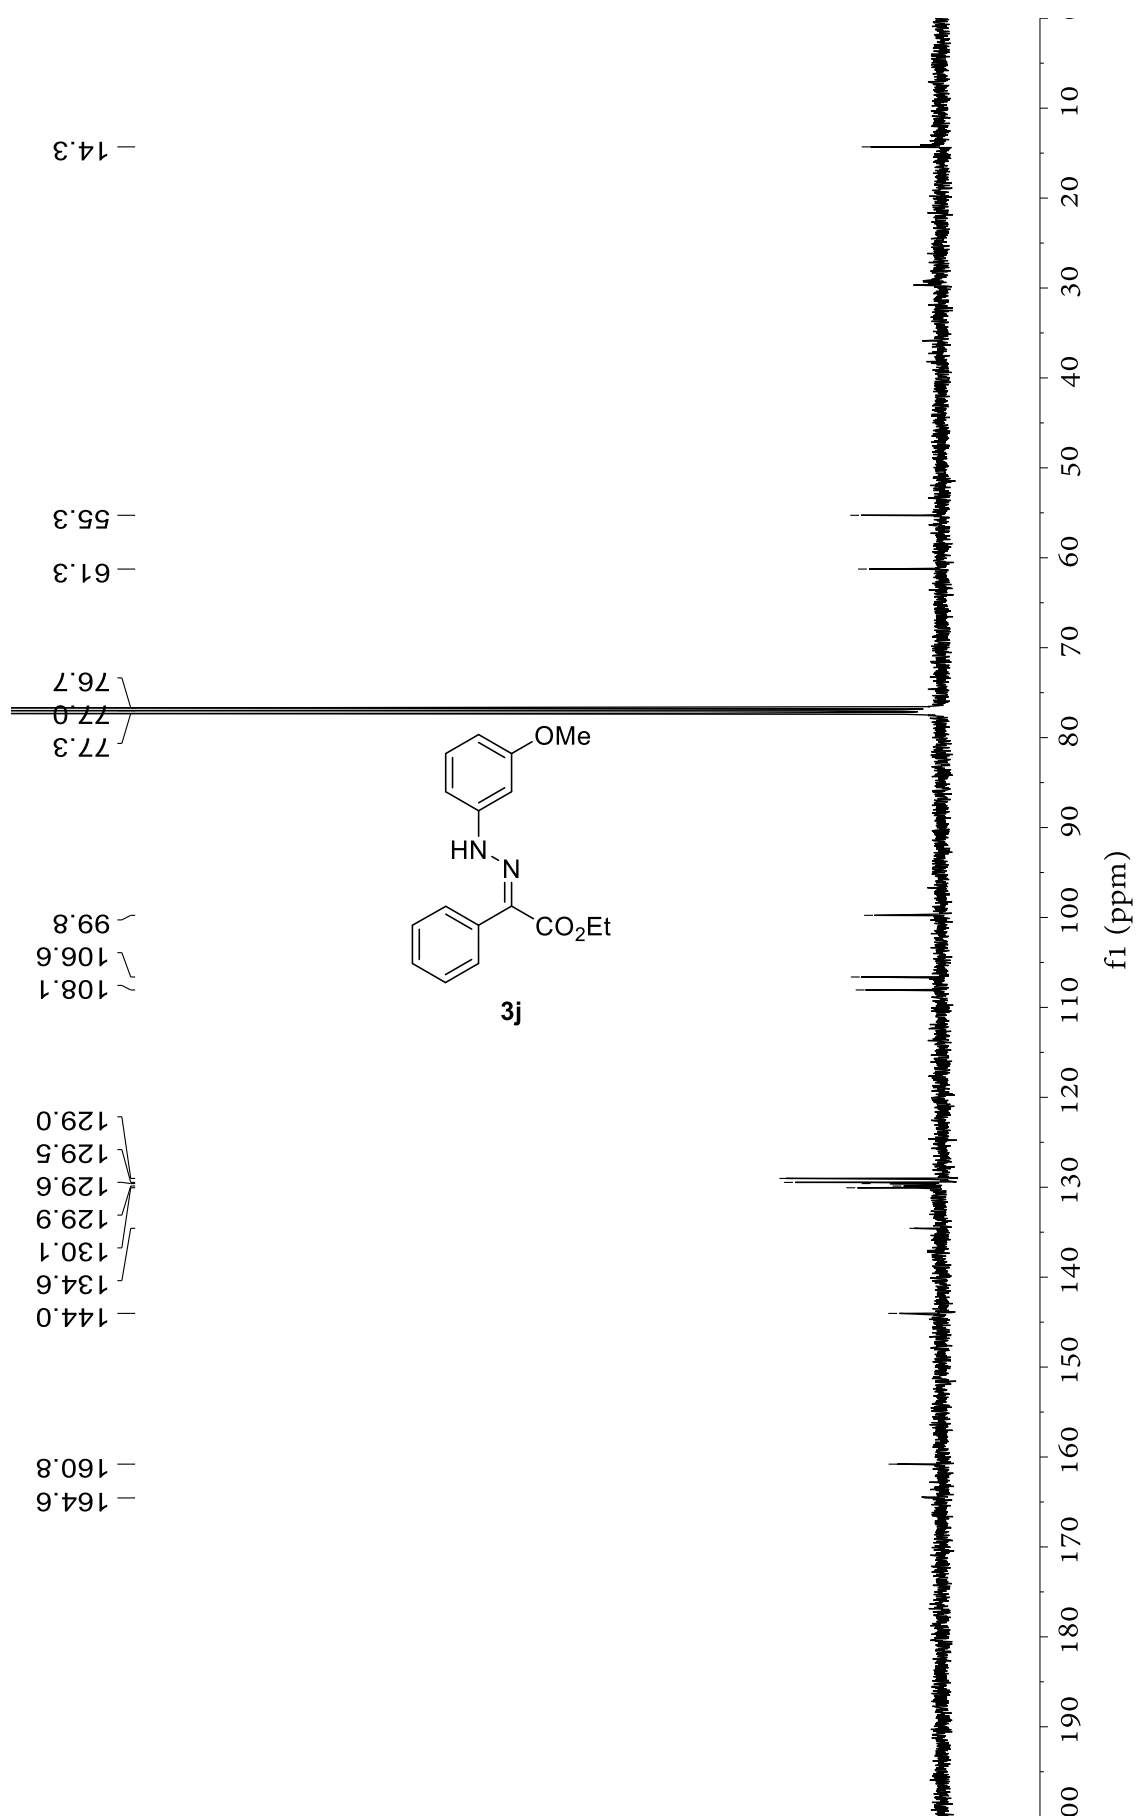

Compound **3k**  $^1\text{H}$  NMR (400 MHz,  $\text{CDCl}_3$ )

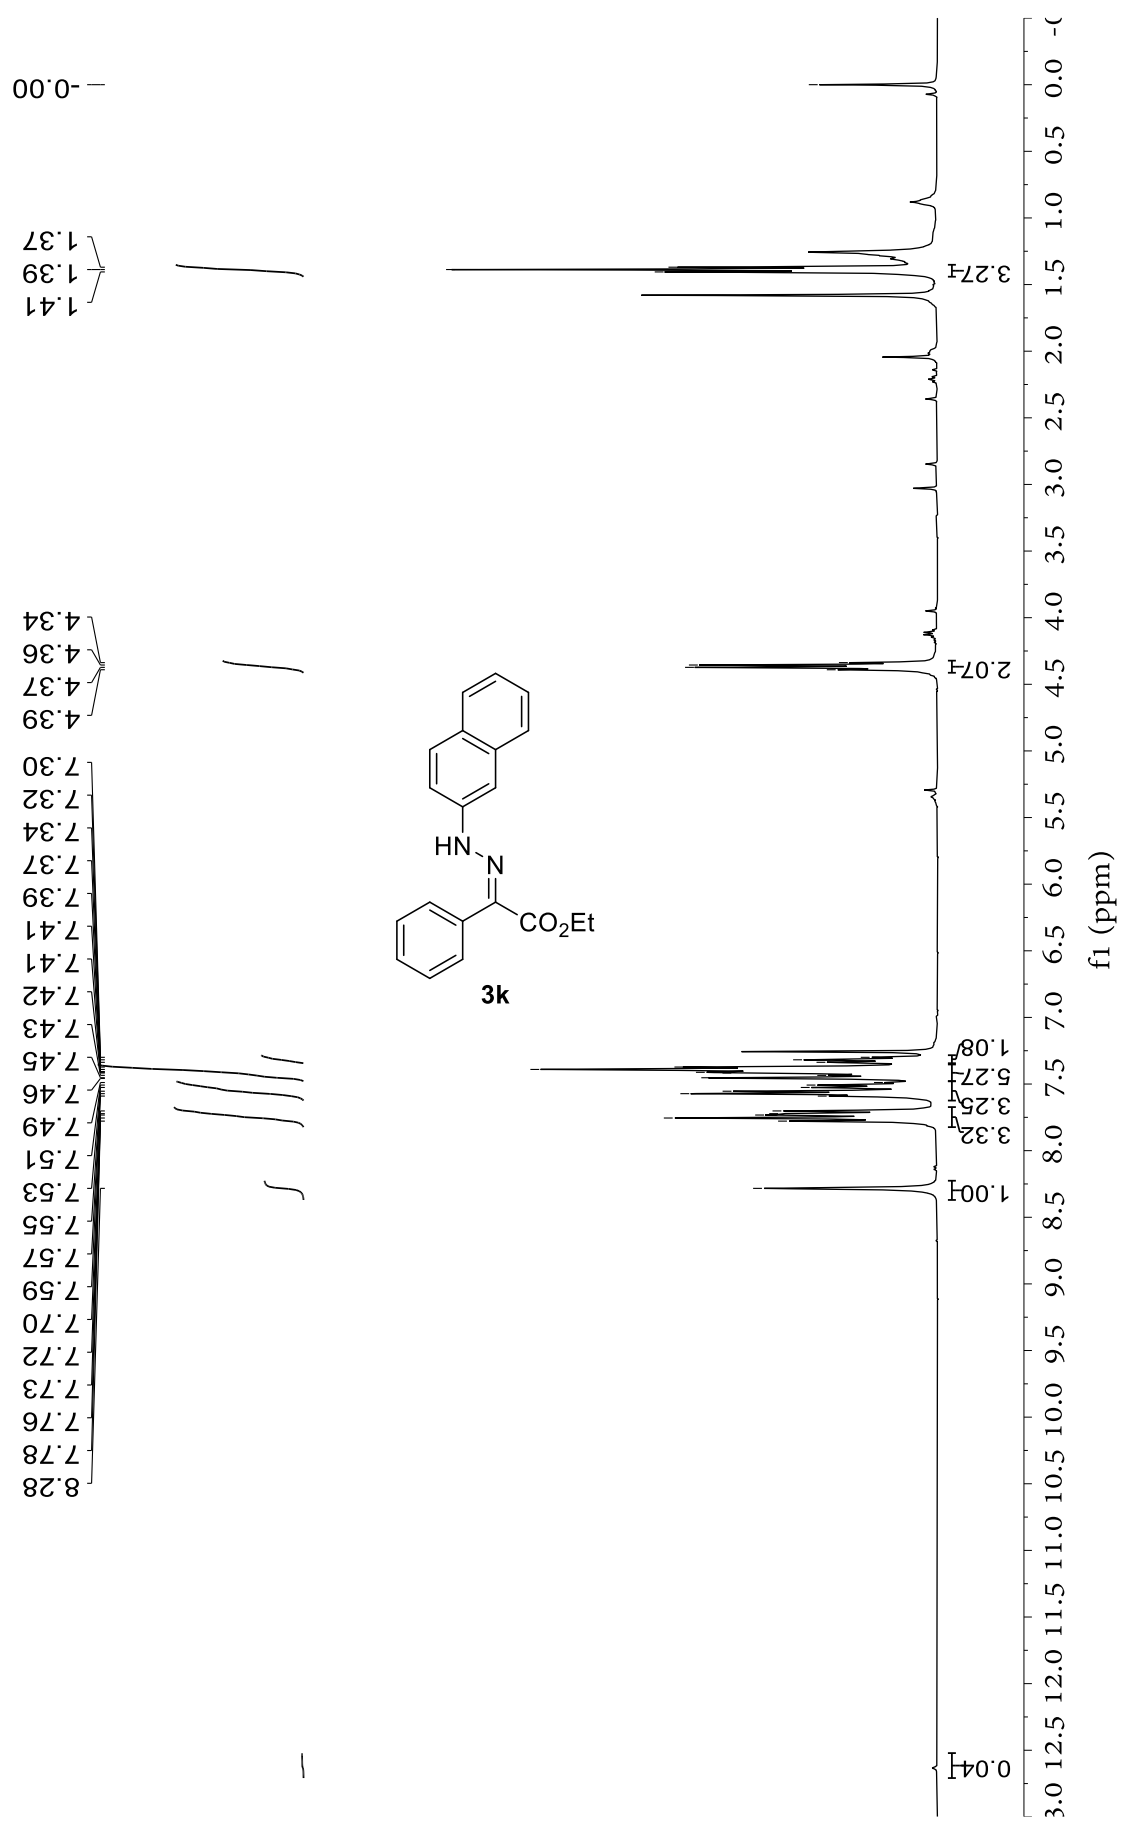



Compound **3k**  $^{13}\text{C}$  NMR (101 MHz,  $\text{CDCl}_3$ )

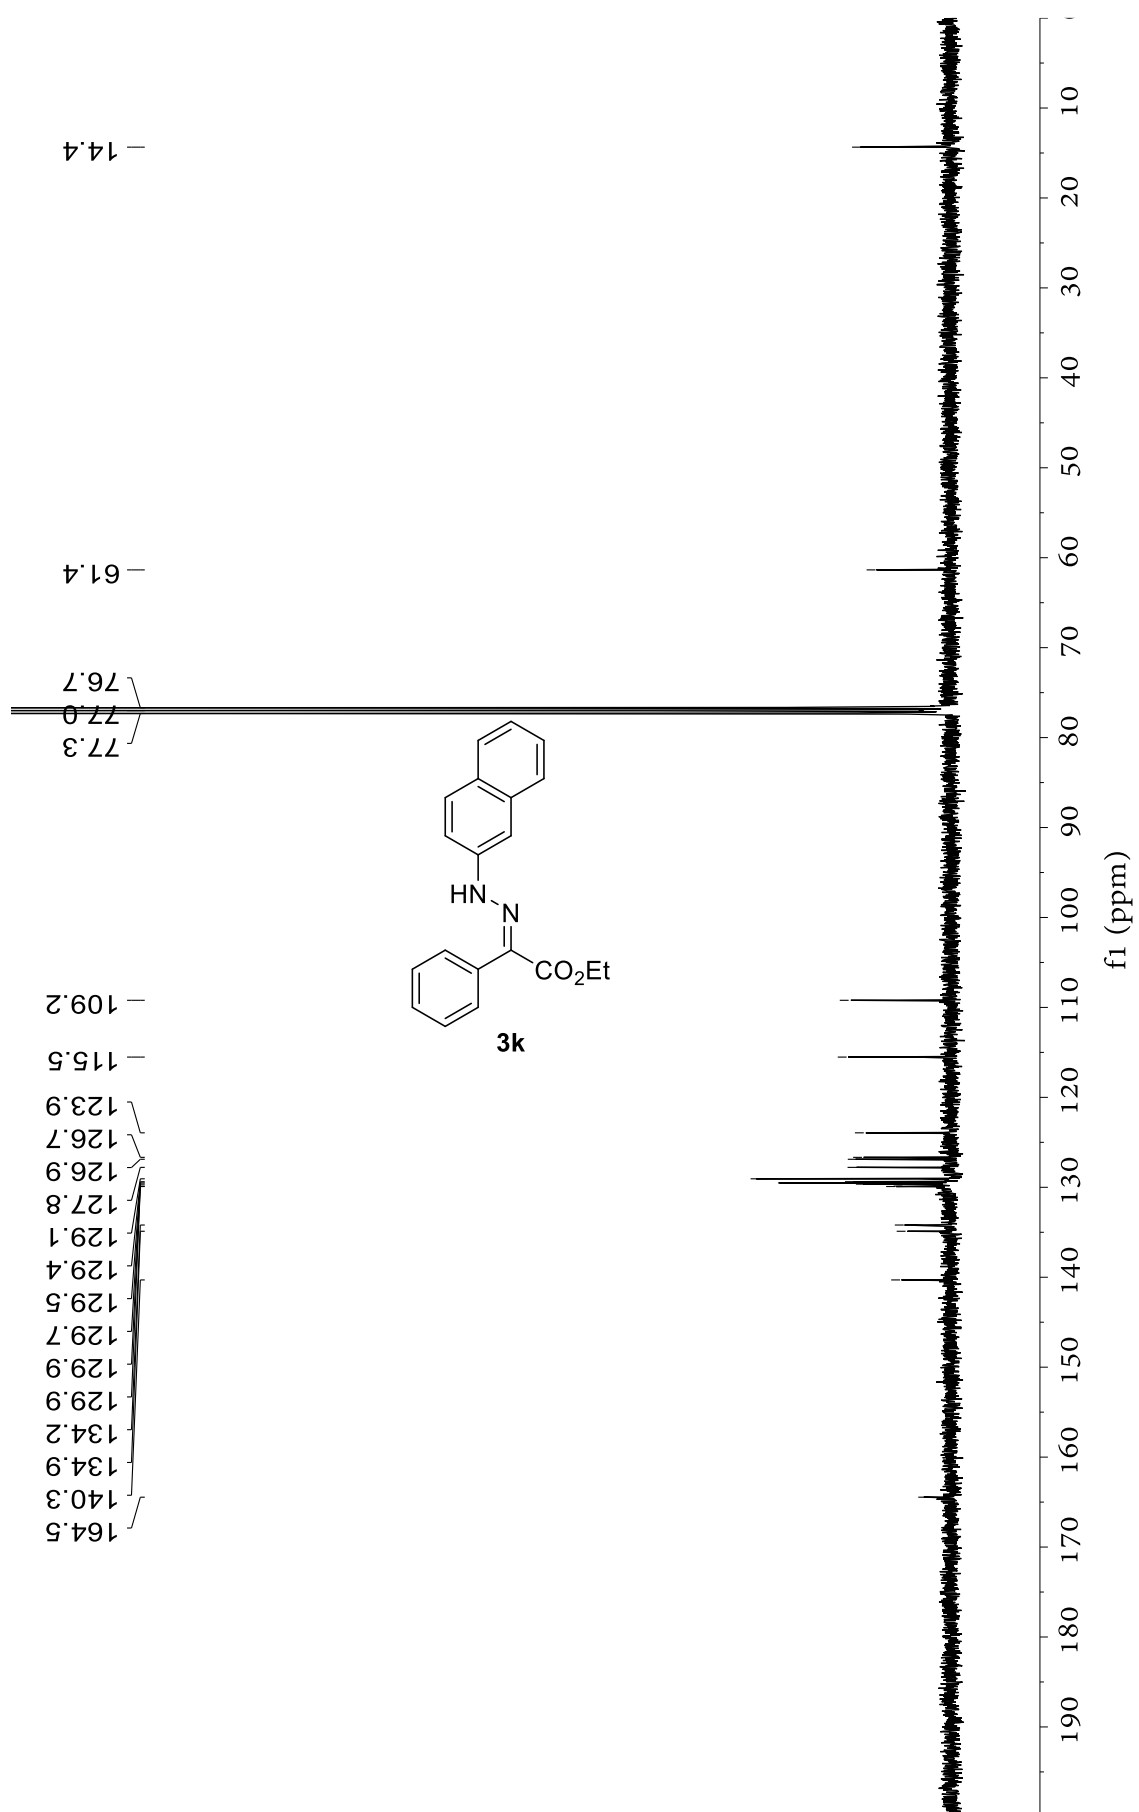

Compound **31**  $^1\text{H}$  NMR (600 MHz,  $\text{CDCl}_3$ )

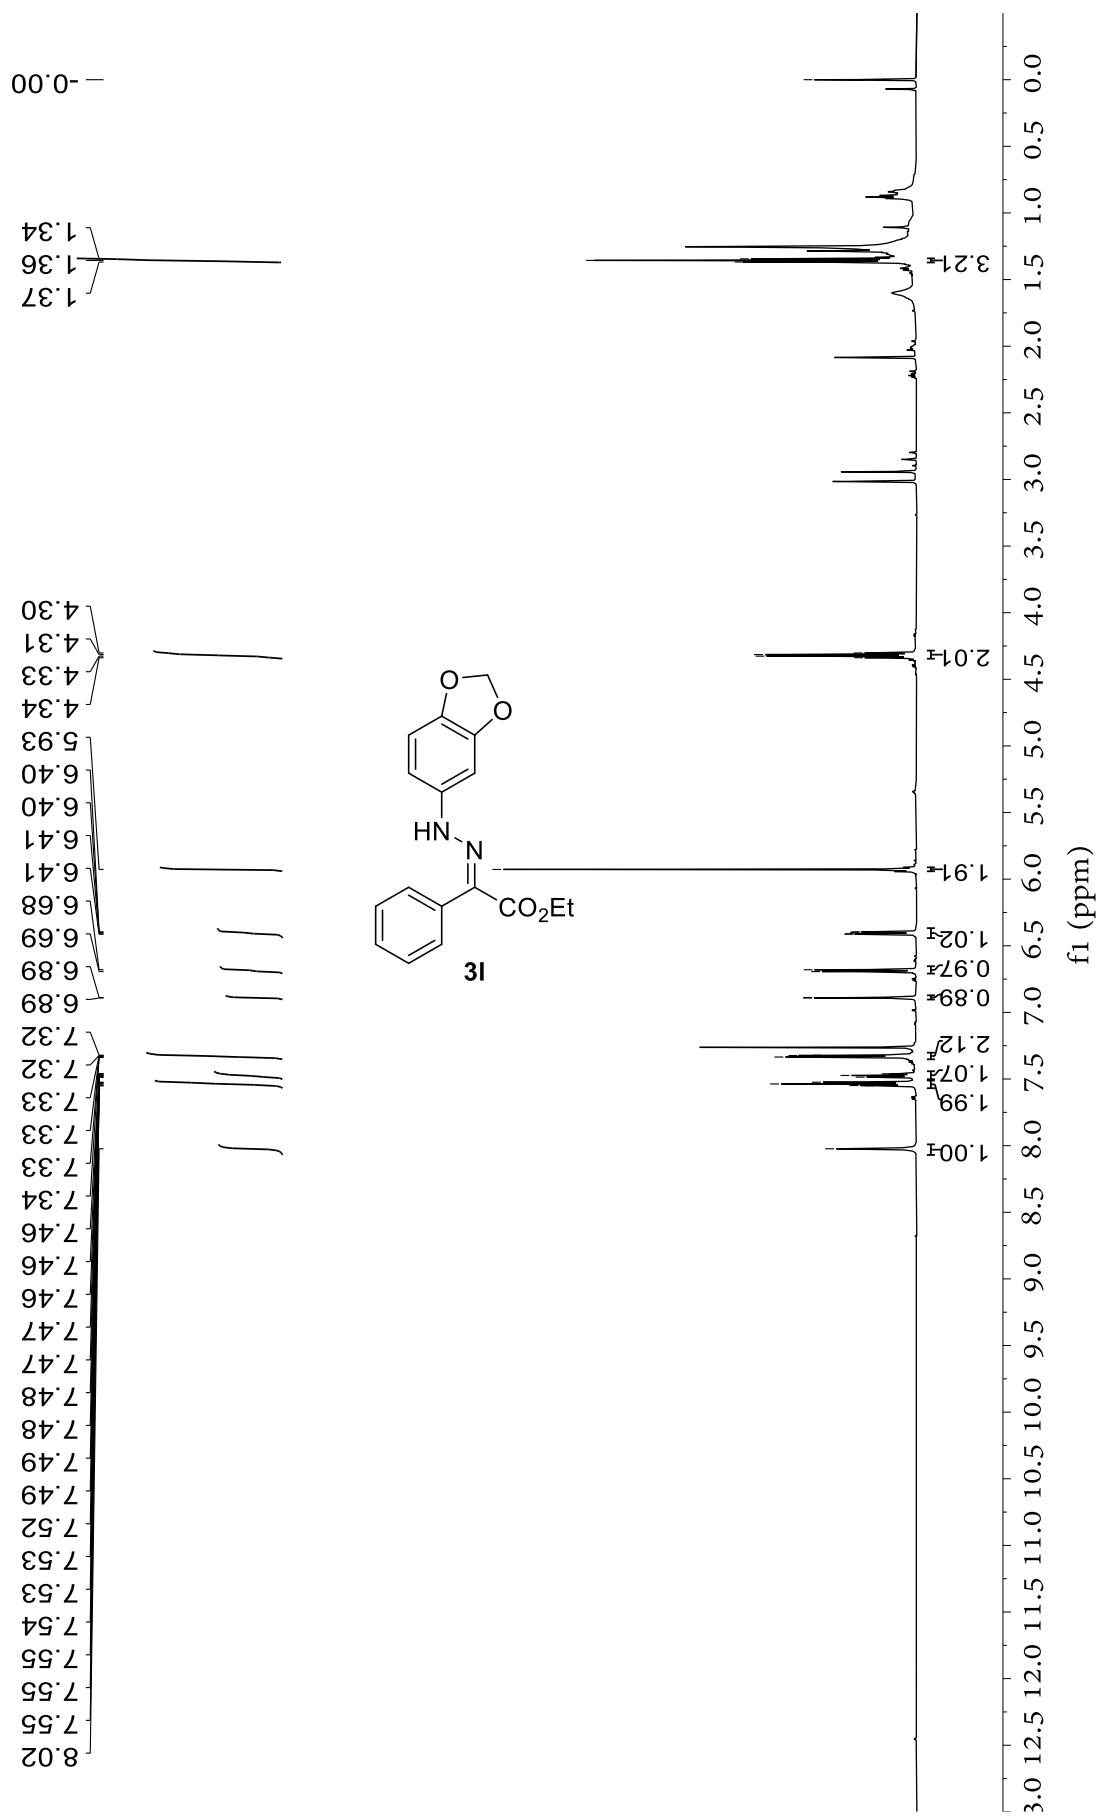

Compound **31**  $^{13}\text{C}$  NMR (151 MHz,  $\text{CDCl}_3$ )

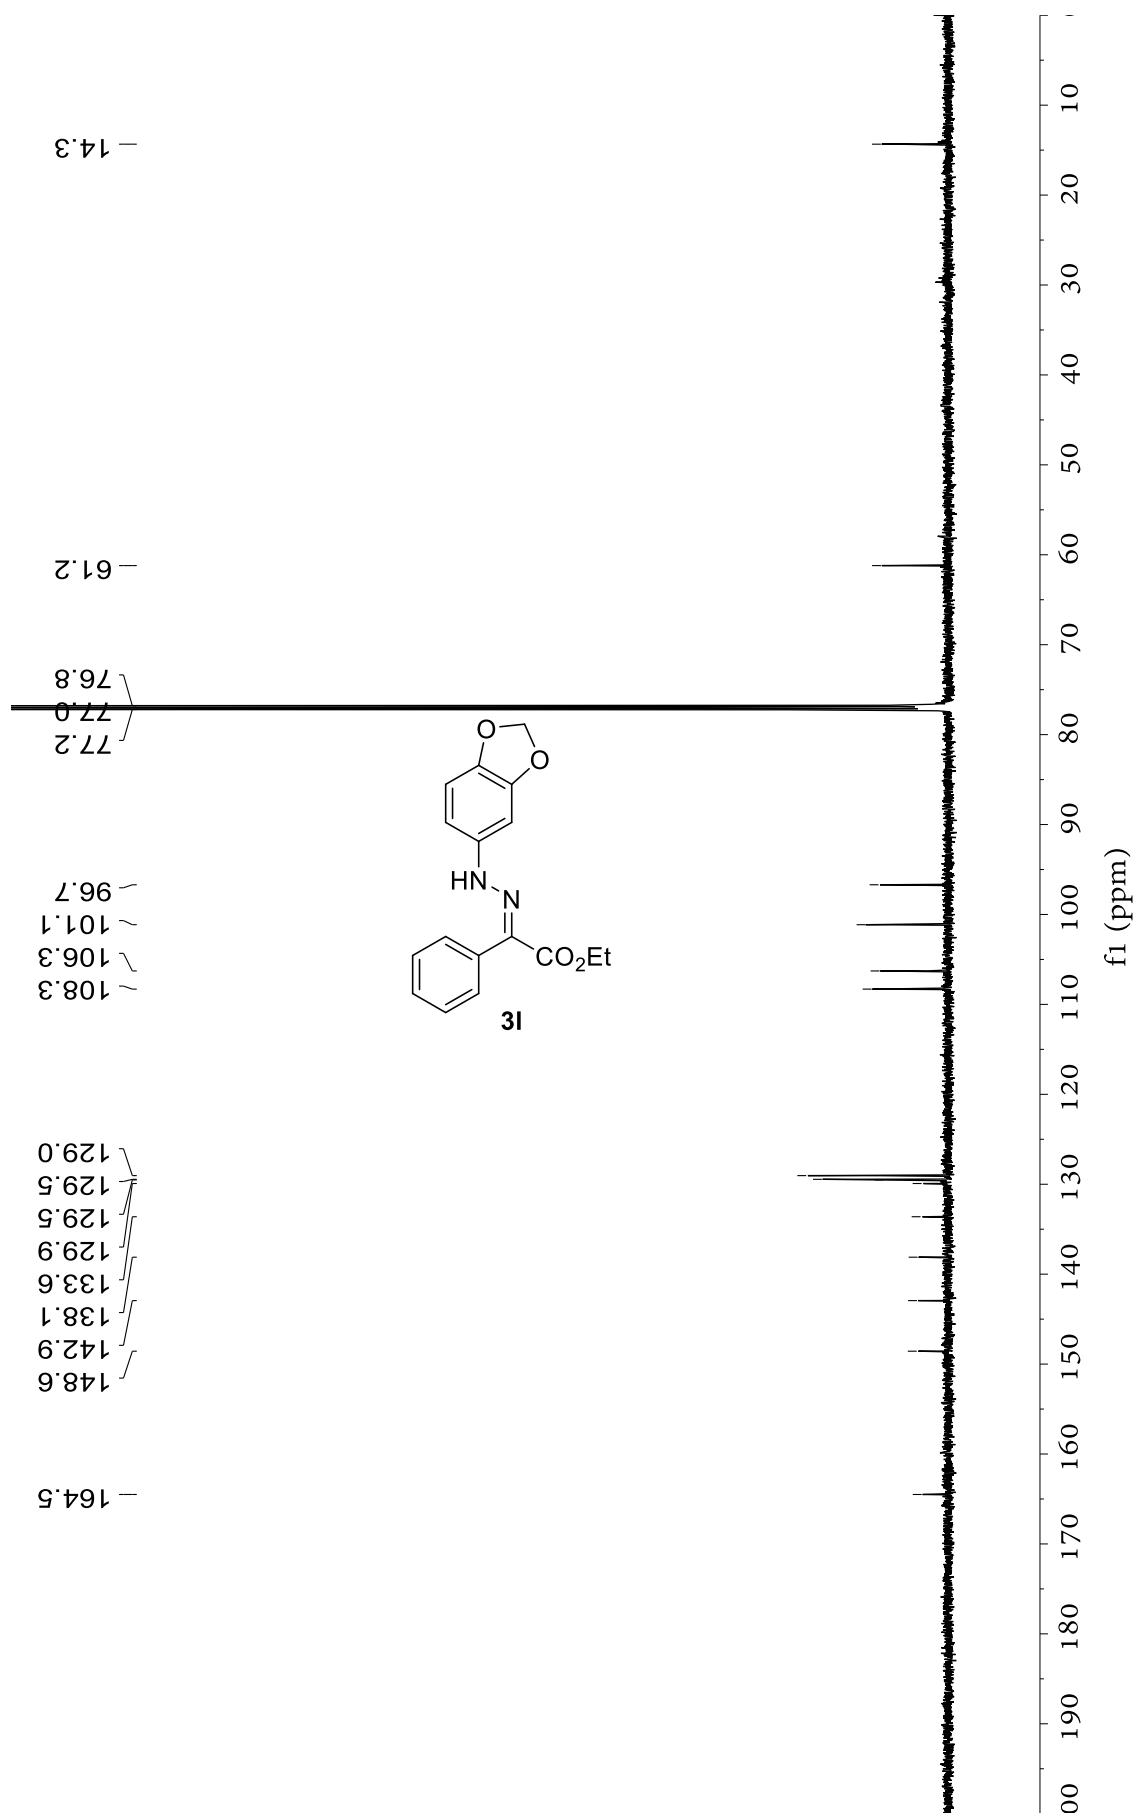

Compound **3m**  $^1\text{H}$  NMR (400 MHz,  $\text{CDCl}_3$ )

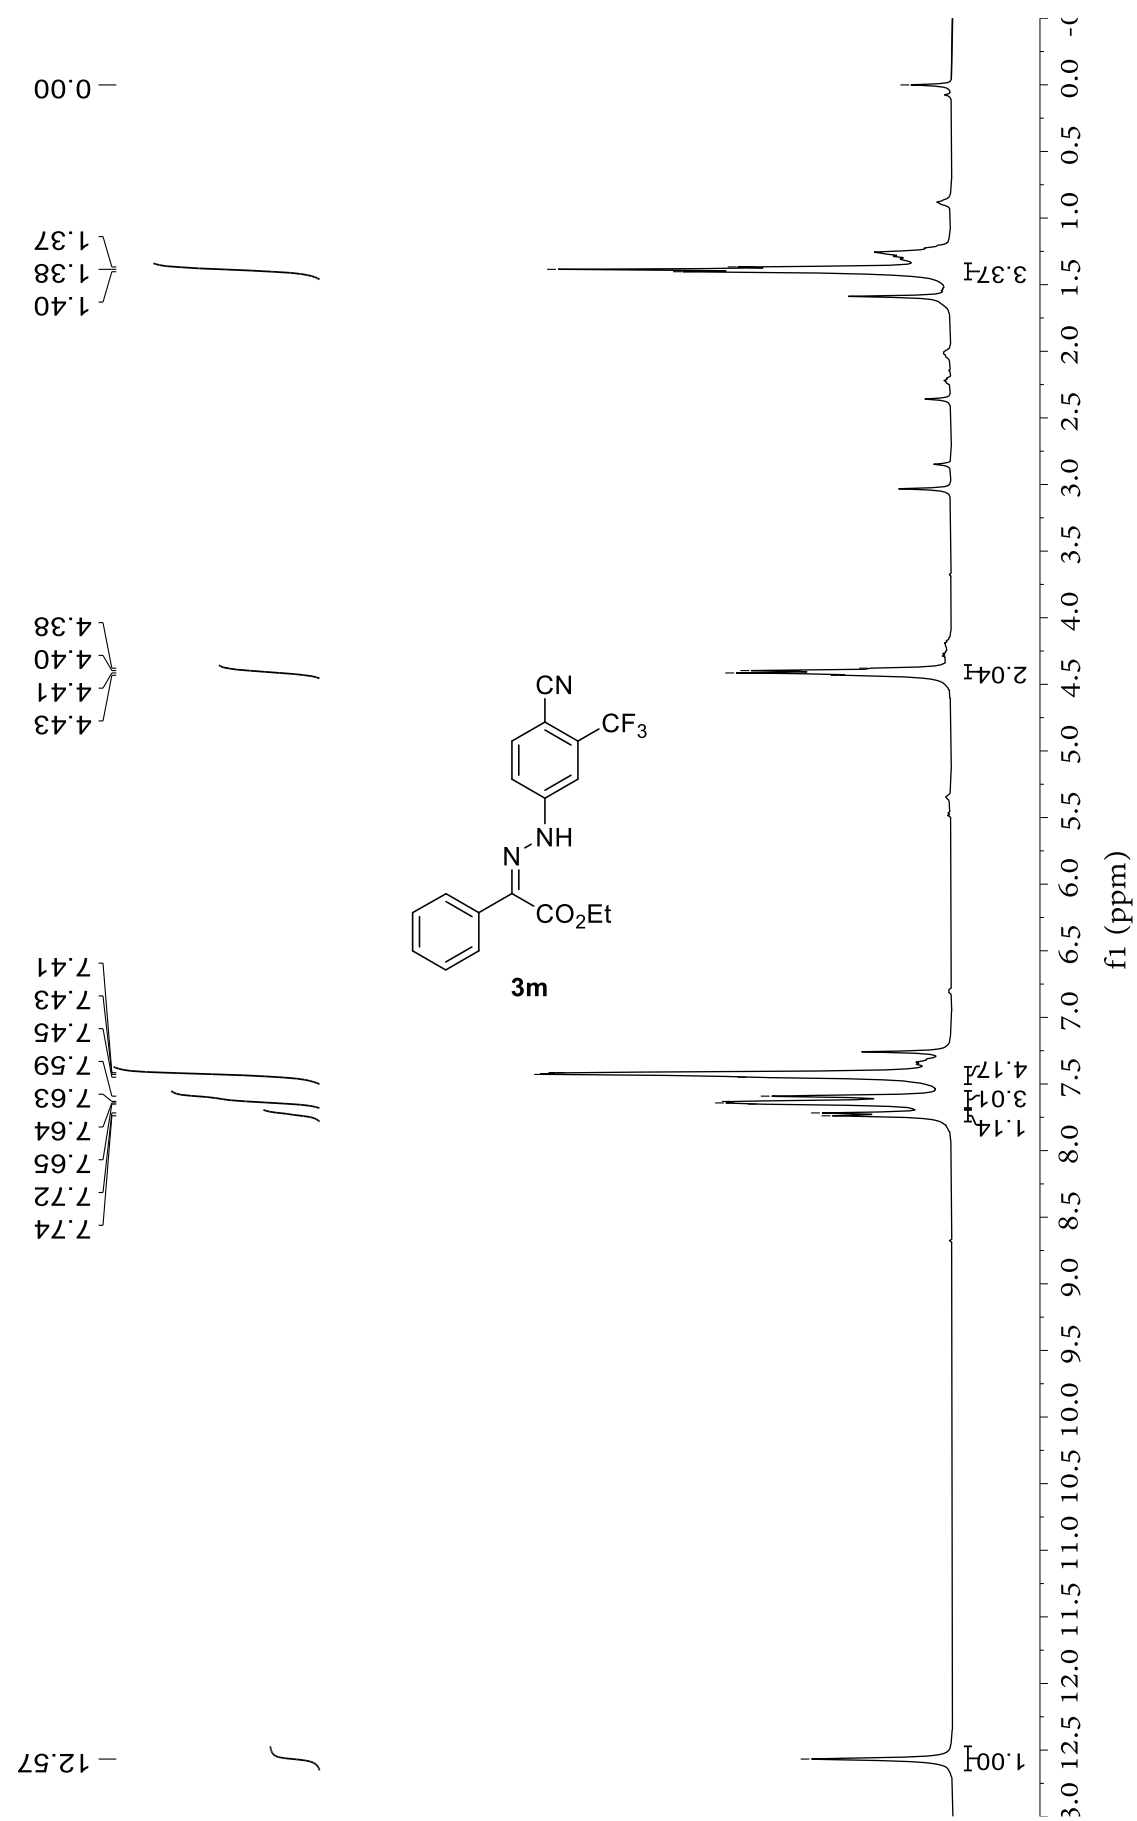

Compound **3m**  $^{13}\text{C}$  NMR (101 MHz,  $\text{CDCl}_3$ )

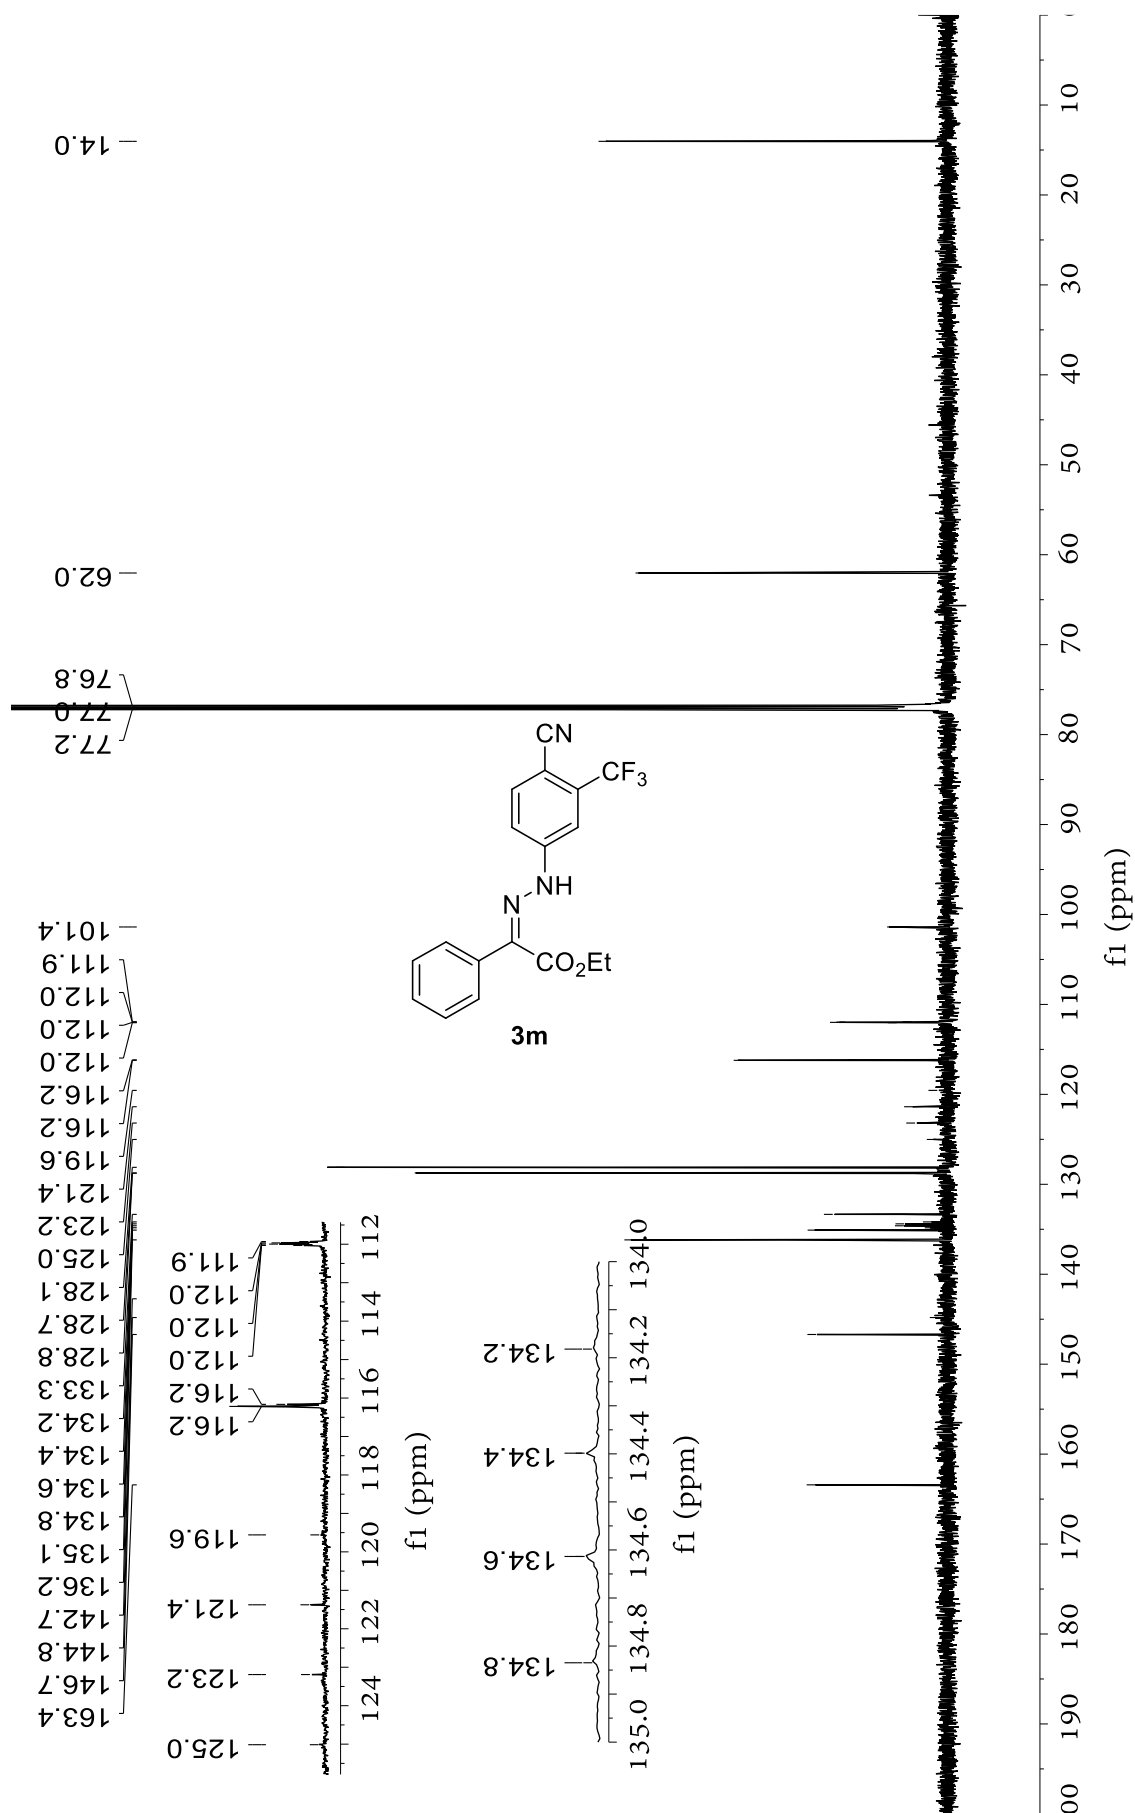

Compound **3m**  $^{19}\text{F}$  NMR (565 MHz,  $\text{CDCl}_3$ )

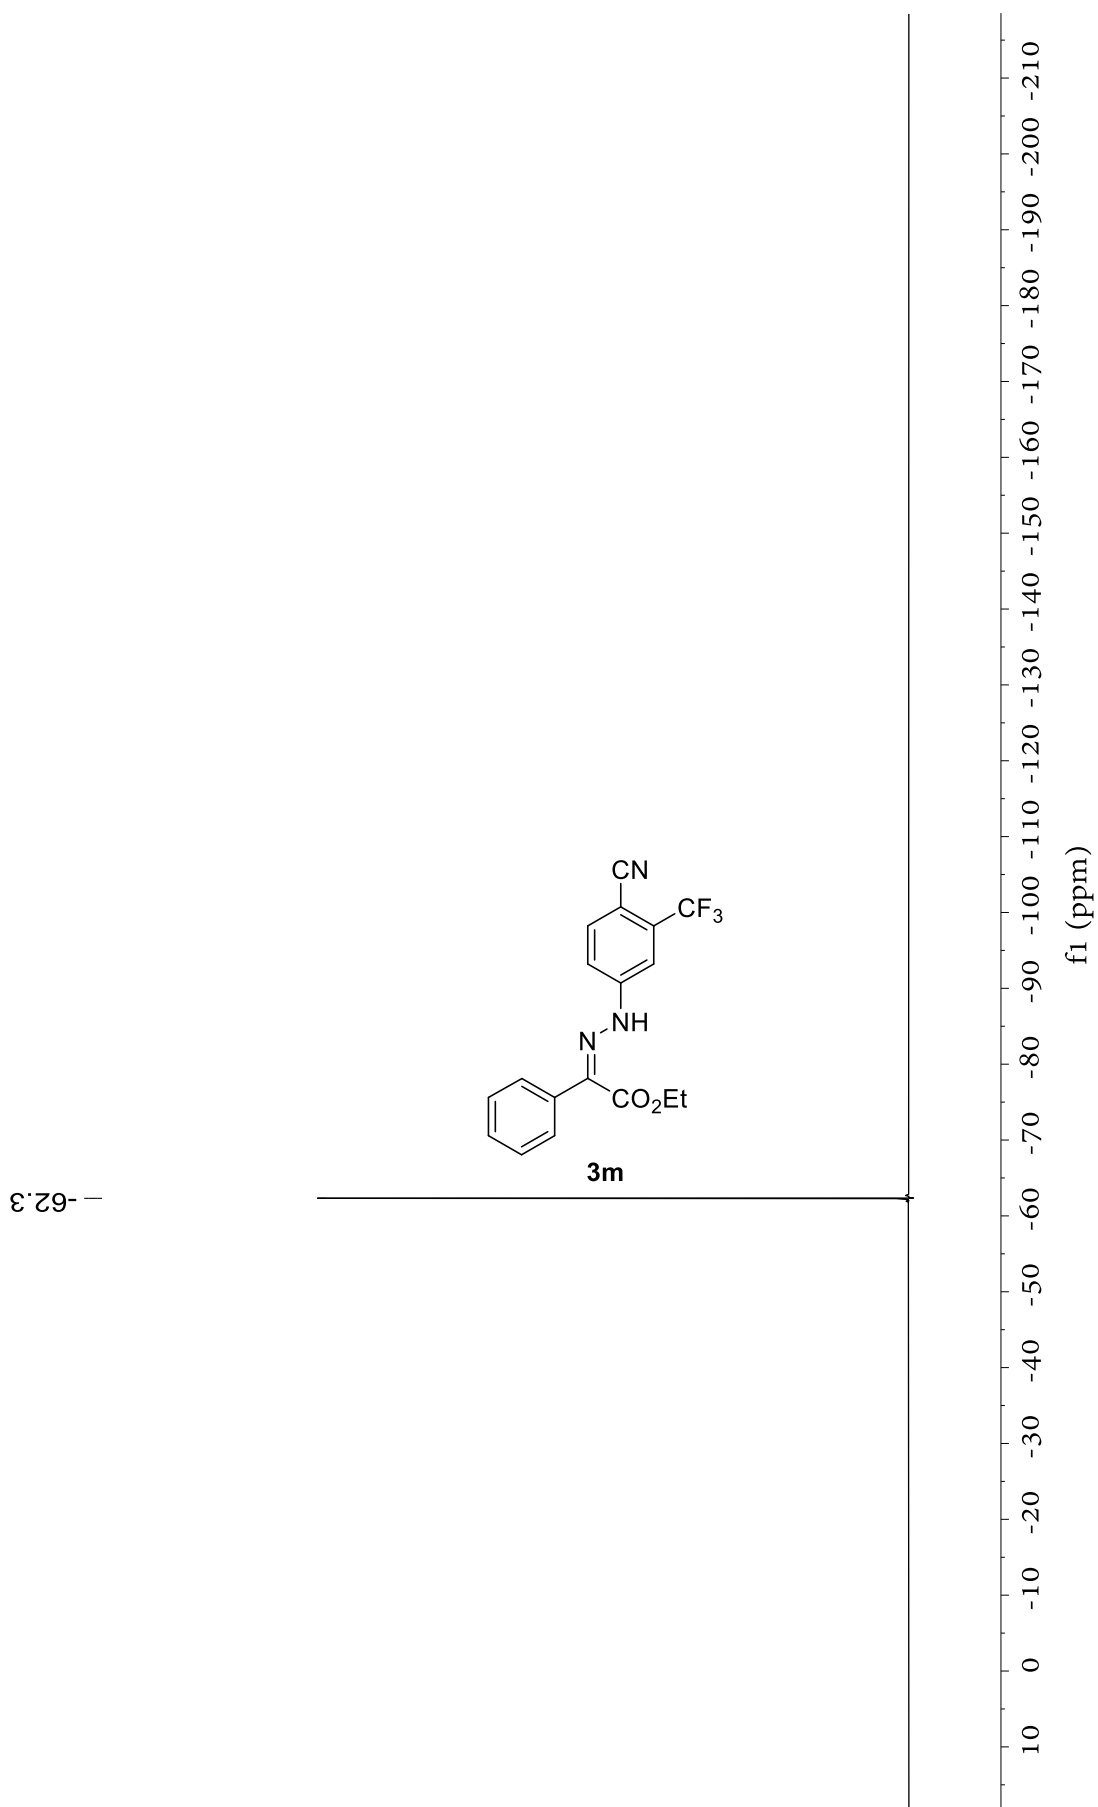

Compound **3n**  $^1\text{H}$  NMR (400 MHz,  $\text{CDCl}_3$ )

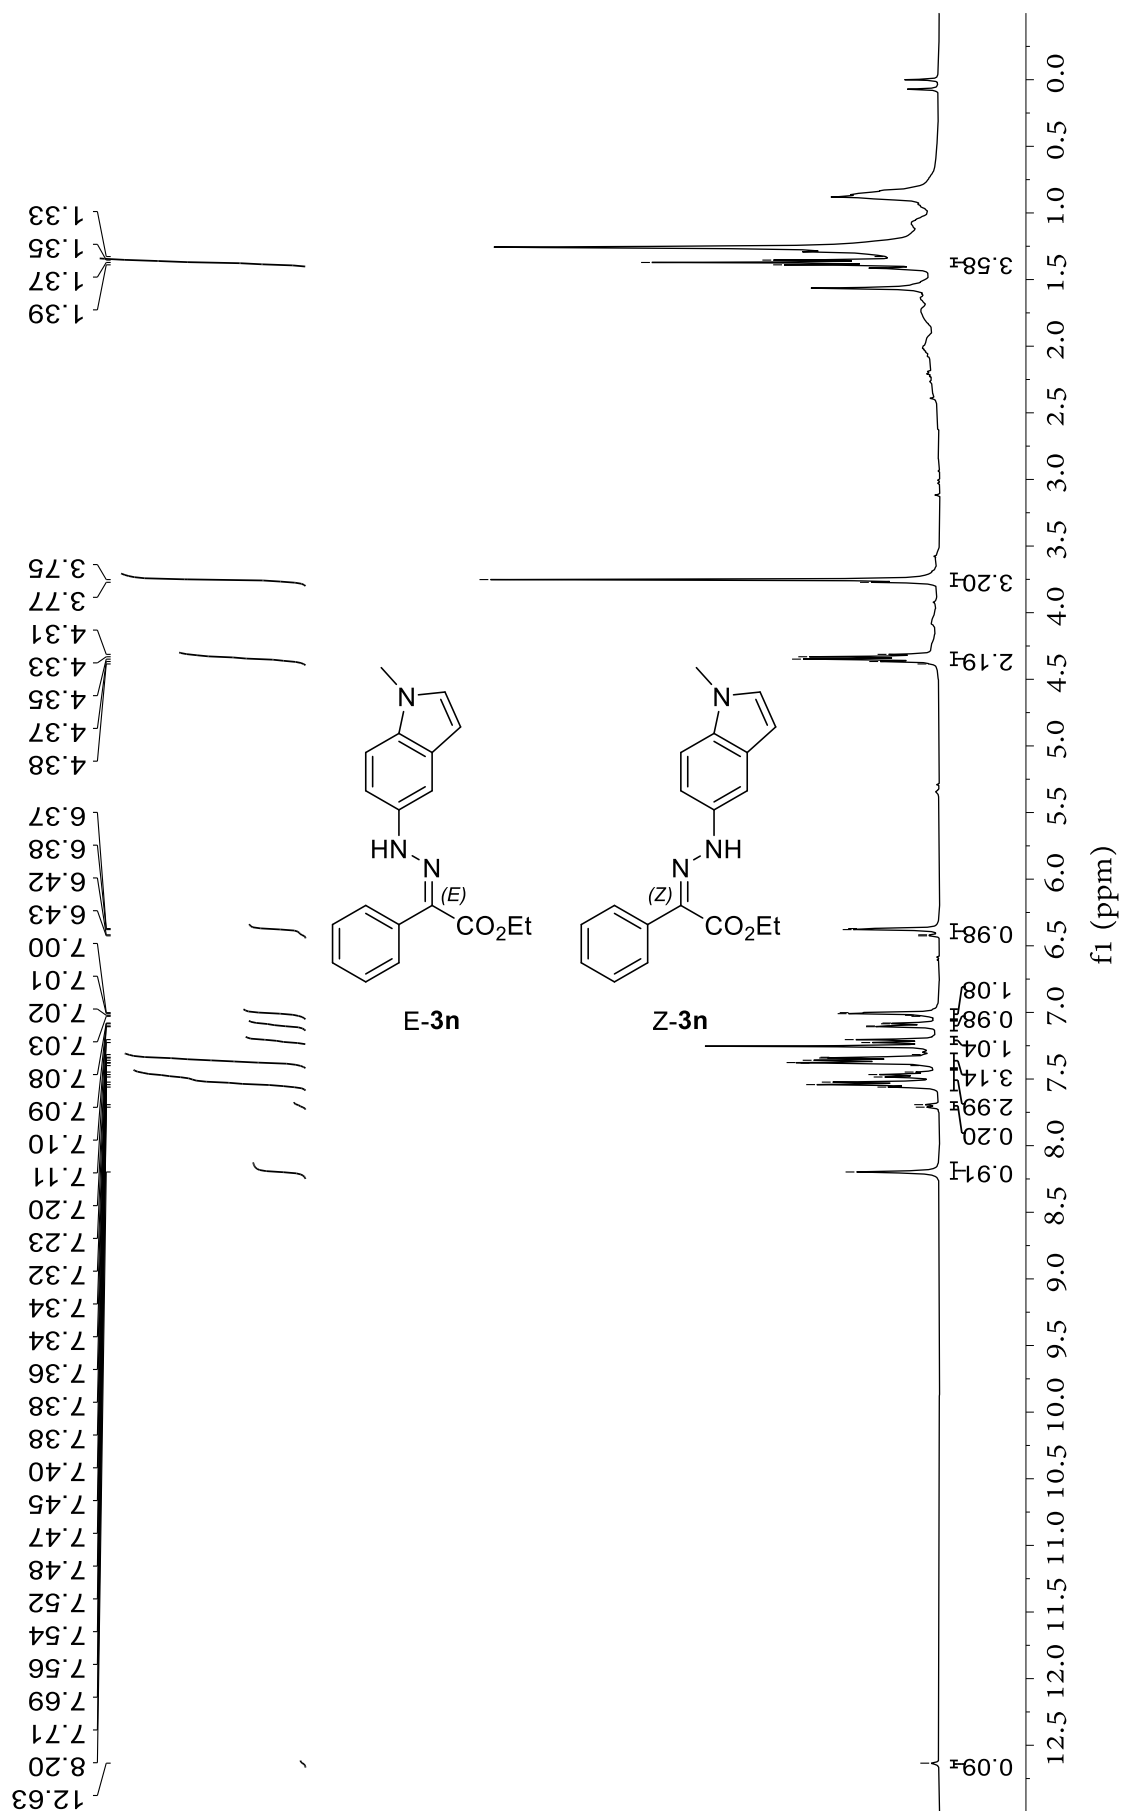

Compound **3n**  $^{13}\text{C}$  NMR (101 MHz,  $\text{CDCl}_3$ )

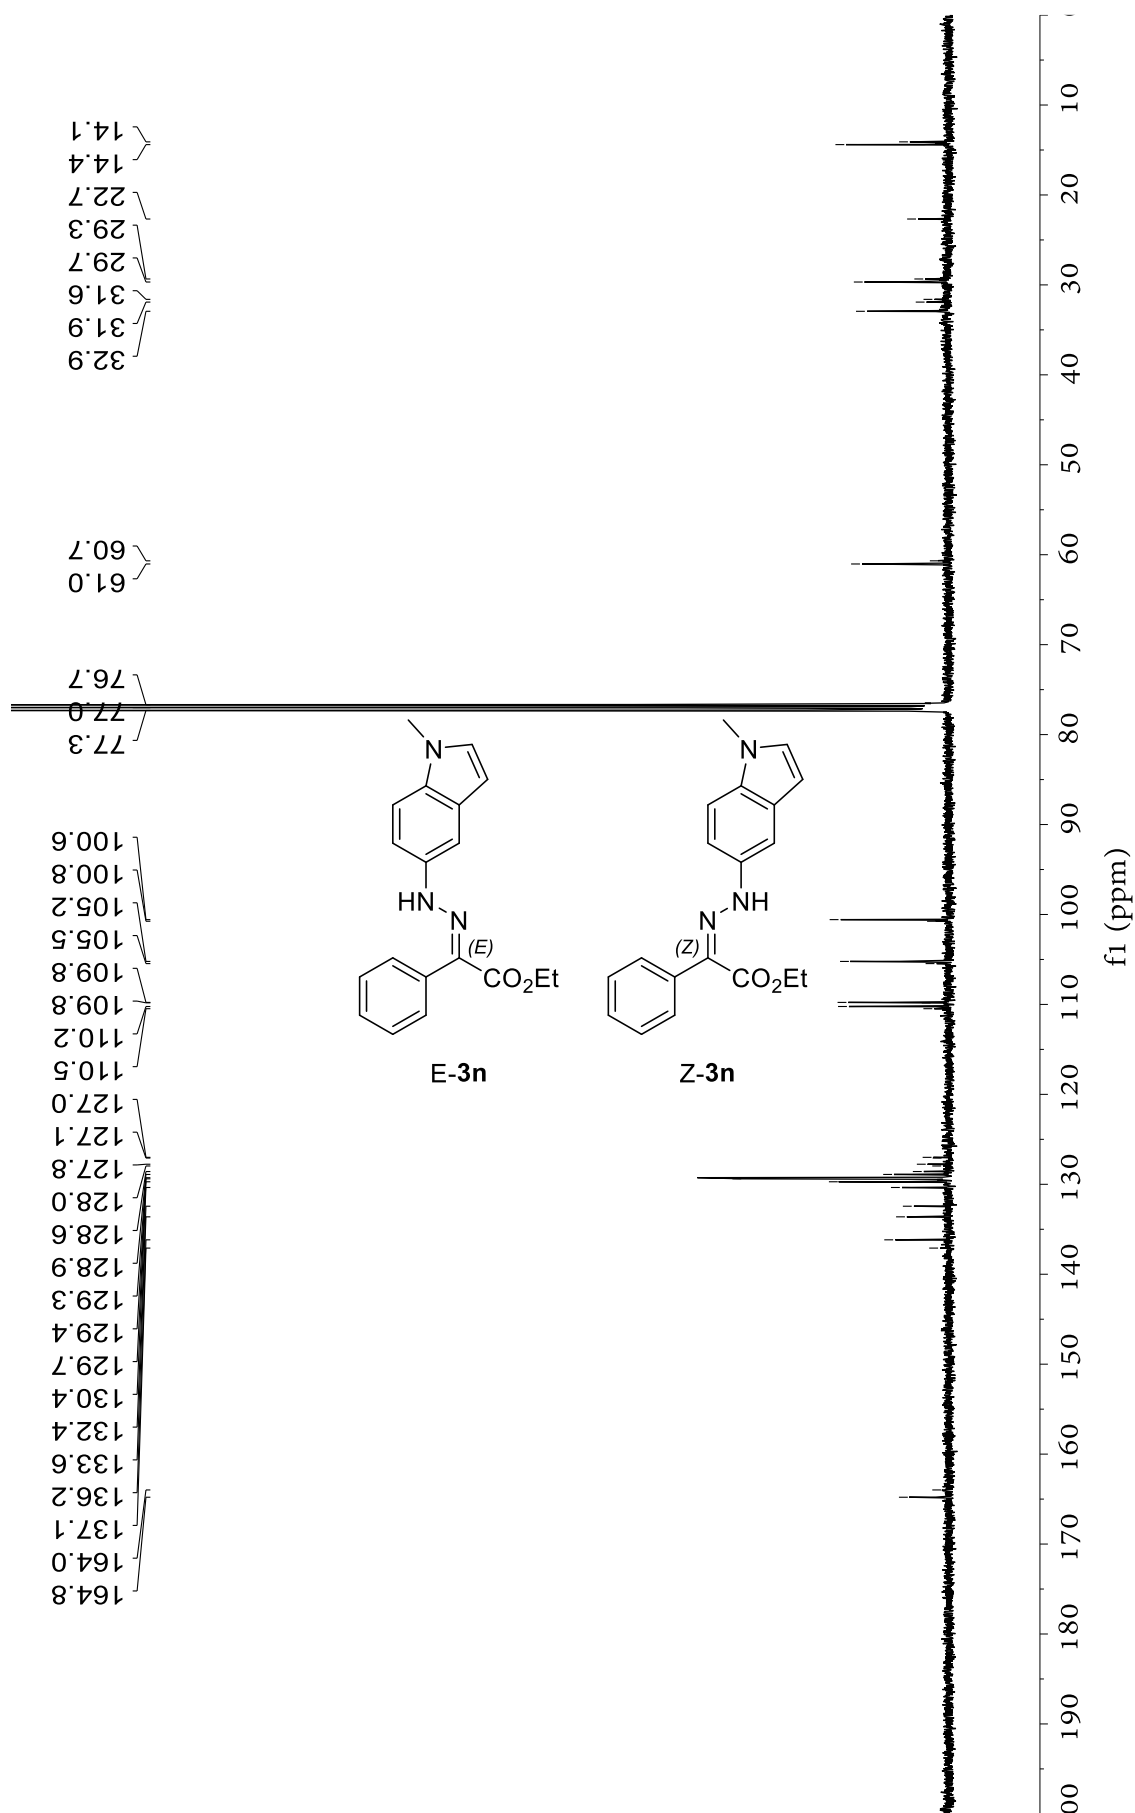



Compound **3o**  $^1\text{H}$  NMR (400 MHz,  $\text{CDCl}_3$ )

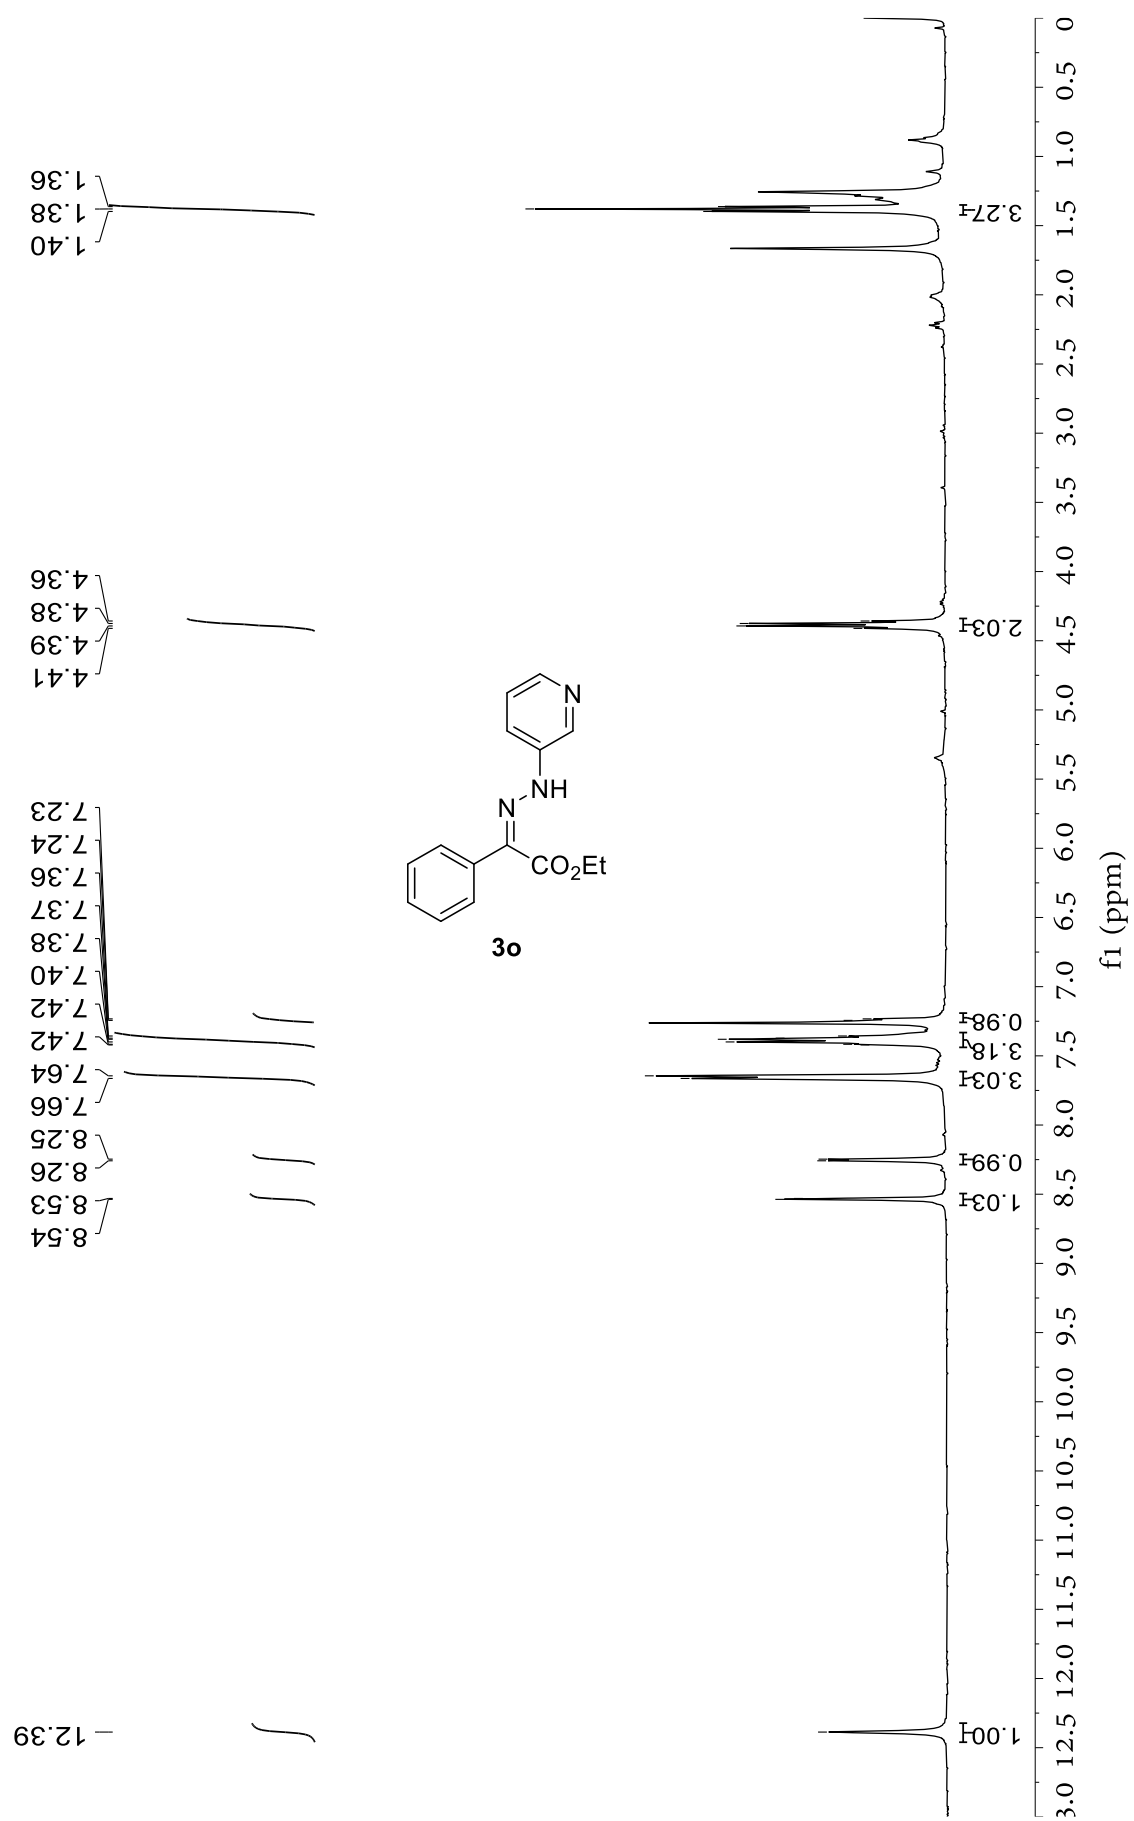

Compound **3o**  $^{13}\text{C}$  NMR (101 MHz,  $\text{CDCl}_3$ )

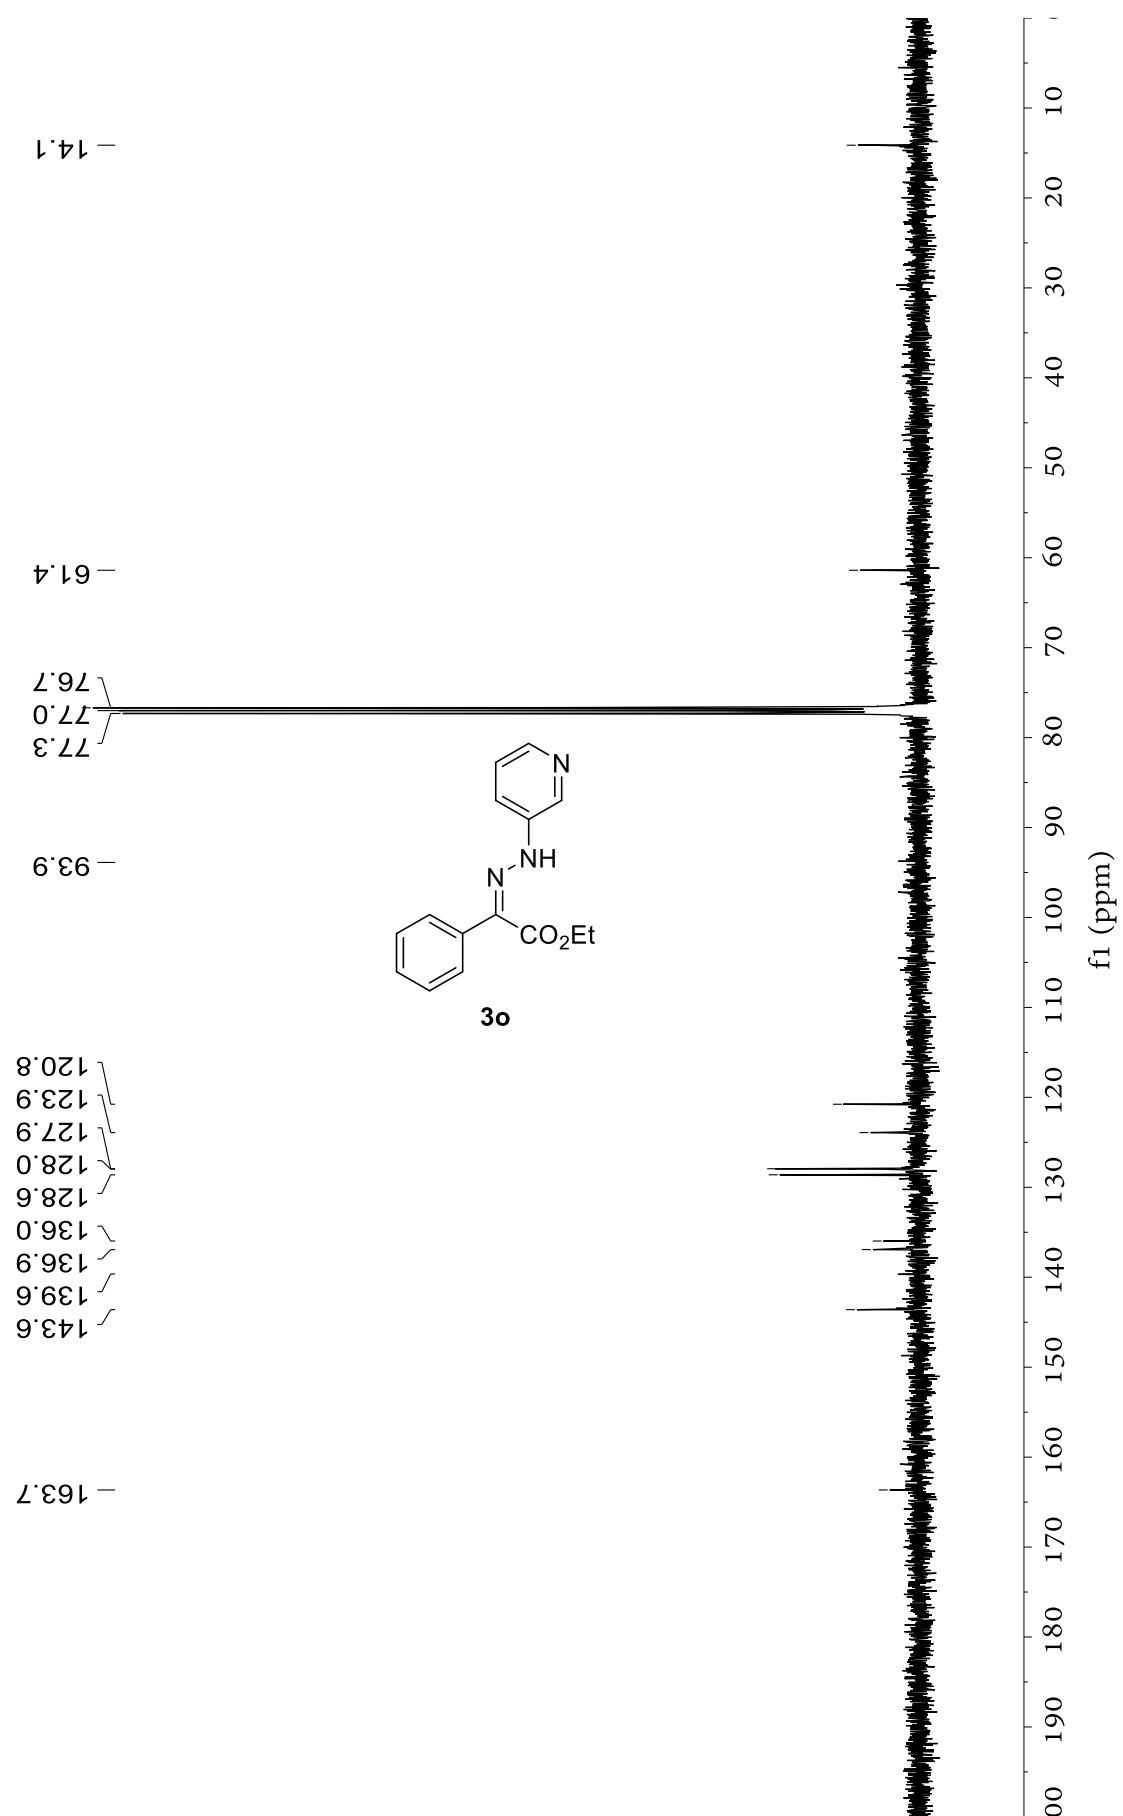

Compound **3p**  $^1\text{H}$  NMR (400 MHz,  $\text{CDCl}_3$ )

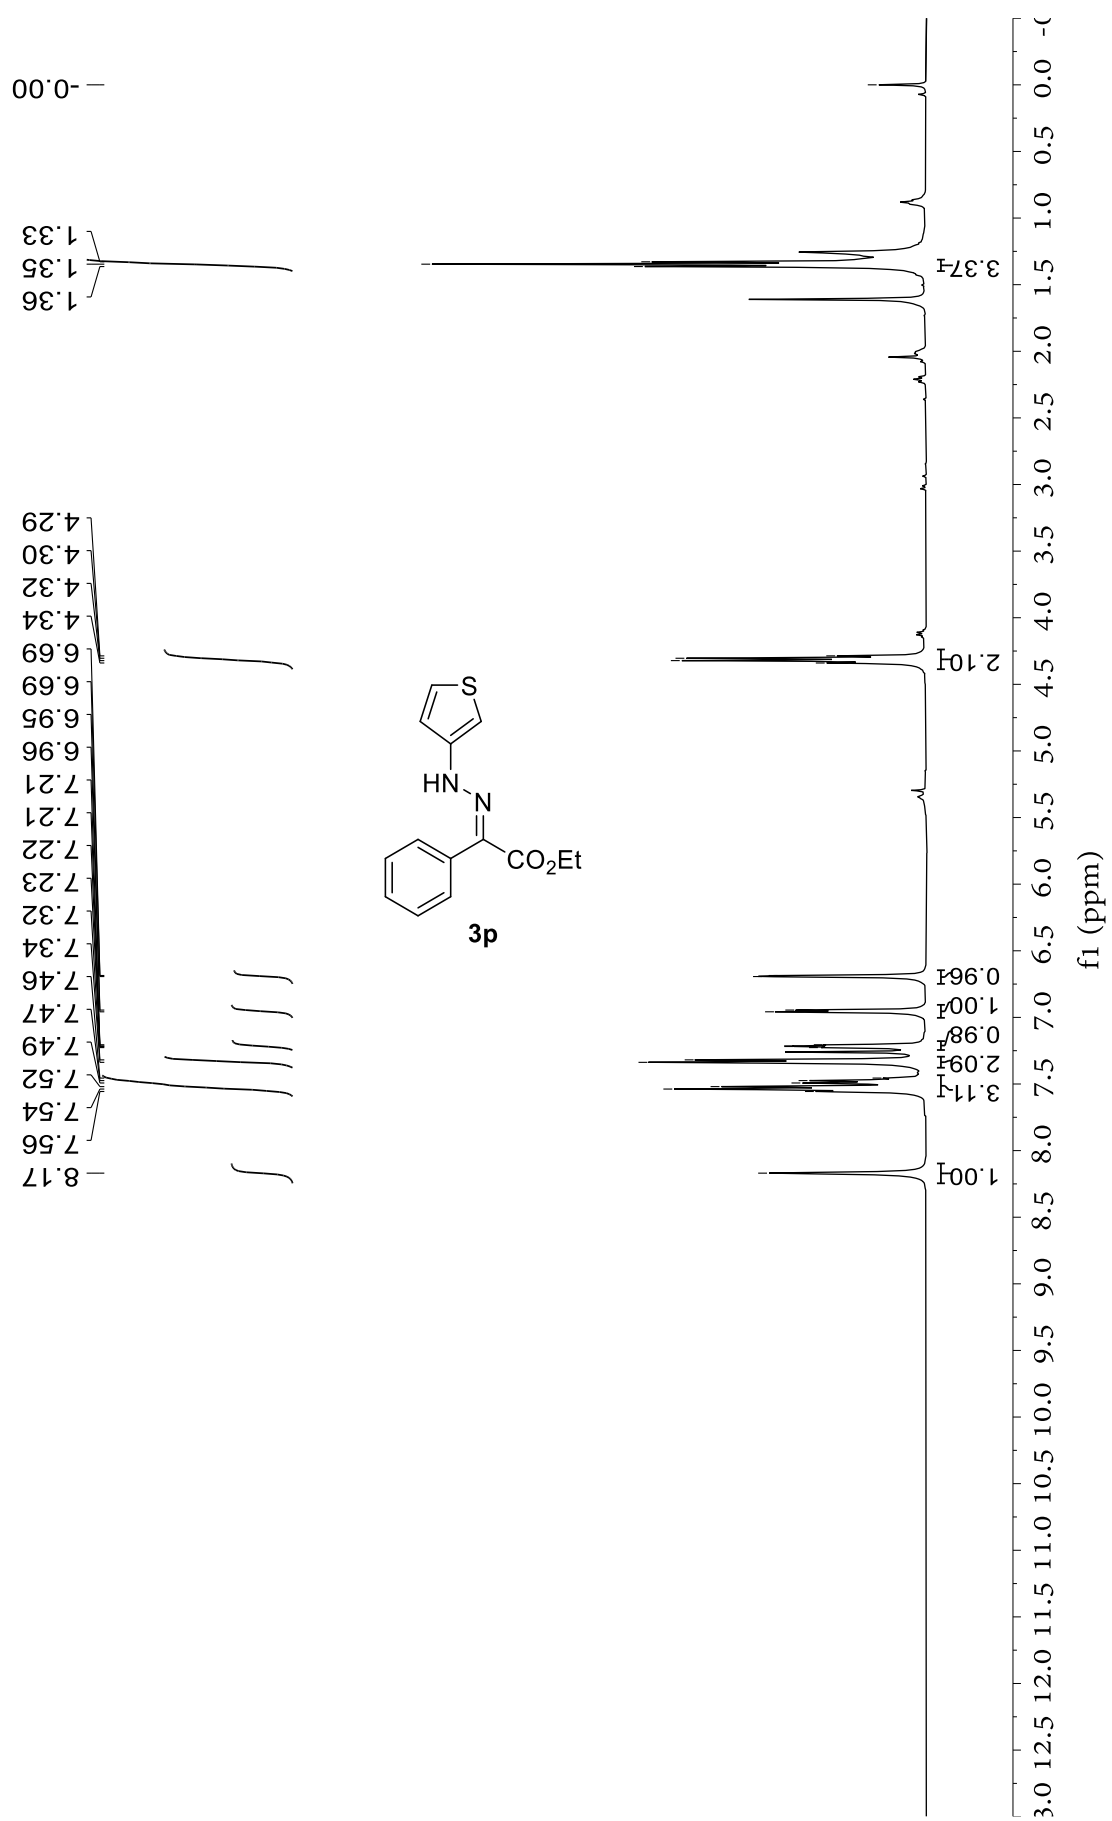

Compound **3p**  $^{13}\text{C}$  NMR (101 MHz,  $\text{CDCl}_3$ )

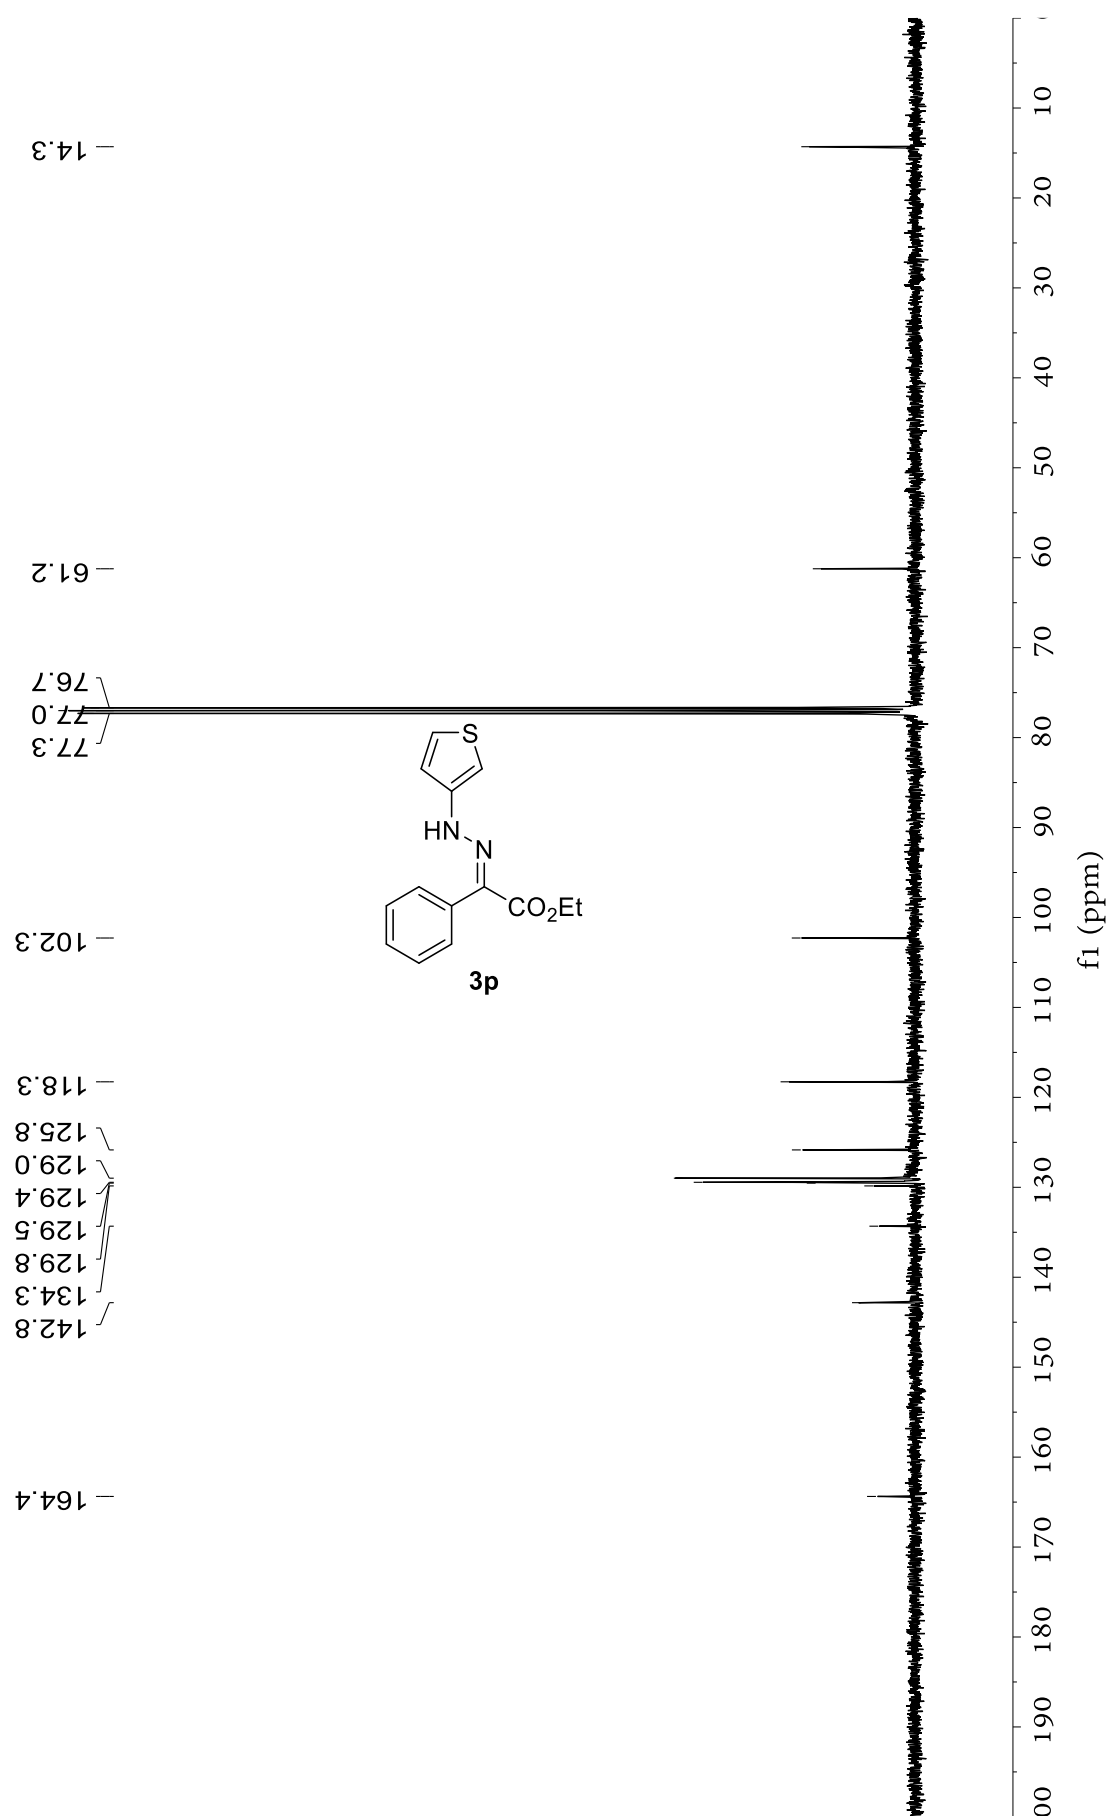

Compound **3q**  $^1\text{H}$  NMR (600 MHz,  $\text{CDCl}_3$ )

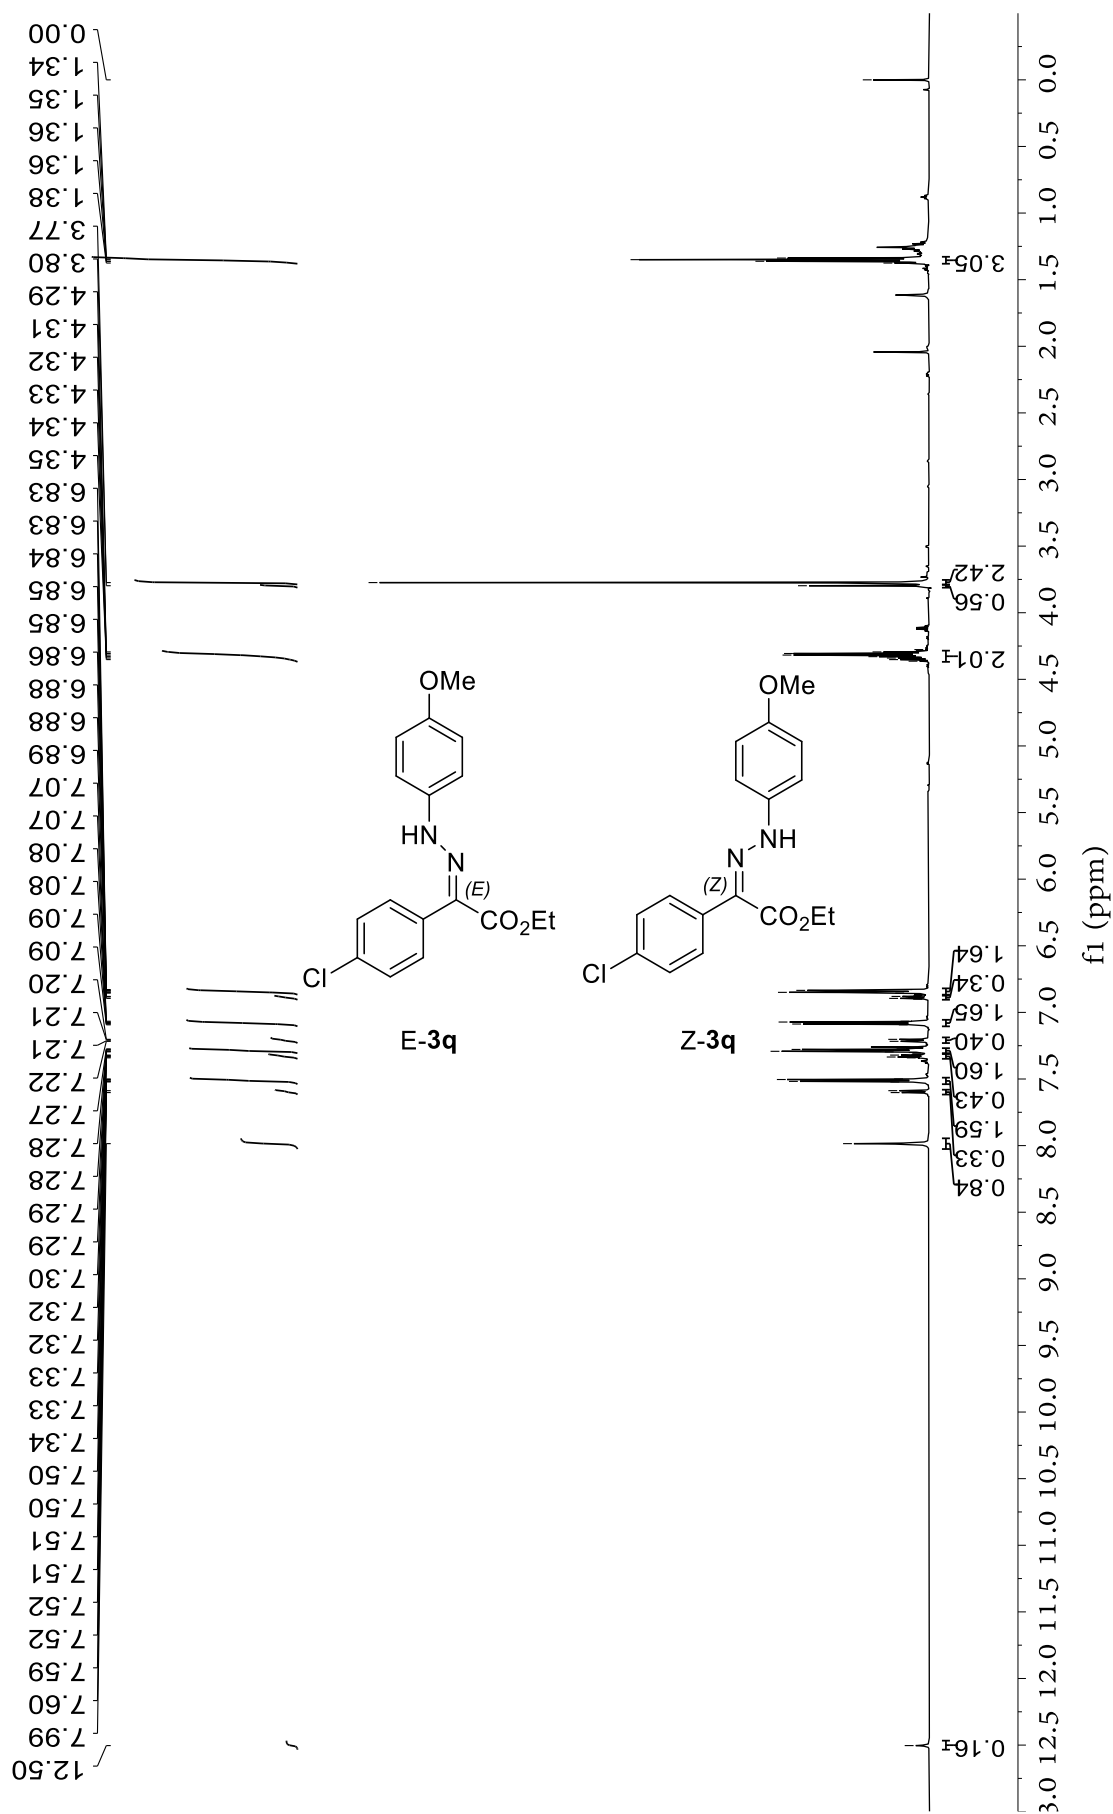

Compound **3q**  $^{13}\text{C}$  NMR (151 MHz,  $\text{CDCl}_3$ )

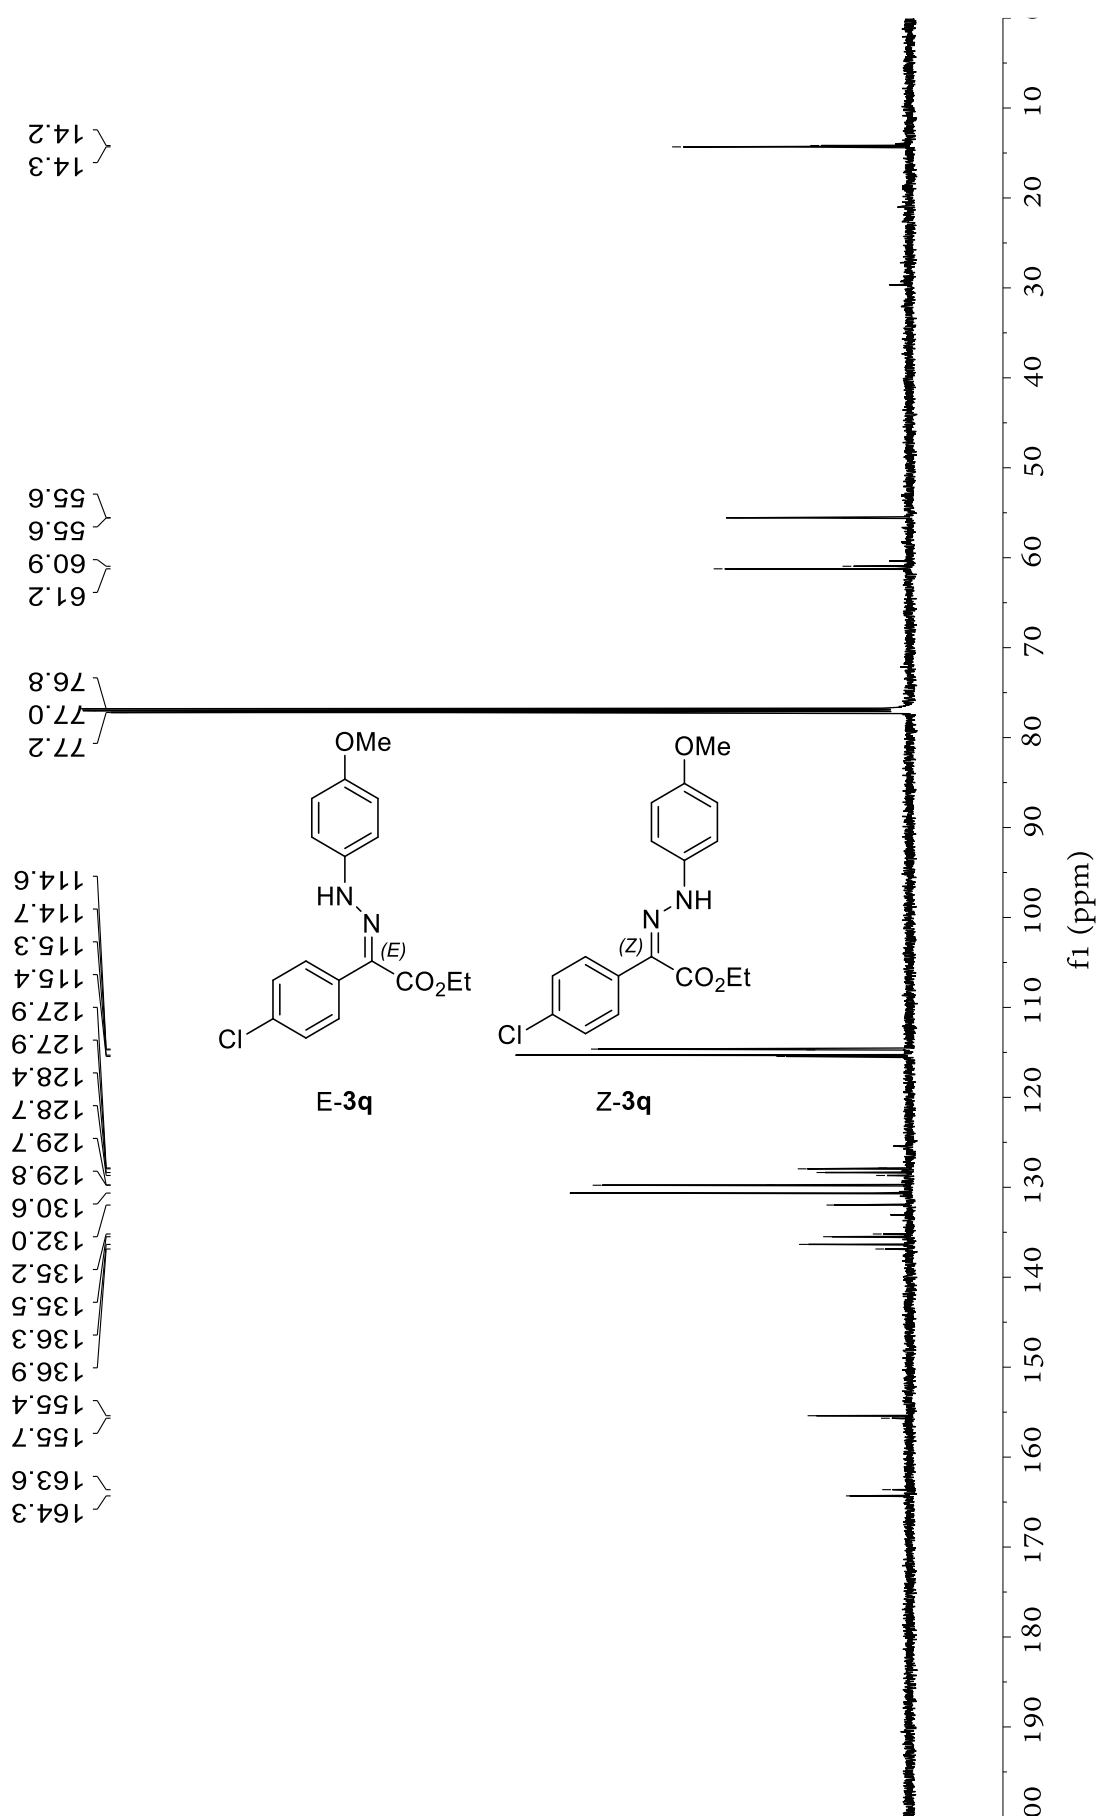

Compound **3r**  $^1\text{H}$  NMR (600 MHz,  $\text{CDCl}_3$ )

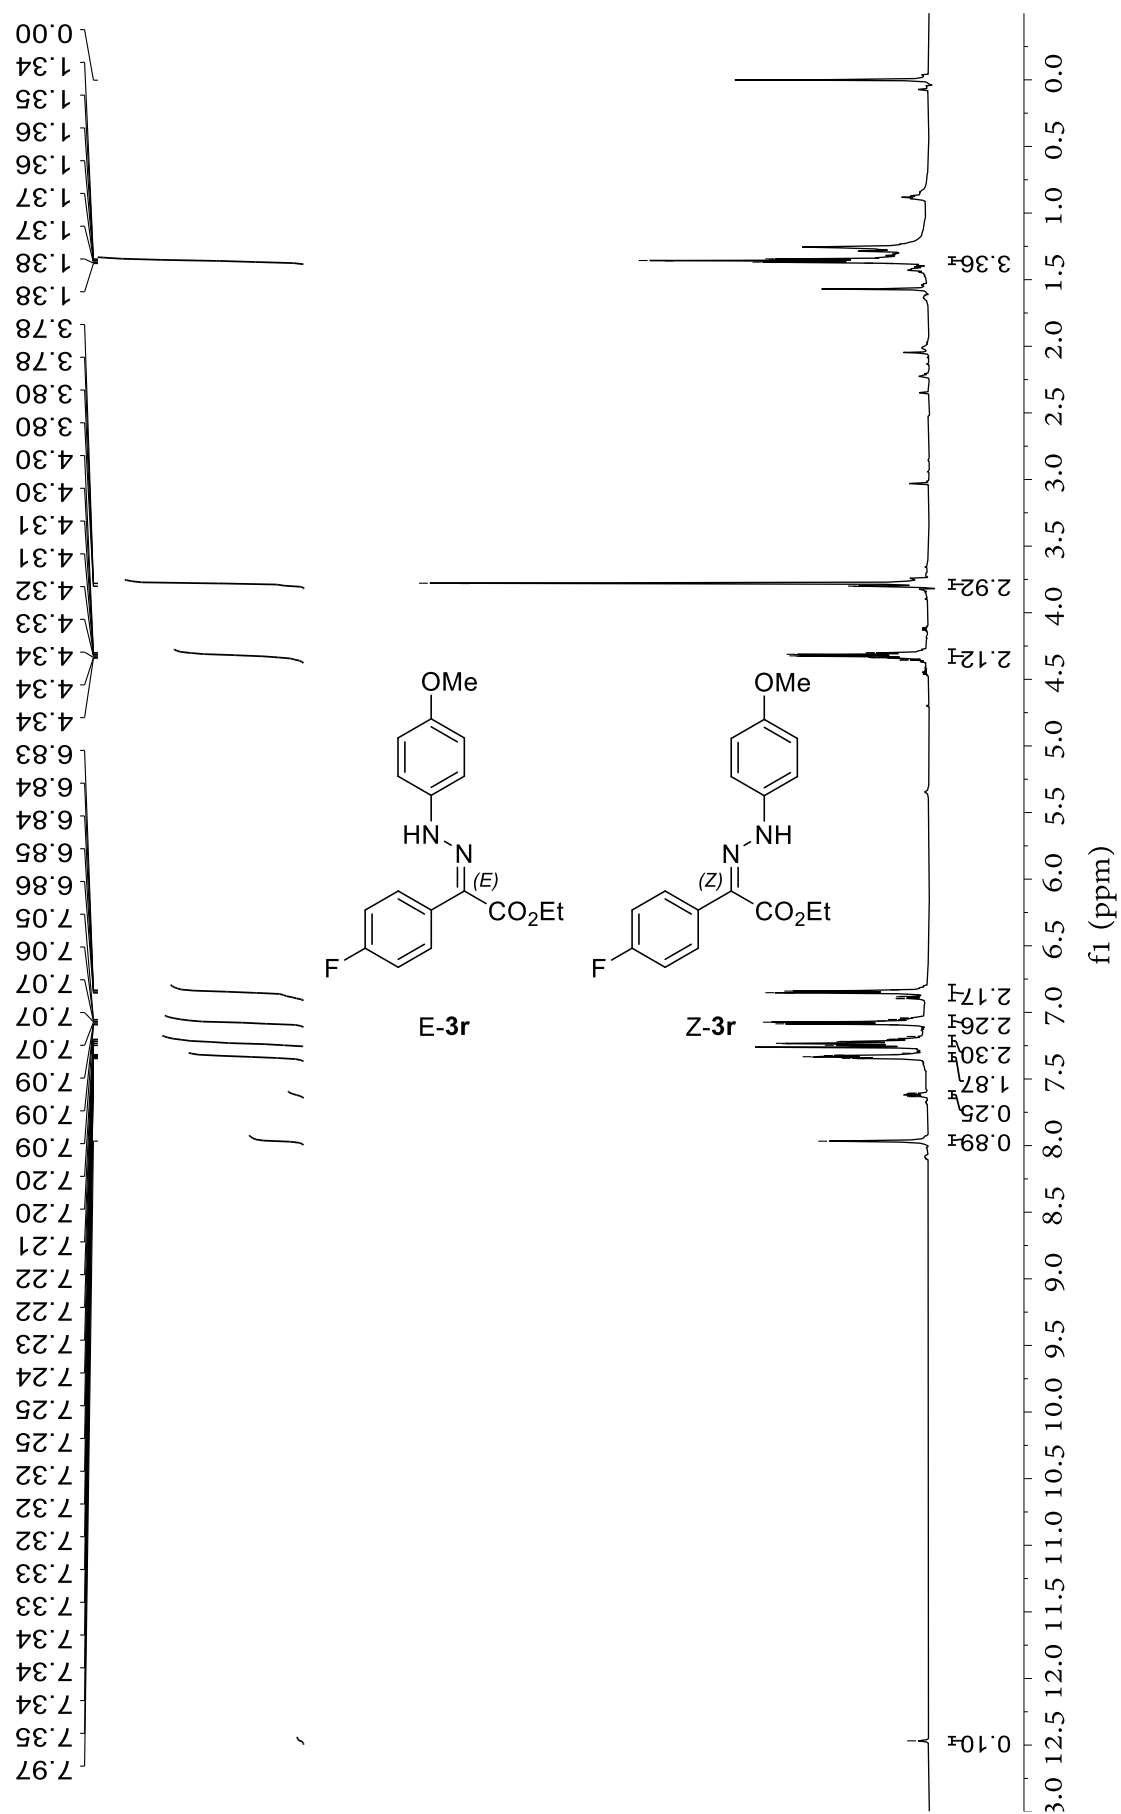

Compound **3r**  $^{13}\text{C}$  NMR (151 MHz,  $\text{CDCl}_3$ )

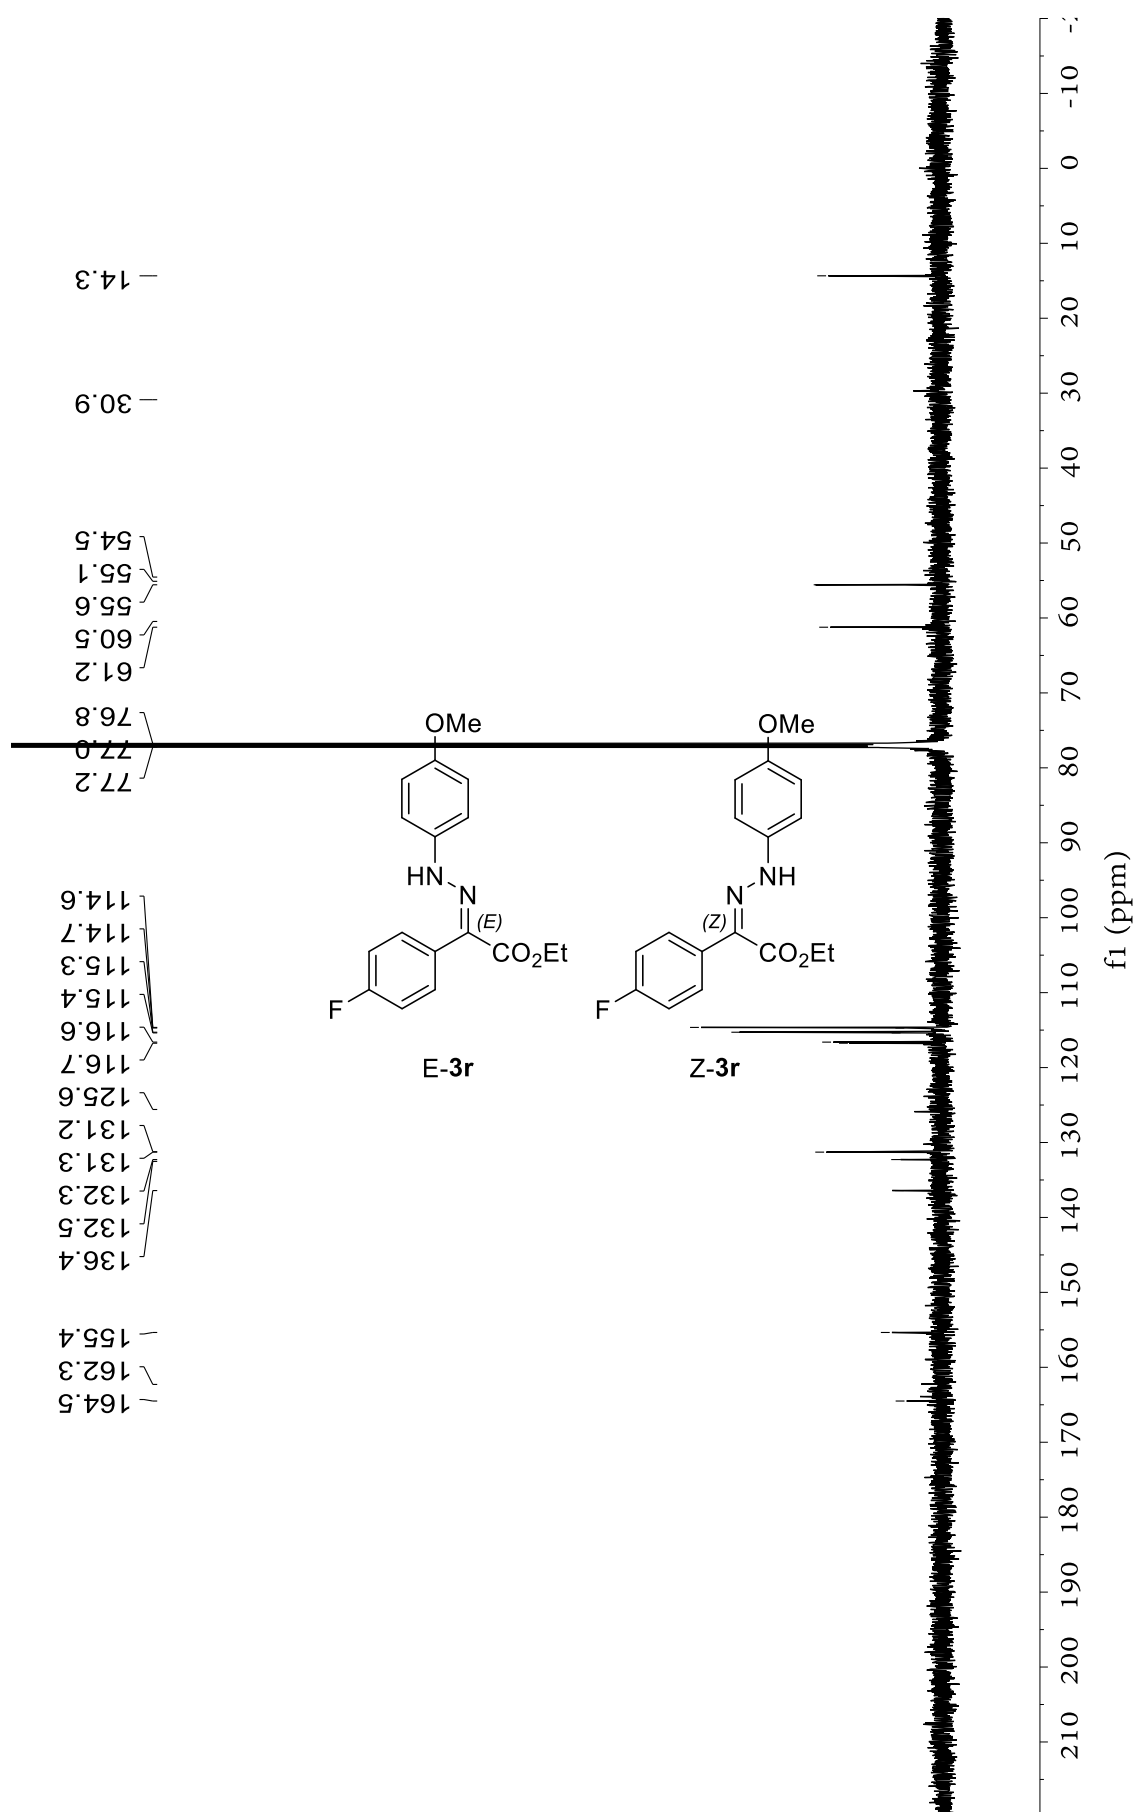



Compound **3r**  $^{19}\text{F}$  NMR (565 MHz,  $\text{CDCl}_3$ )

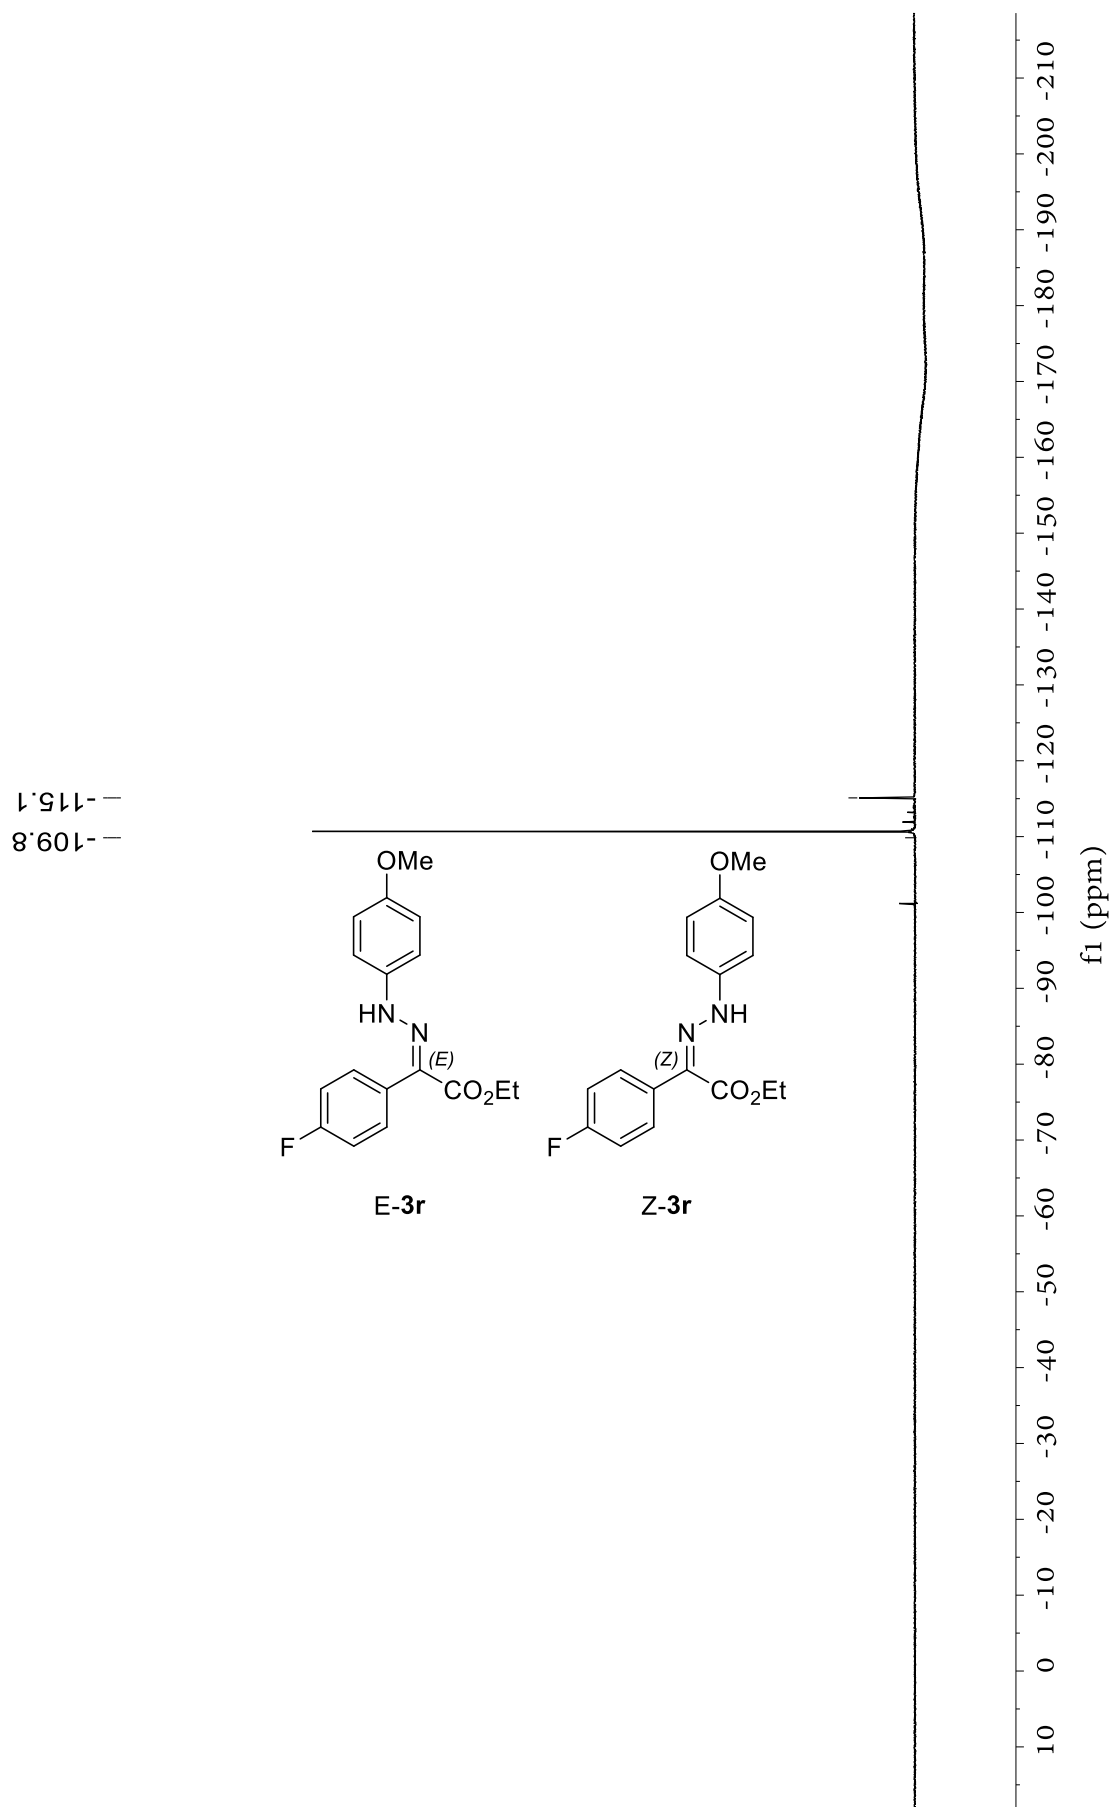

Compound **3s**  $^1\text{H}$  NMR (400 MHz,  $\text{CDCl}_3$ )

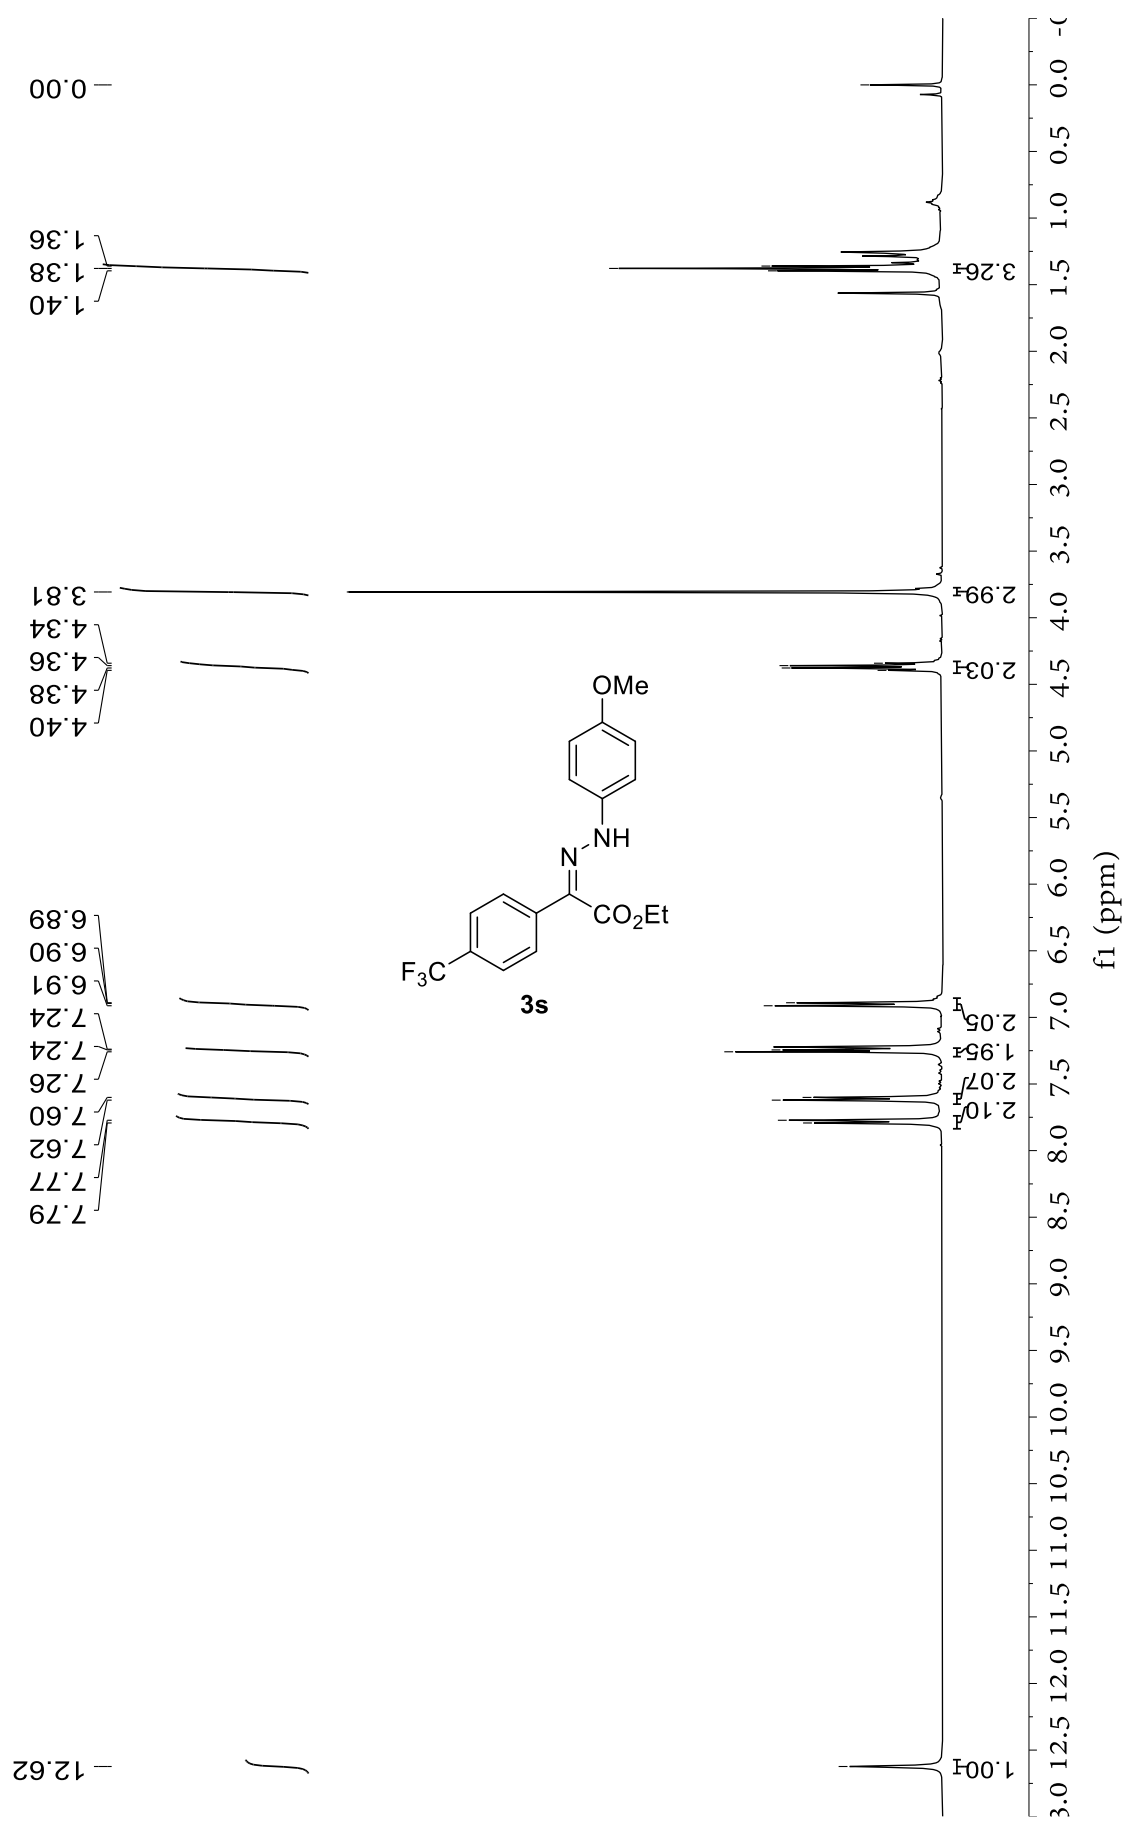

Compound **3s**  $^{13}\text{C}$  NMR (101 MHz,  $\text{CDCl}_3$ )

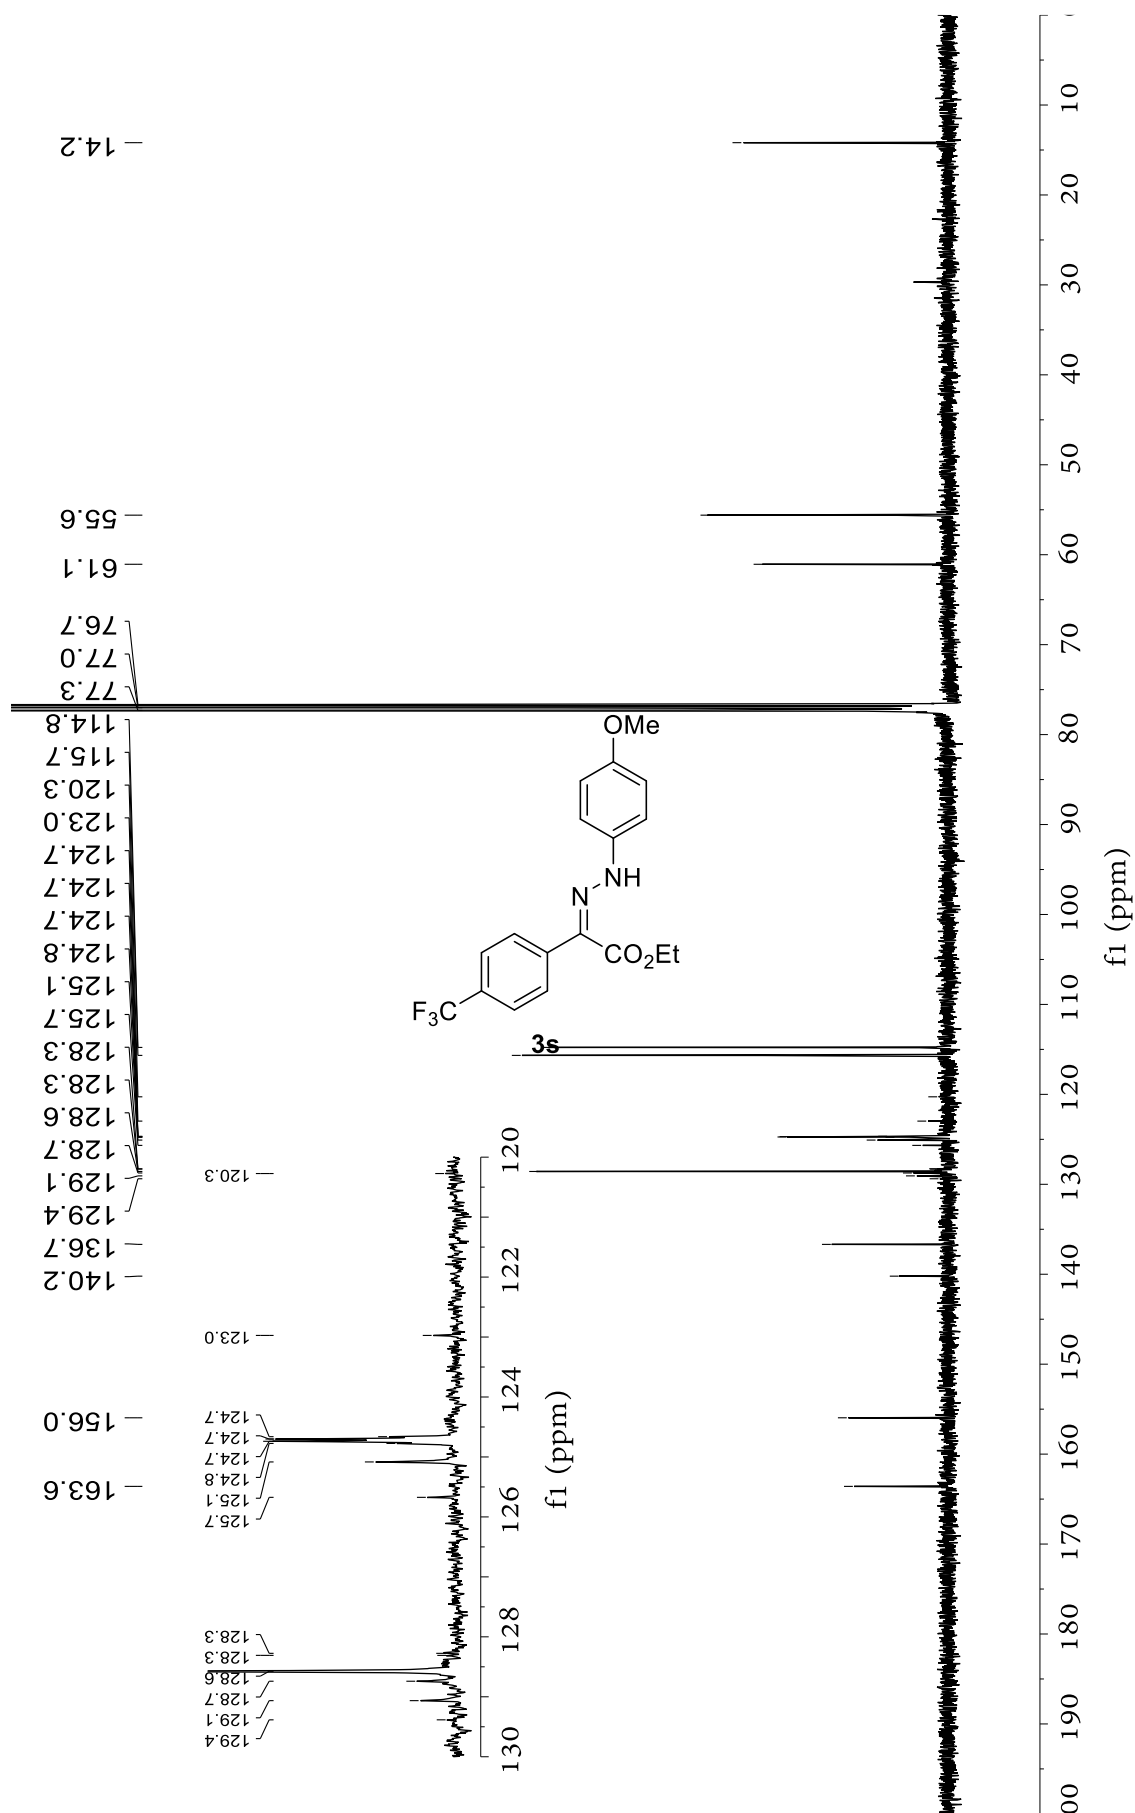

Compound **3s**  $^{19}\text{F}$  NMR (376 MHz,  $\text{CDCl}_3$ )

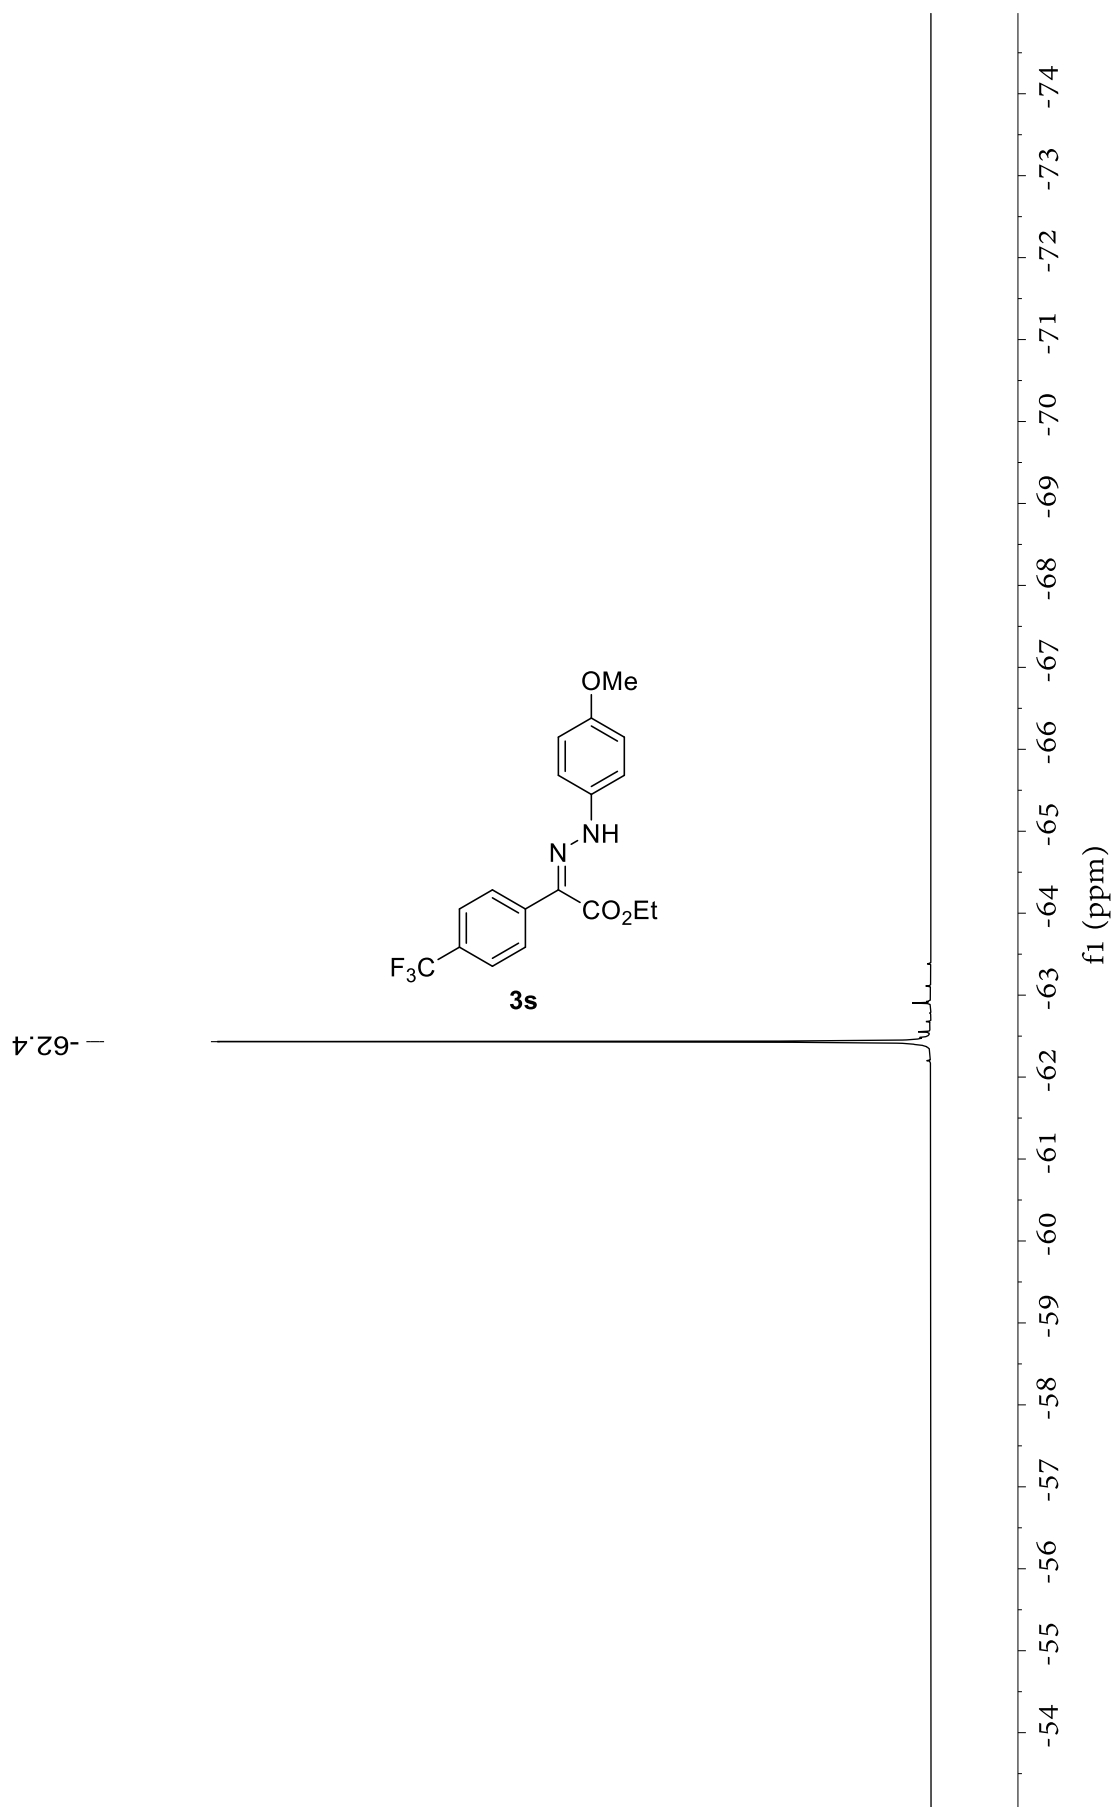

Compound **3t**  $^1\text{H}$  NMR (400 MHz,  $\text{CDCl}_3$ )

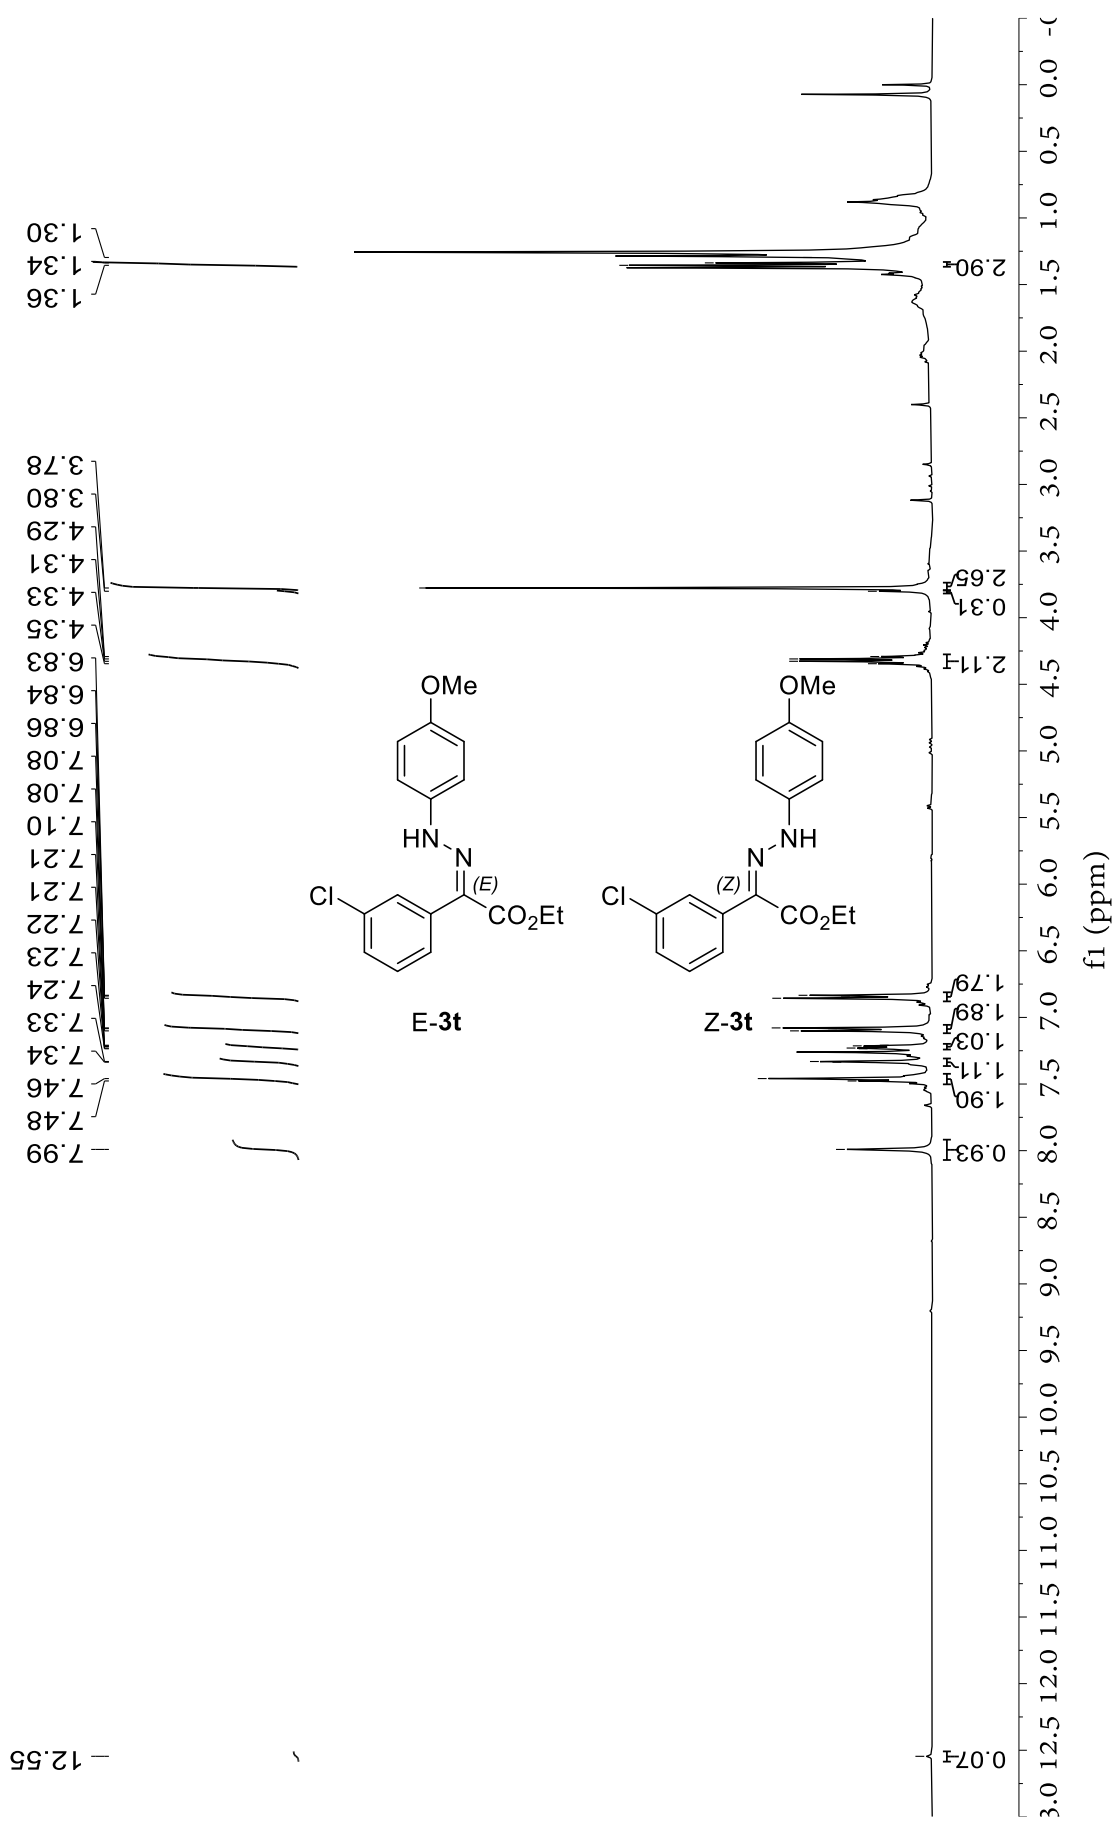

Compound **3t**  $^{13}\text{C}$  NMR (101 MHz,  $\text{CDCl}_3$ )

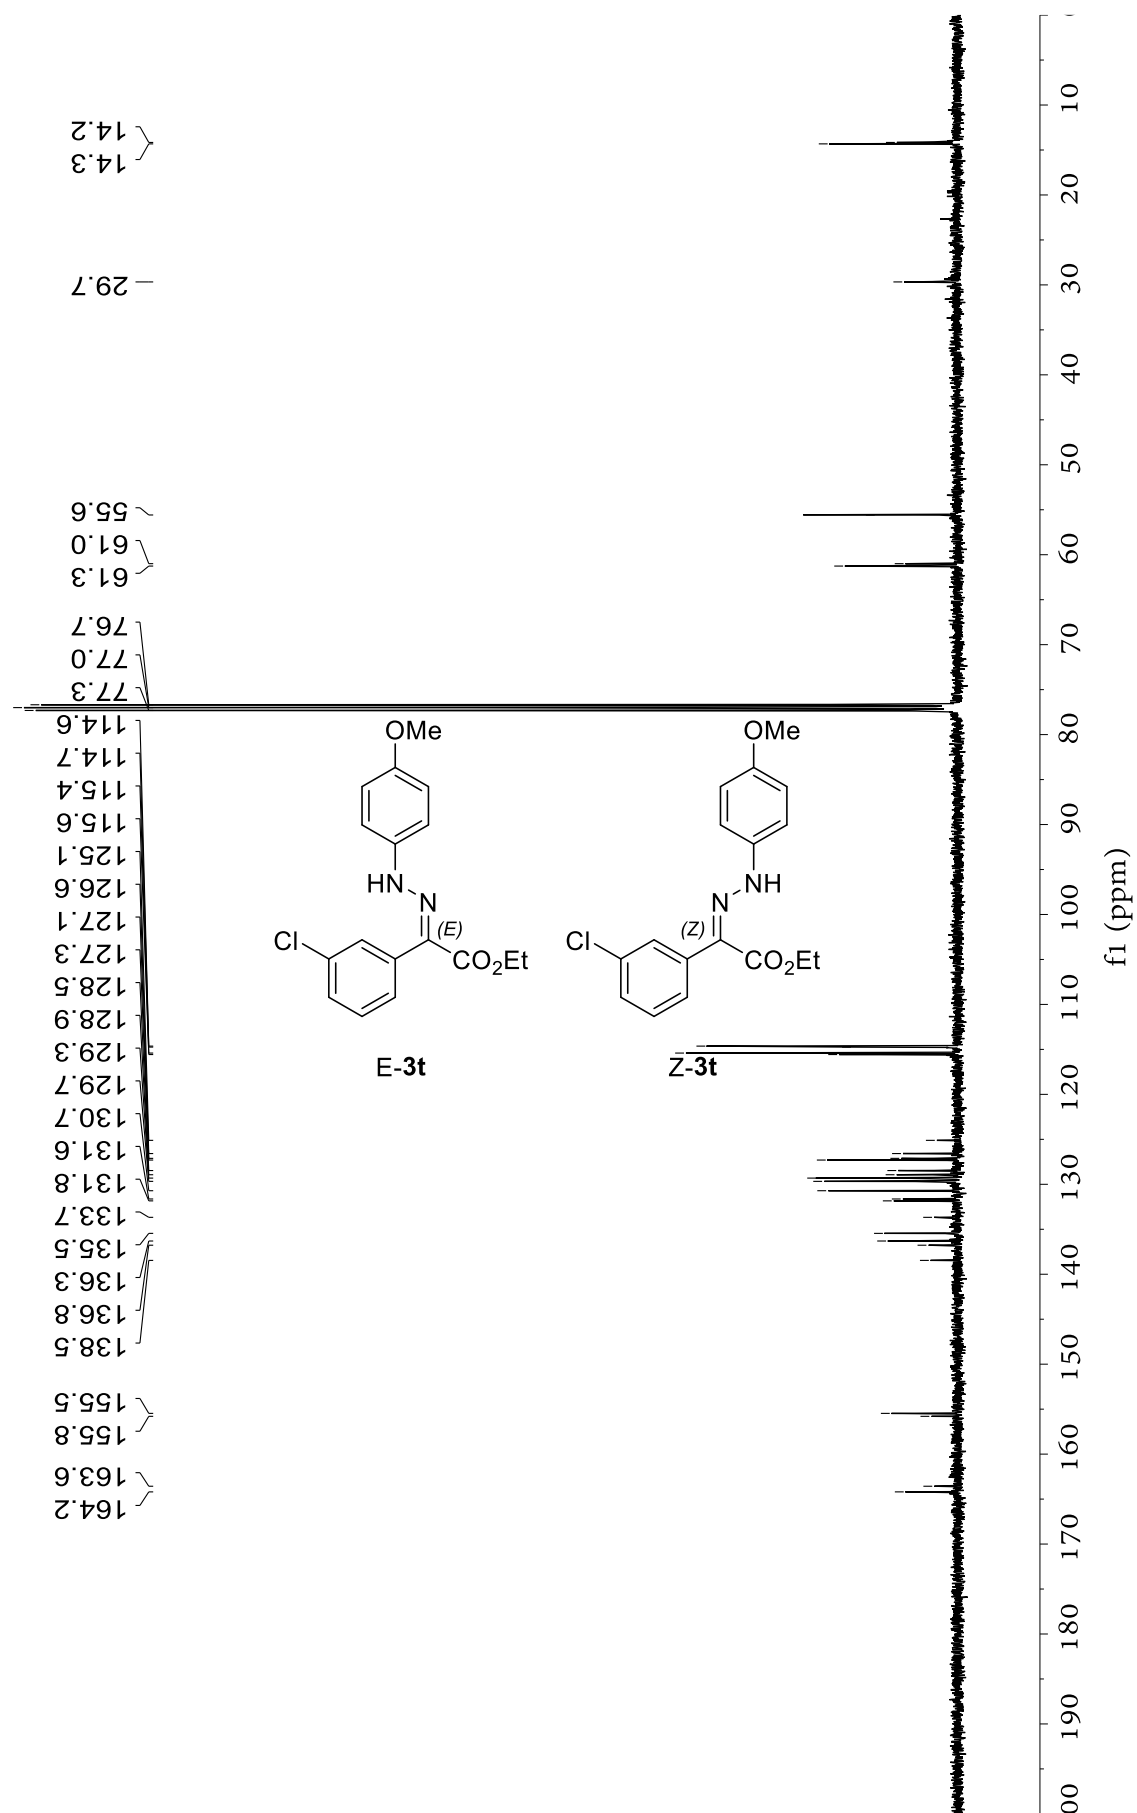

Compound **3u**  $^1\text{H}$  NMR (600 MHz,  $\text{CDCl}_3$ )

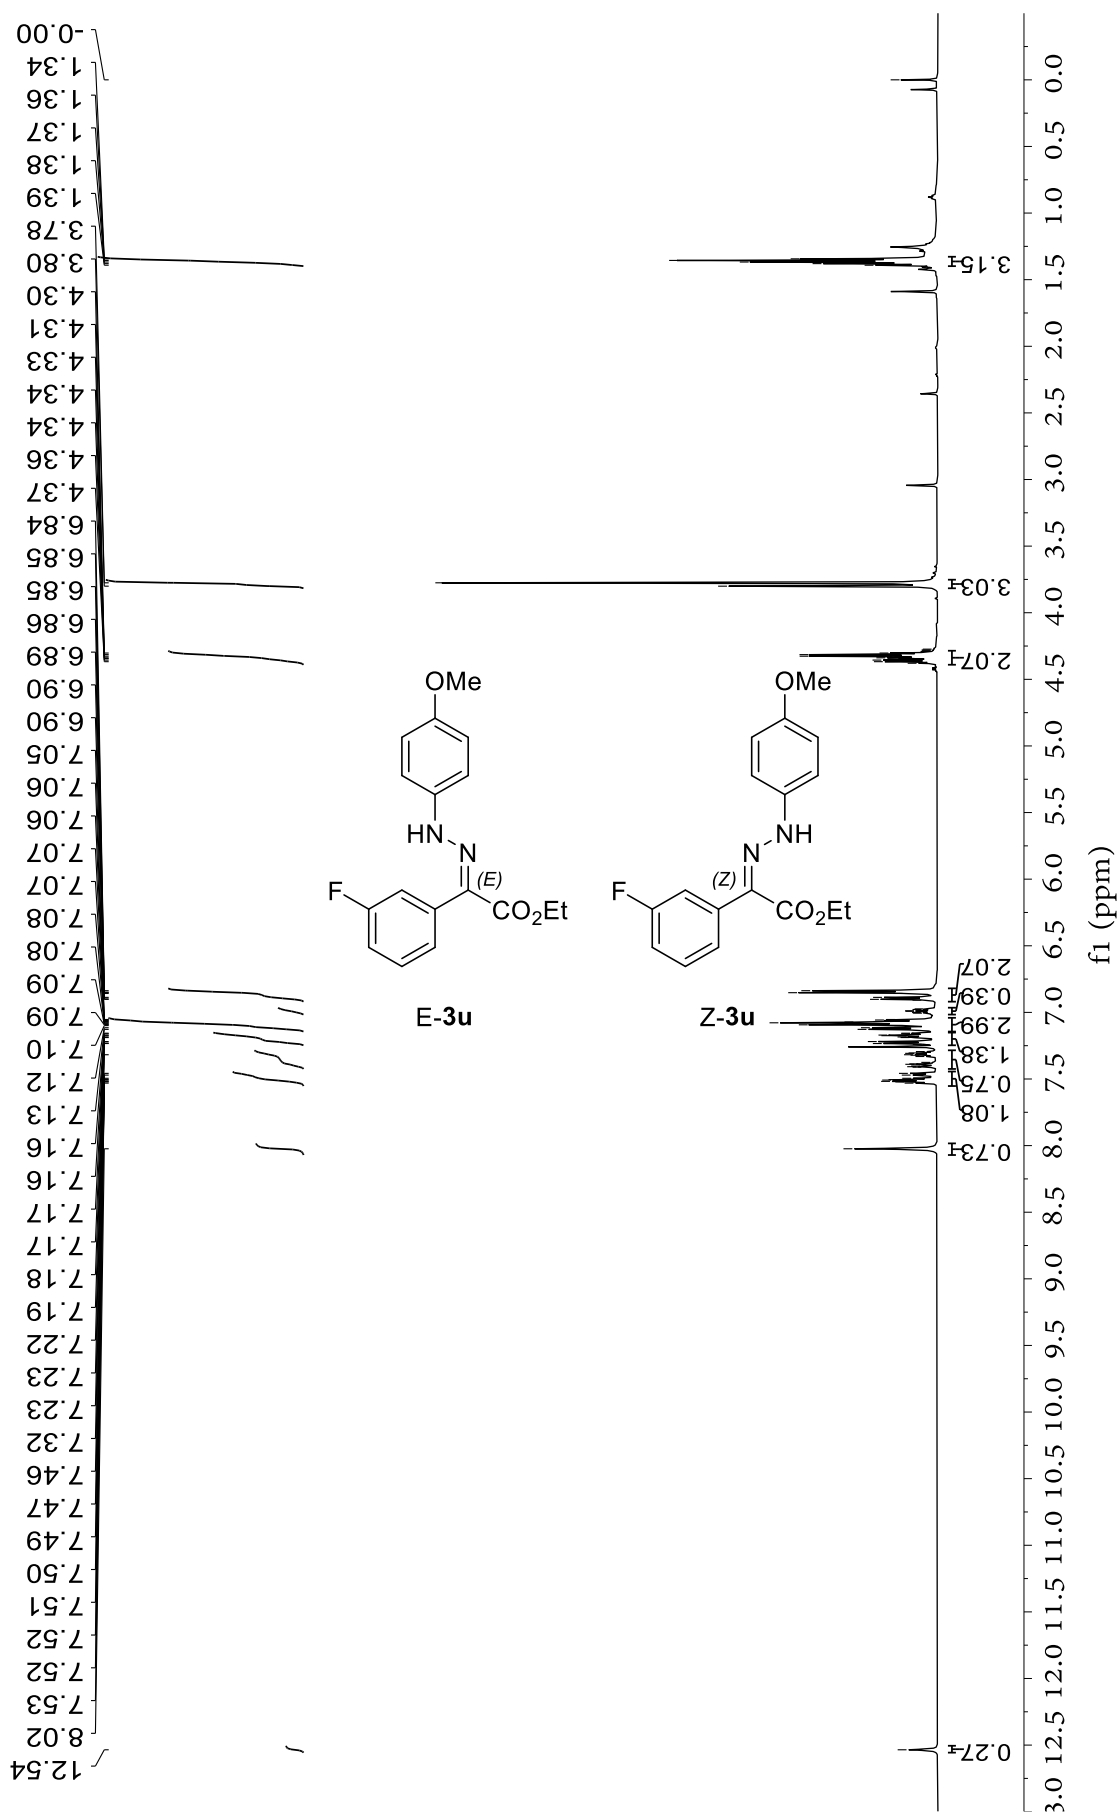

Compound **3u**  $^{13}\text{C}$  NMR (151 MHz,  $\text{CDCl}_3$ )

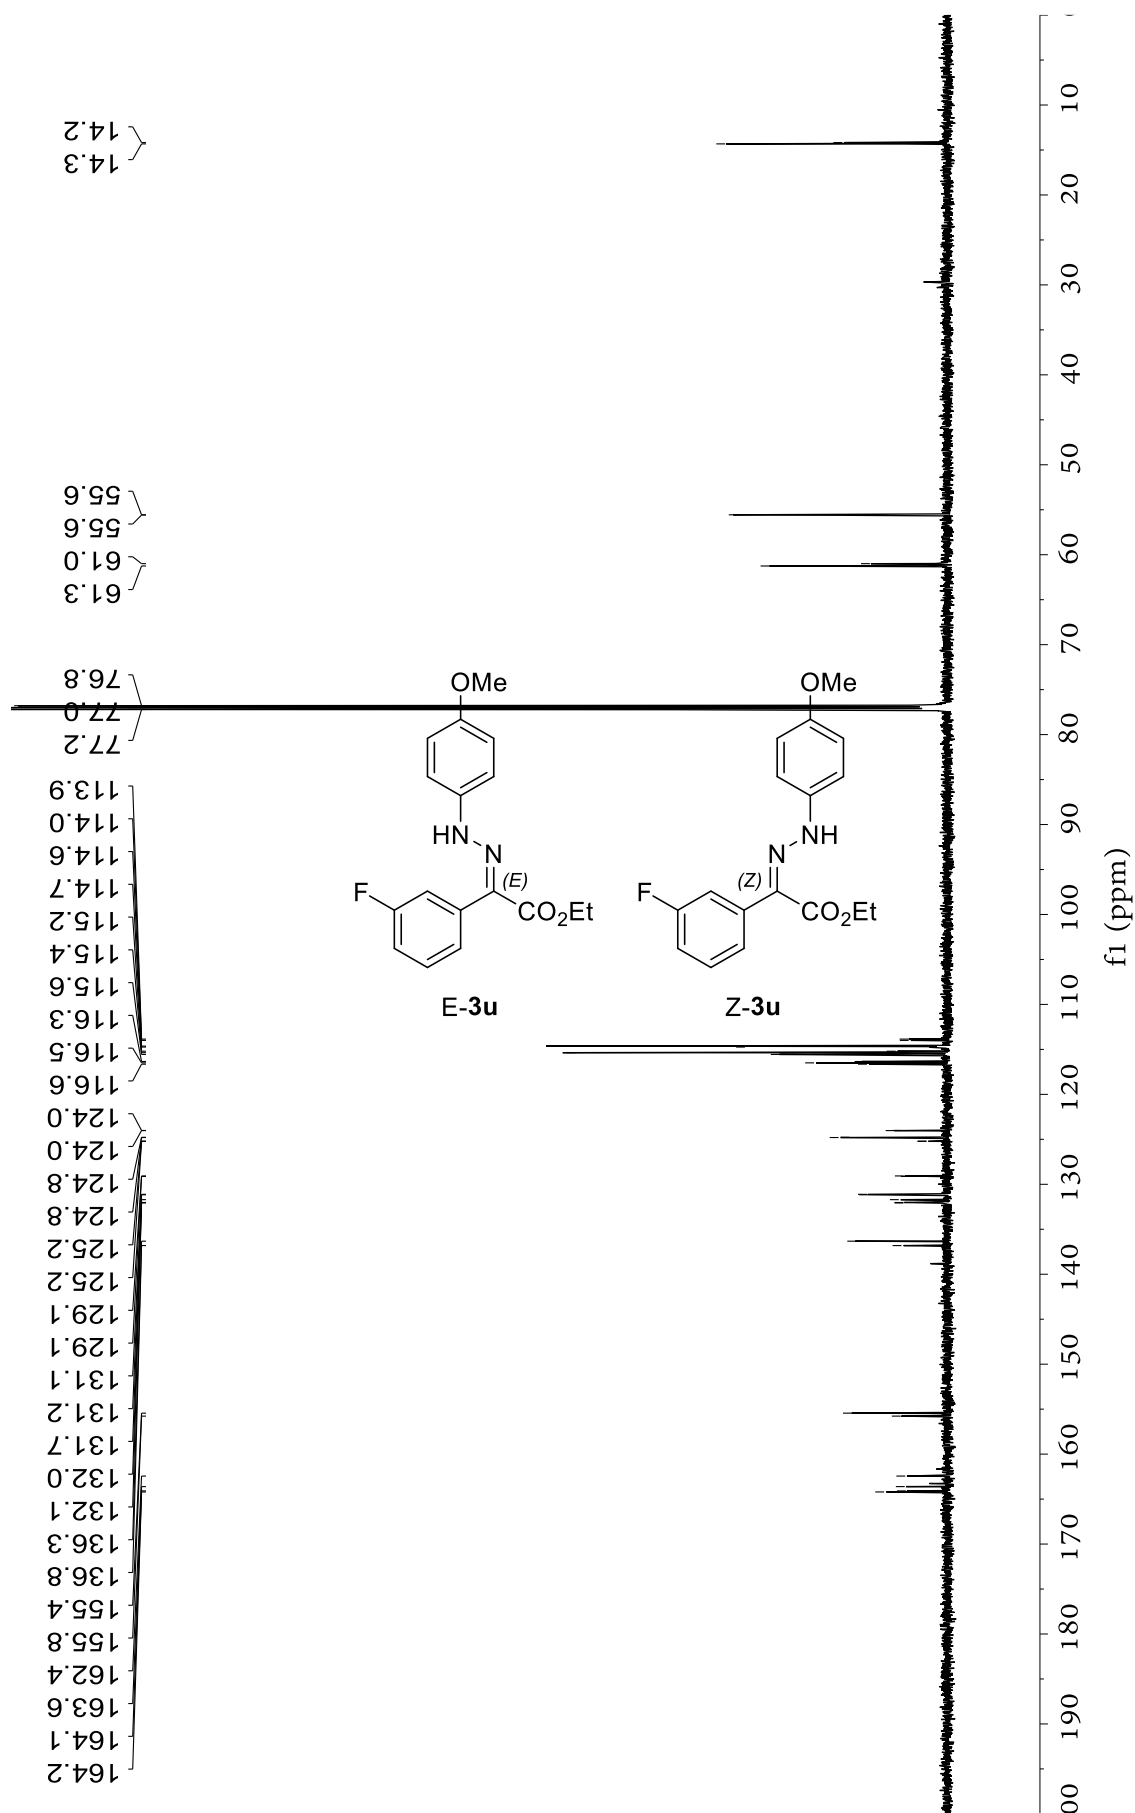



Compound **3u**  $^{19}\text{F}$  NMR (565 MHz,  $\text{CDCl}_3$ )

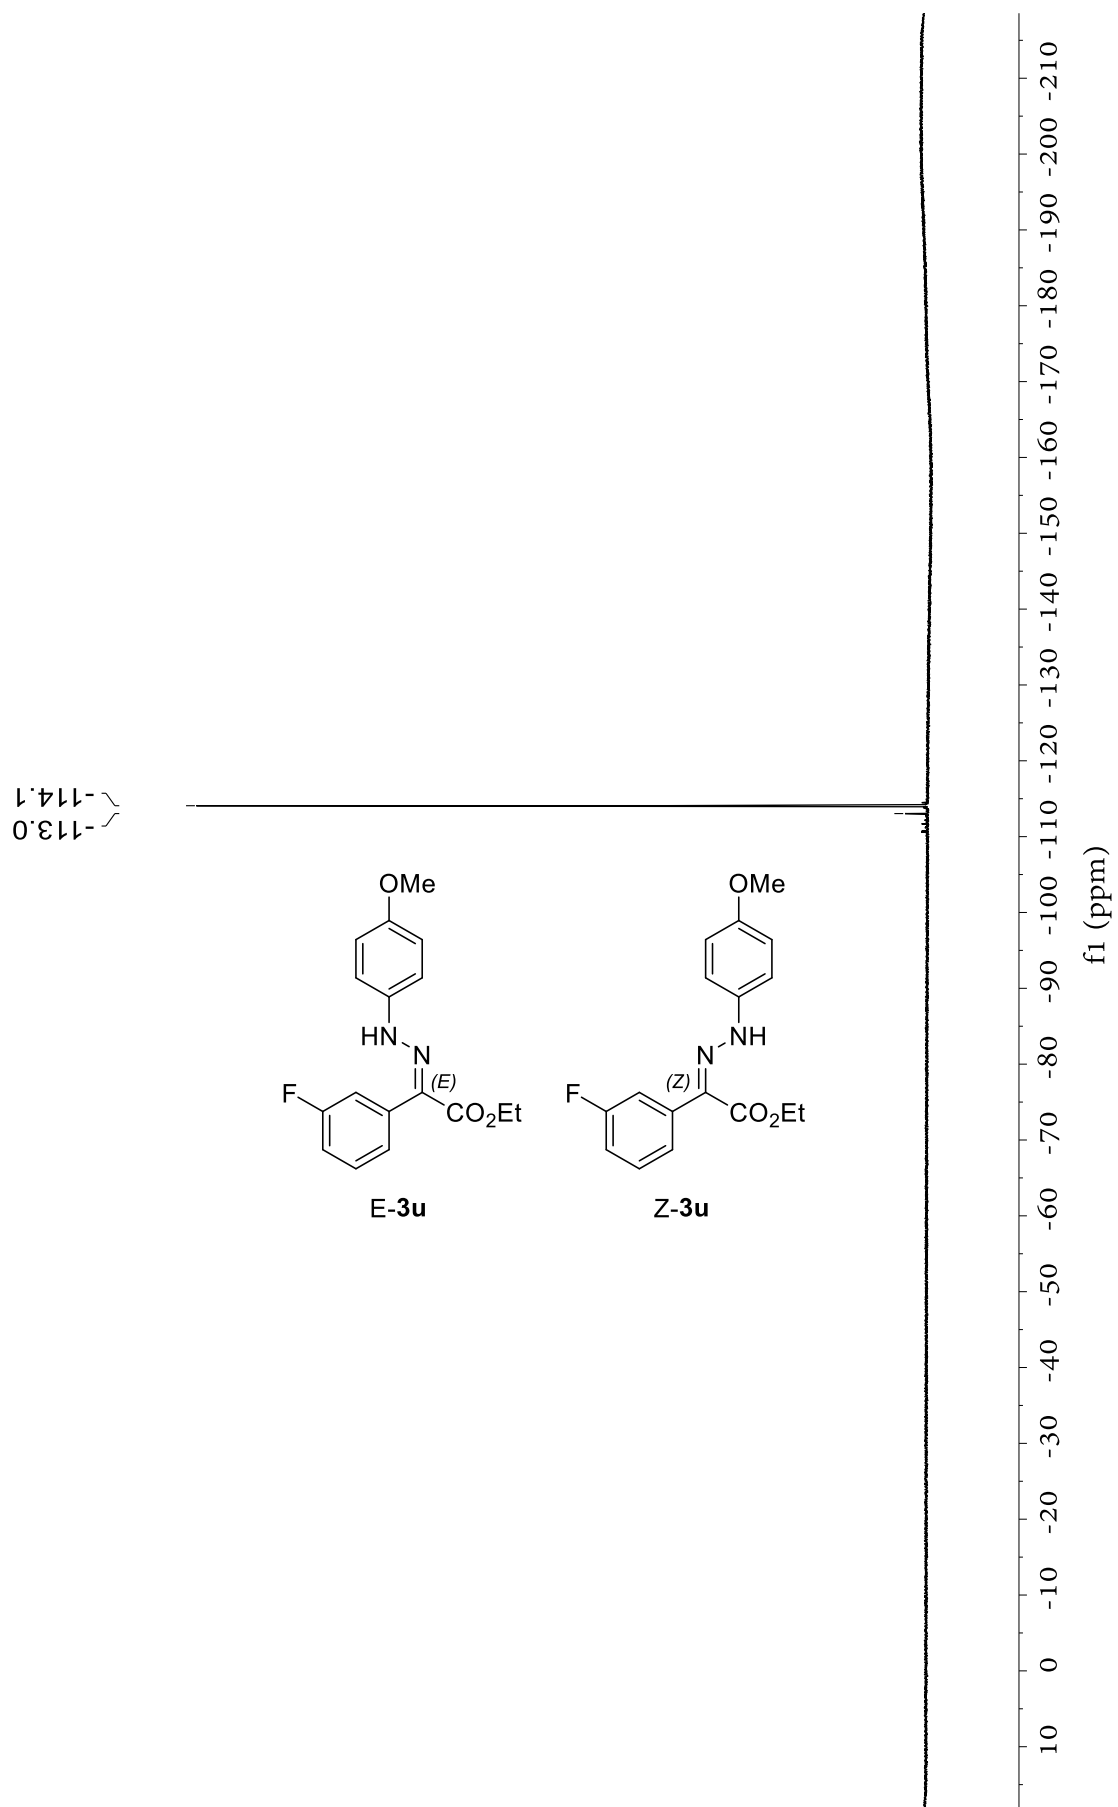



Compound **3v**  $^{13}\text{C}$  NMR (151 MHz,  $\text{CDCl}_3$ )

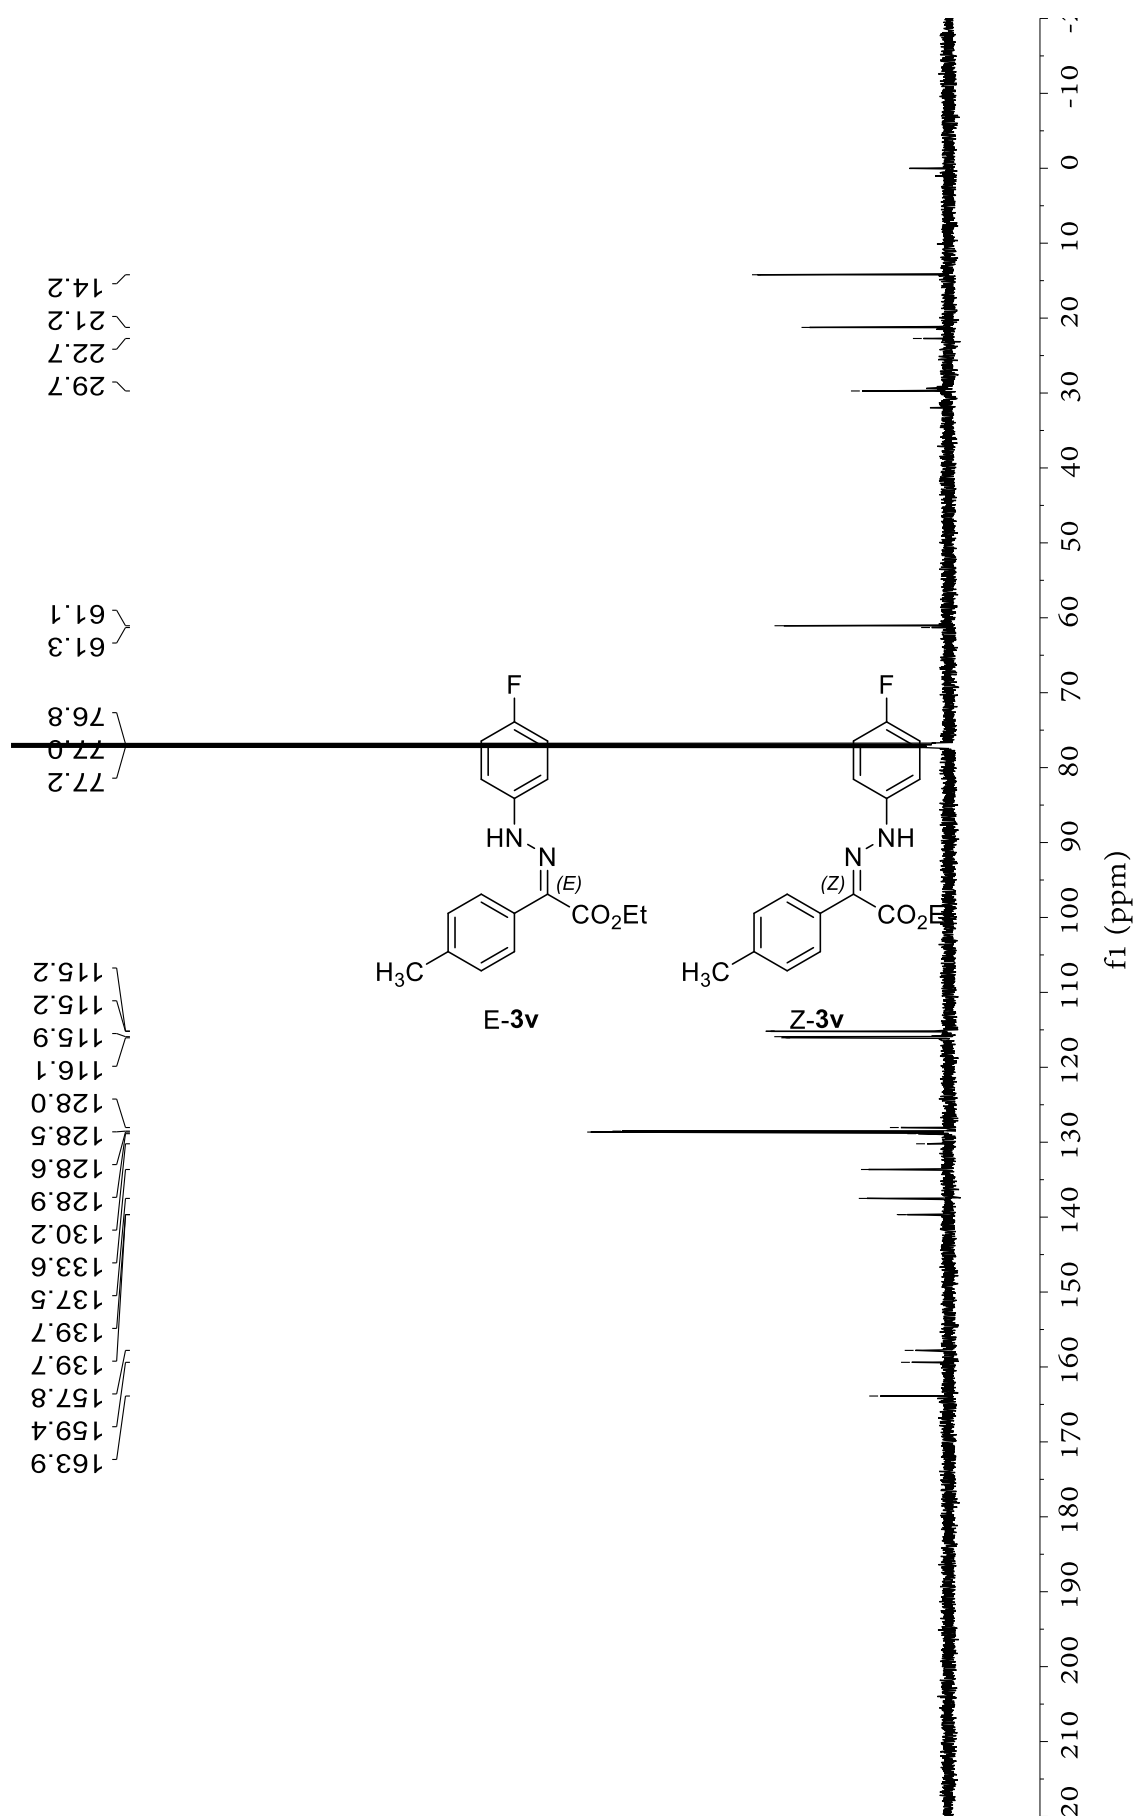

Compound **3v**  $^{19}\text{F}$  NMR (565 MHz,  $\text{CDCl}_3$ )

-121.7  
-121.9

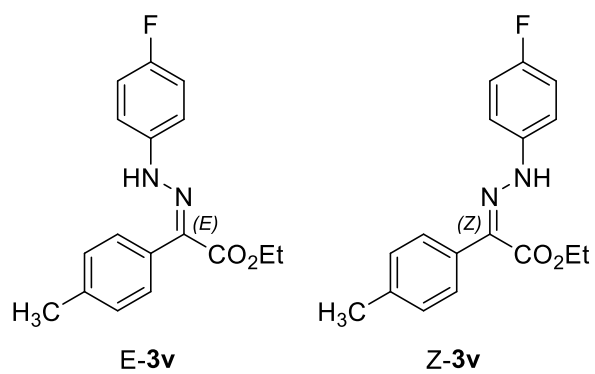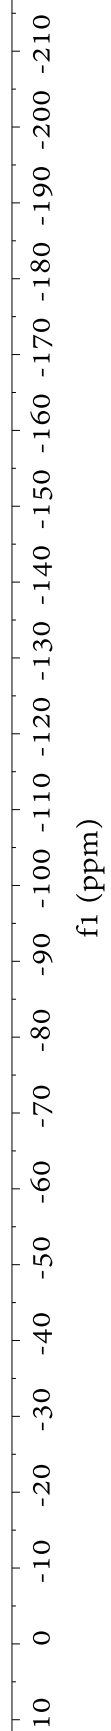

Compound **3v**  $^1\text{H}$  NMR (600 MHz,  $\text{CDCl}_3$ )

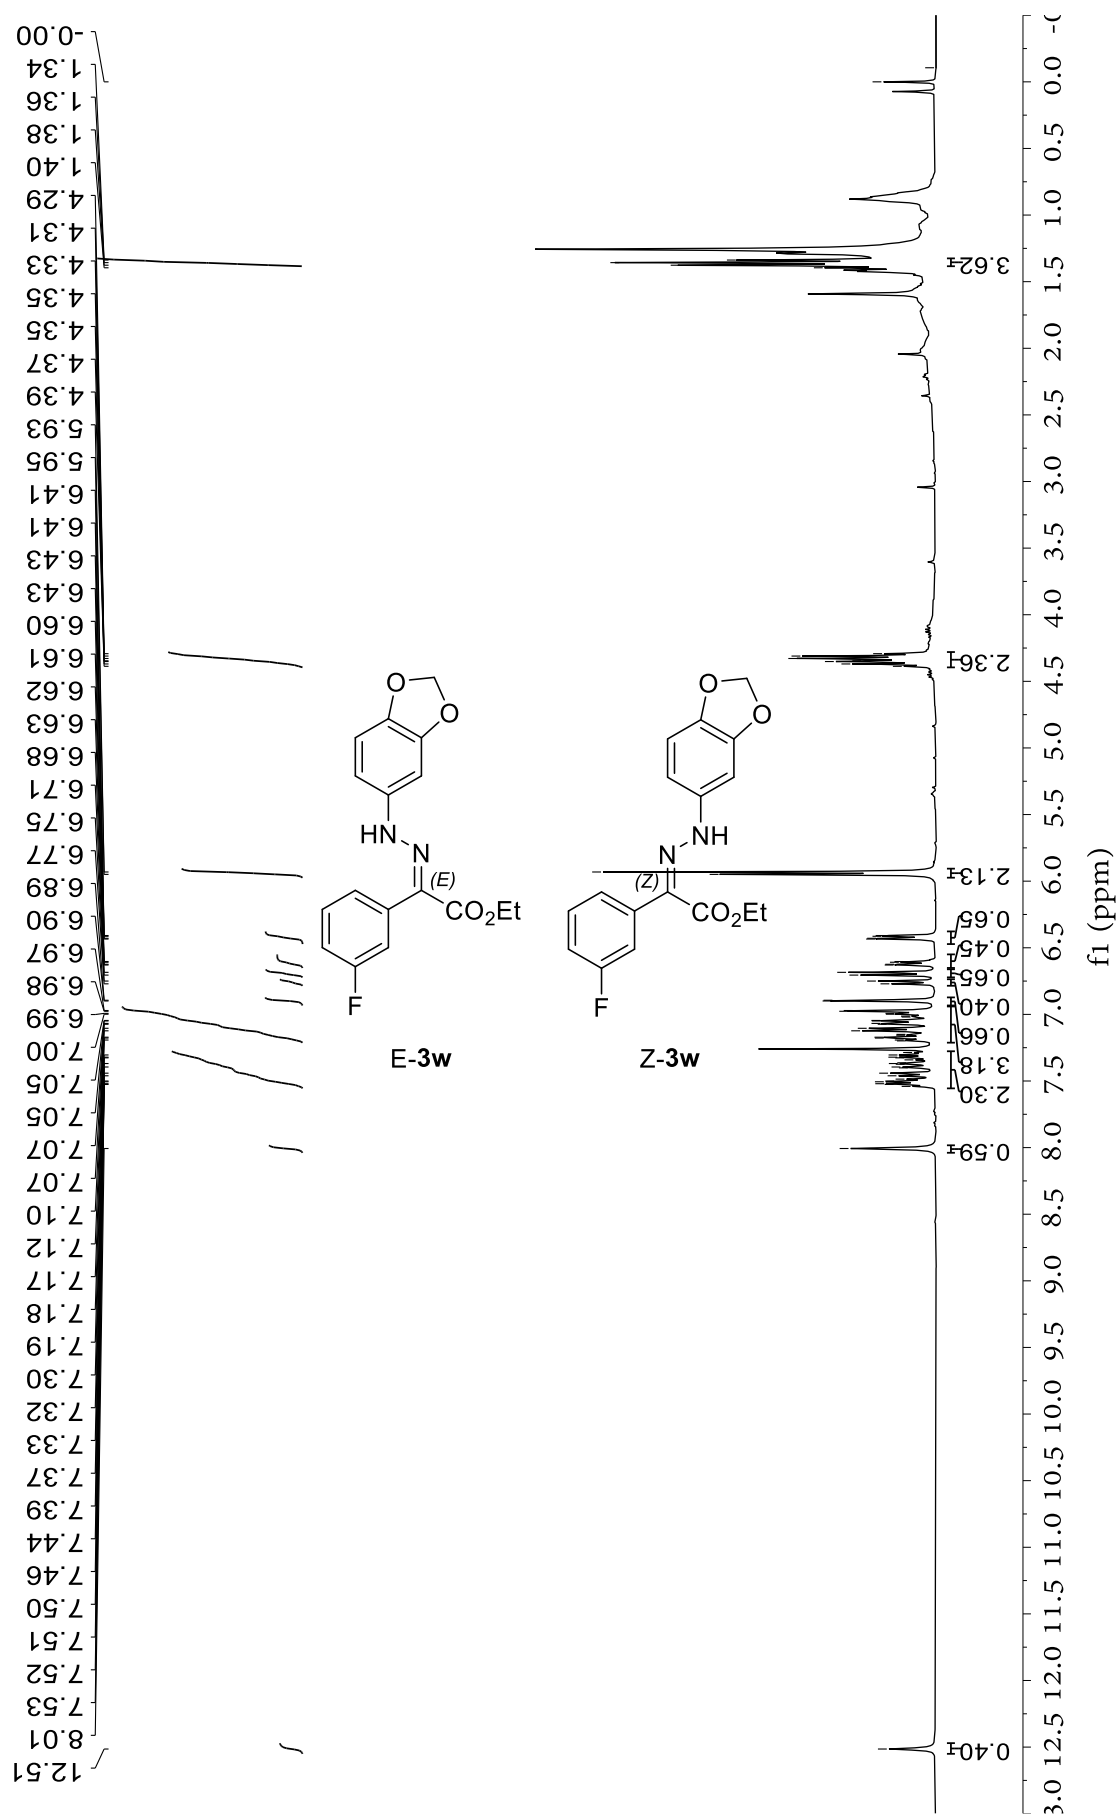

Compound **3w**  $^{13}\text{C}$  NMR (151 MHz,  $\text{CDCl}_3$ )

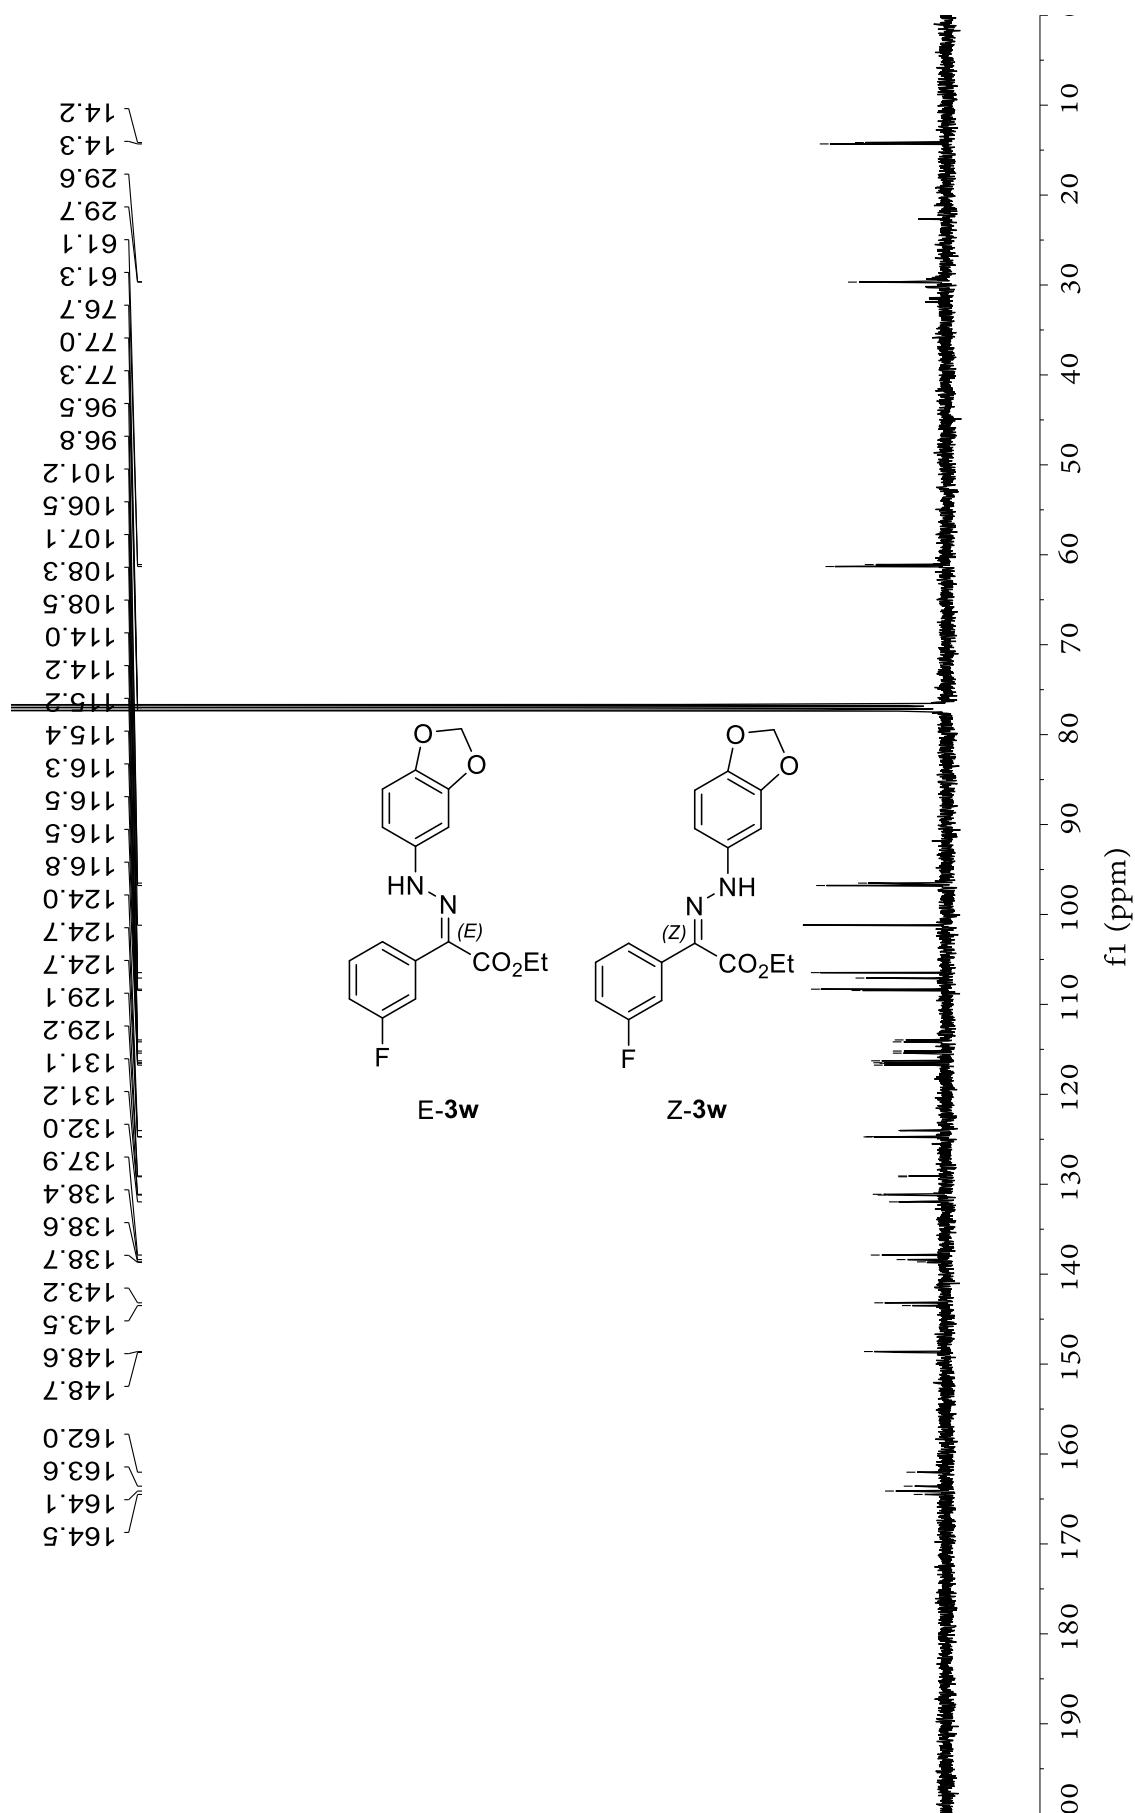

Compound **3w**  $^{19}\text{F}$  NMR (565 MHz,  $\text{CDCl}_3$ )

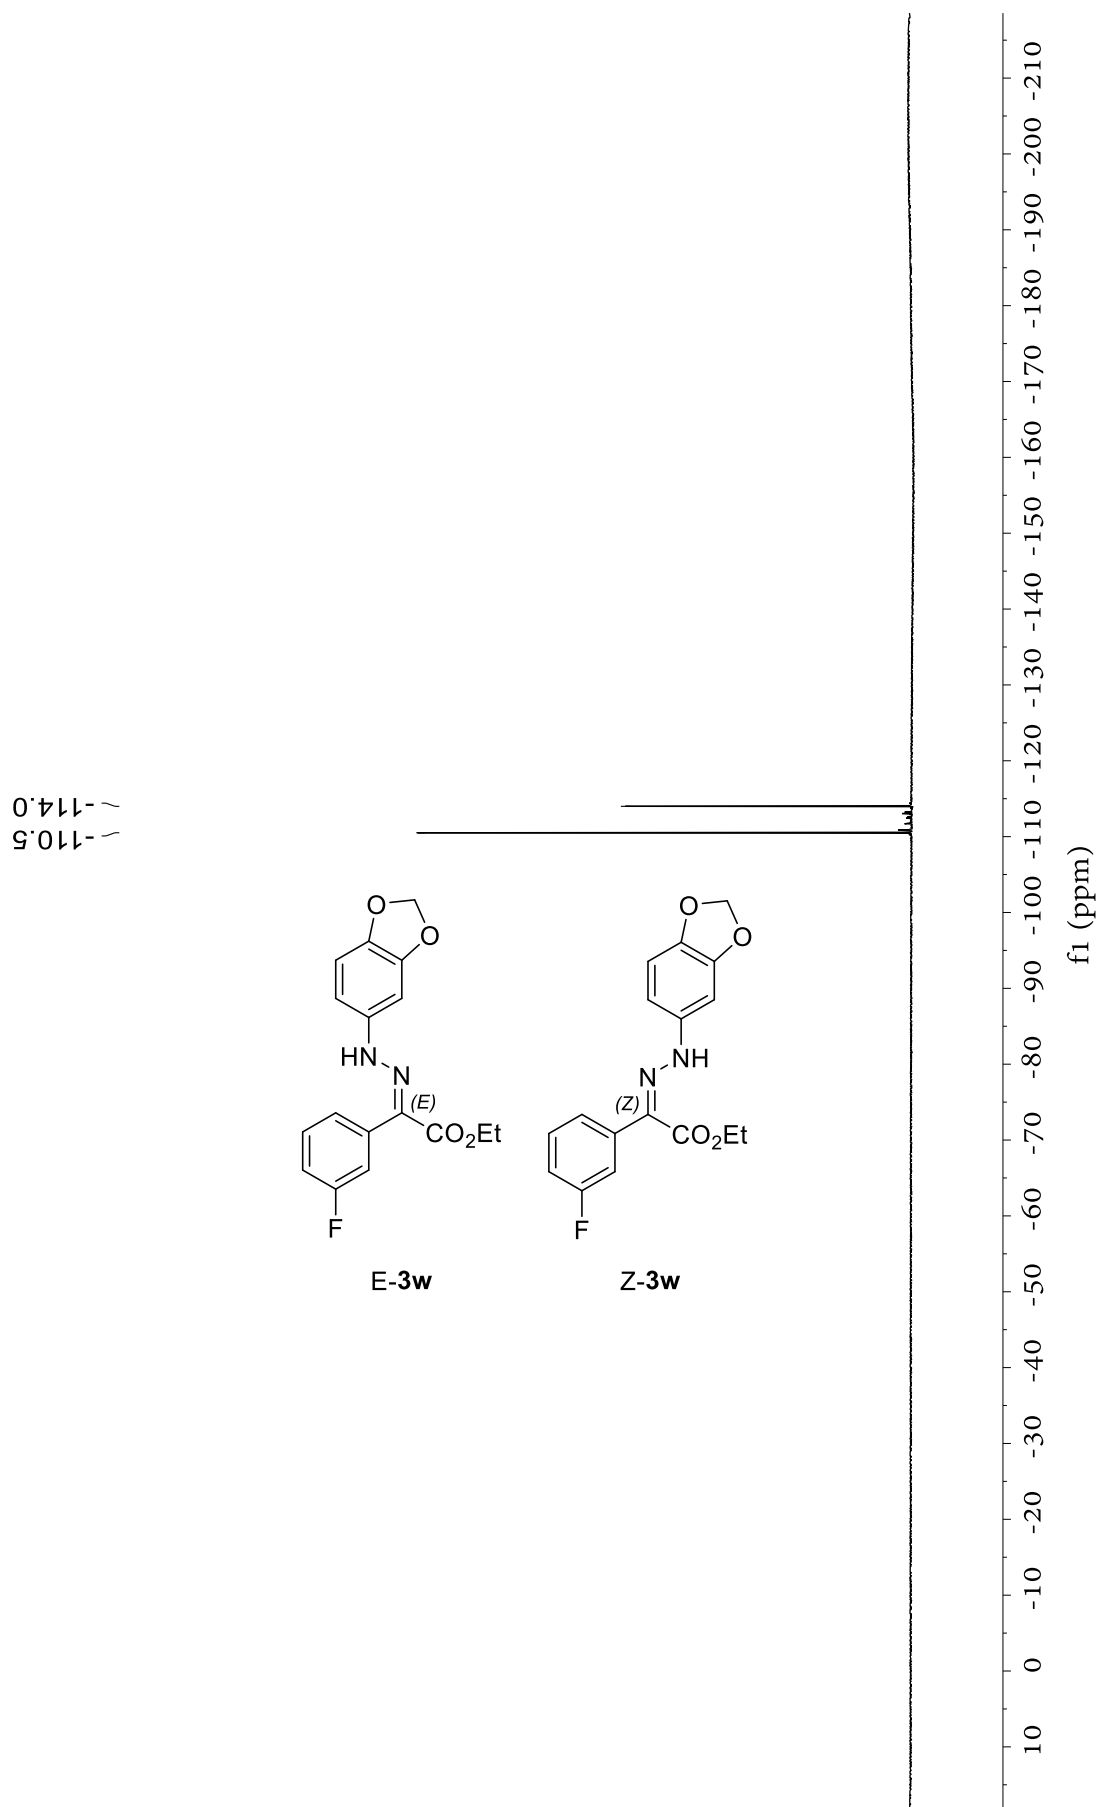

Compound **3x**  $^1\text{H}$  NMR (600 MHz,  $\text{CDCl}_3$ )

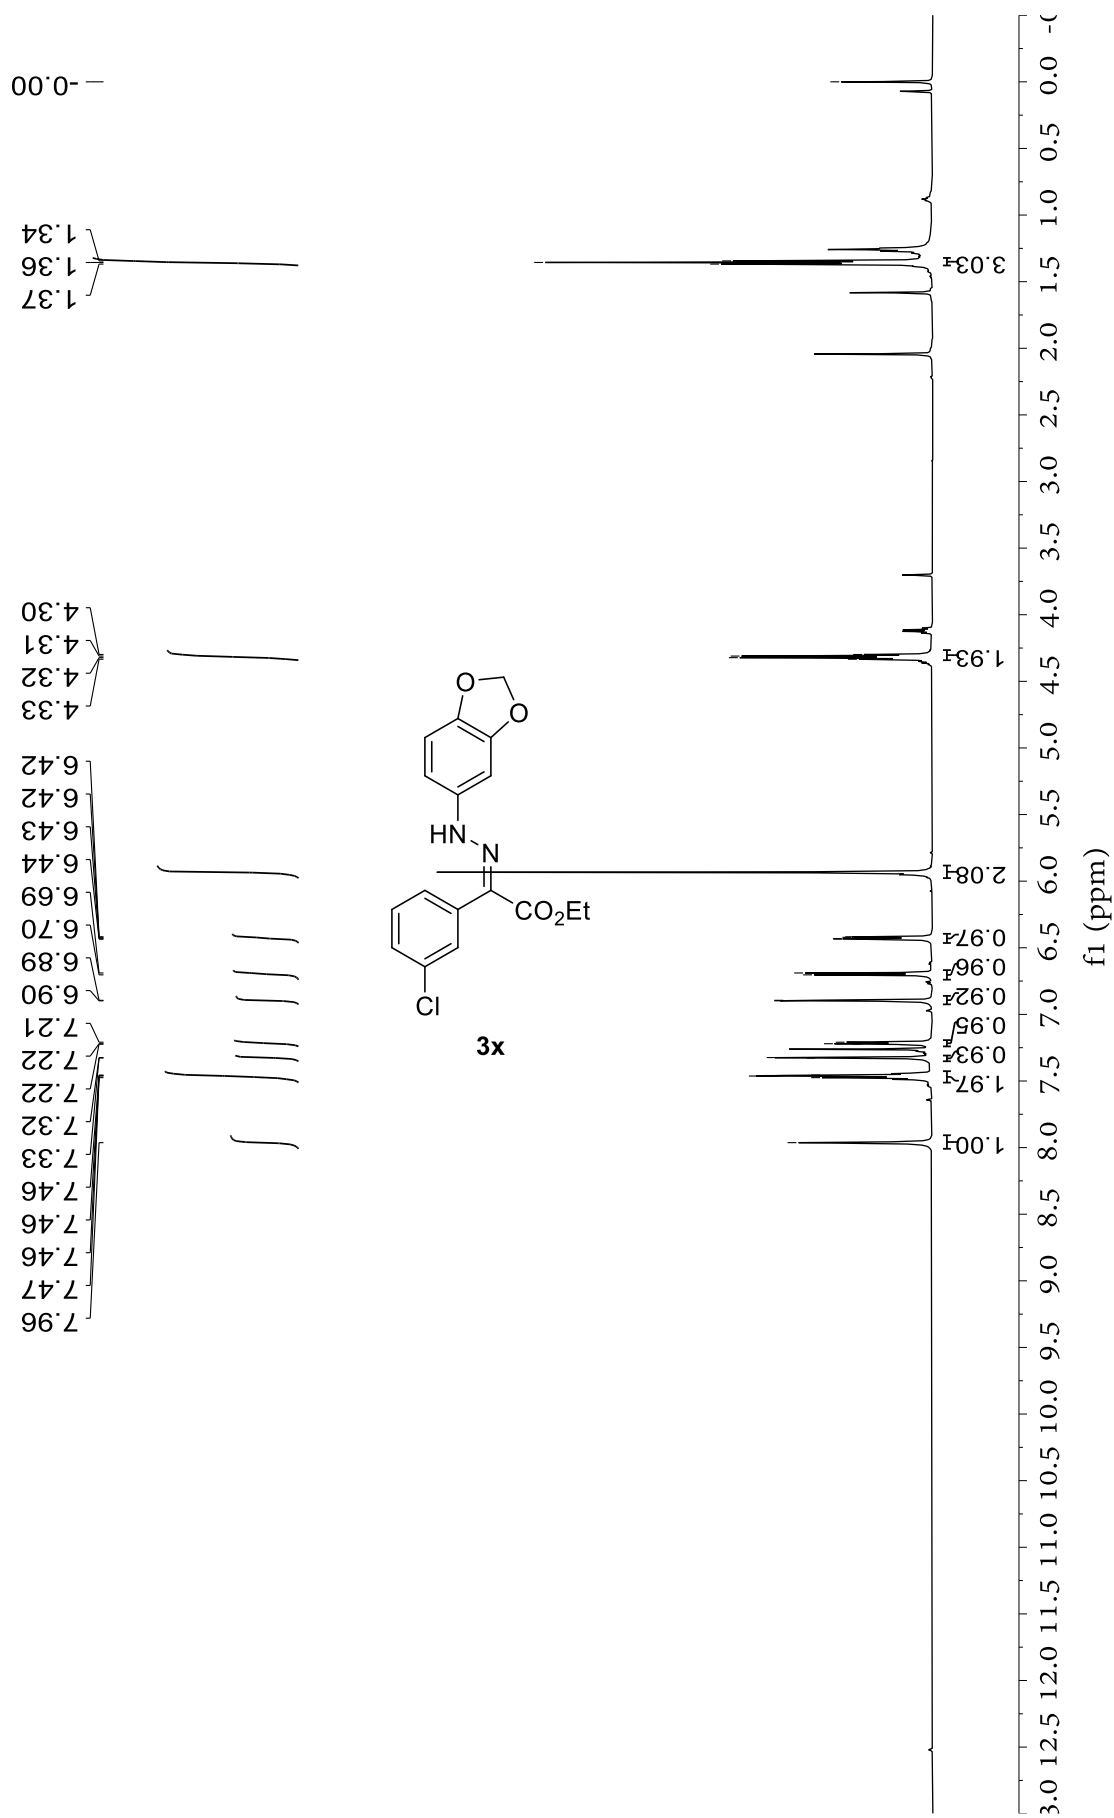



Compound **3w**  $^{13}\text{C}$  NMR (151 MHz,  $\text{CDCl}_3$ )

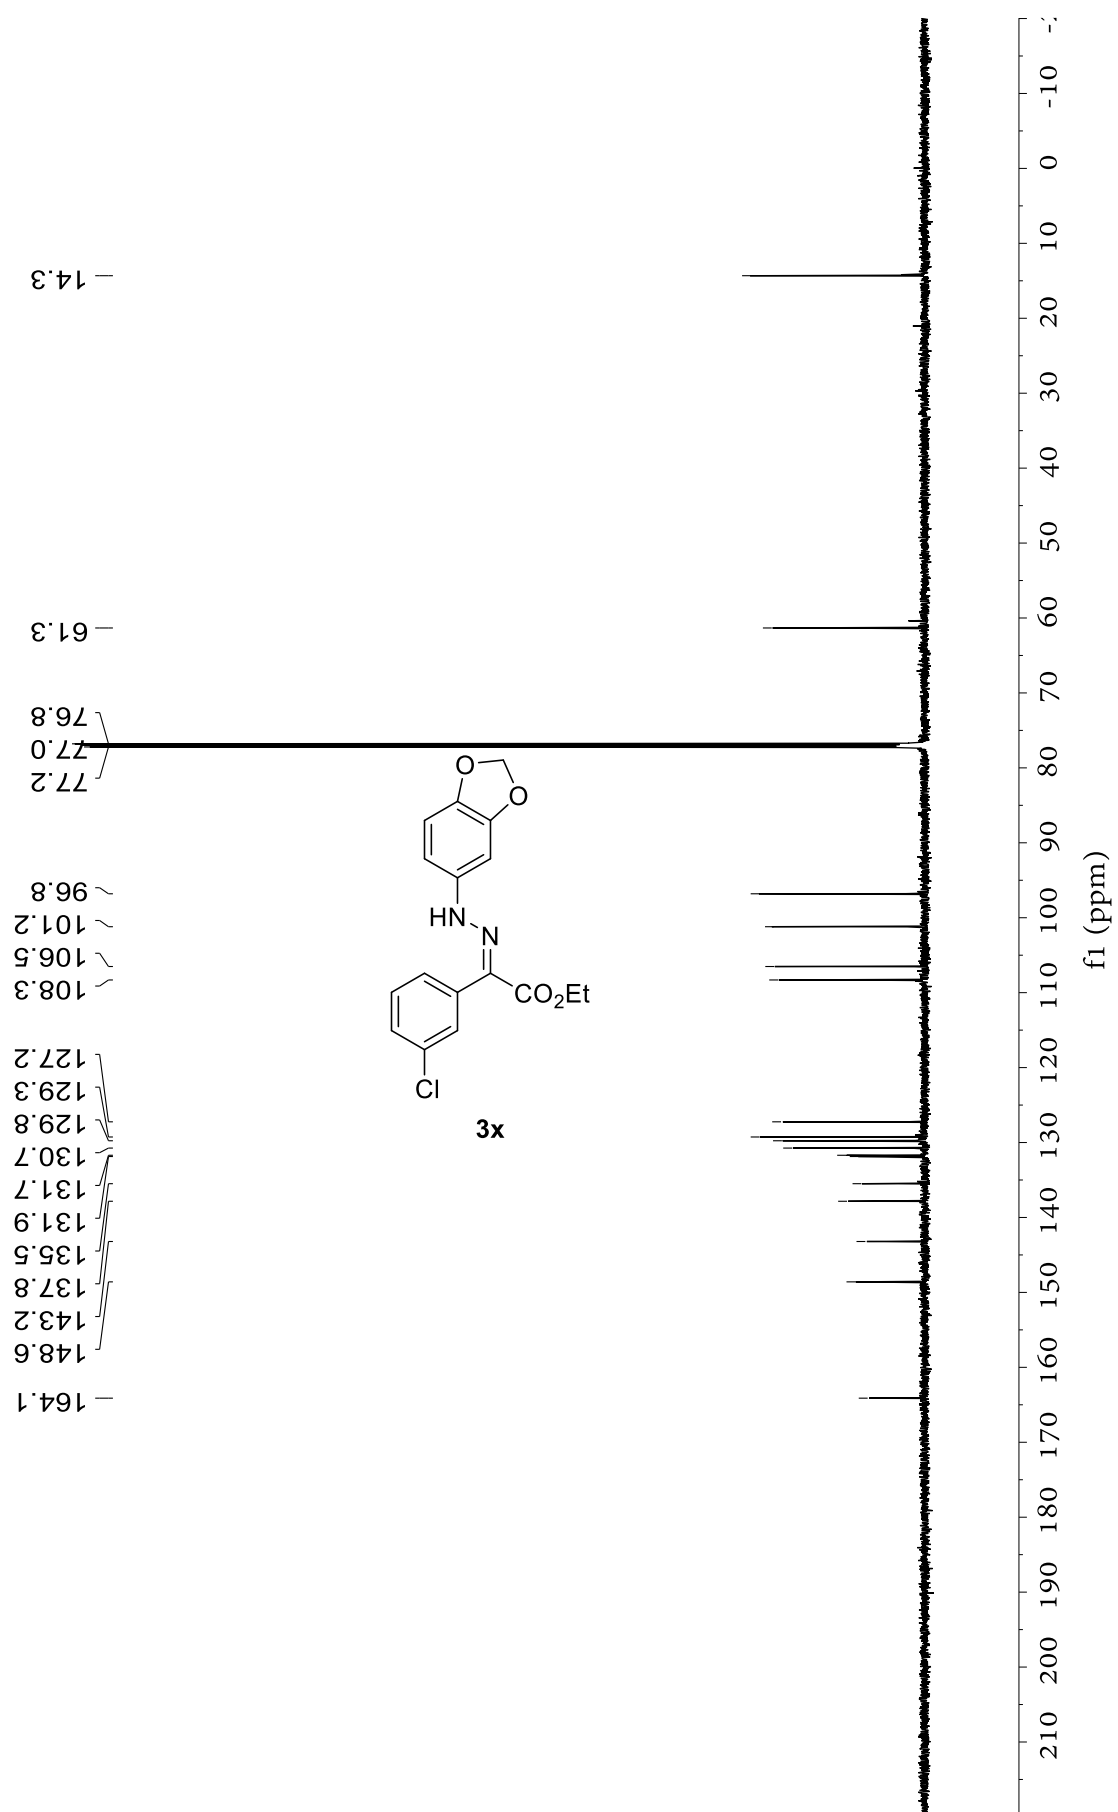

Supplement: d1qo00548k1.pdf [file d1qo00548k1.pdf]
